# Supplementary material for: Host-derived arginine promotes Klebsiella pneumoniae colonization and dissemination through ArtP–ArgR–capsule signaling
Source: Research Square preprint supplement (doi:10.21203/rs.3.rs-8289577/v1), 2025-12-17
Supplement: Supplementary file 1 [file 2a4ac278265b41d94ad97c81.xlsx]

## Sheet: dataset-1
seq_id	SB_MPTA_022023_AC39_19_PBS	SB_MPTA_022023_AC39_20_PBS	SB_MPTA_022023_AC39_21_PBS	SB_MPTA_022023_AC39_22_PBS	SB_MPTA_022023_AC39_23_PBS	SB_MPTA_022023_AC39_24_PBS	SB_MPTA_022023_AC39_13_aCD3	SB_MPTA_022023_AC39_14_aCD3	SB_MPTA_022023_AC39_15_aCD3	SB_MPTA_022023_AC39_16_aCD3	SB_MPTA_022023_AC39_17_aCD3	SB_MPTA_022023_AC39_18_aCD3
1-AMINOCYCLOPROPANECARBOXYLATE	282000	271000	311000	269000	259000	279000	1070000	978000	758000	973000	517000	1110000
2-AMINOISOBUTYRATE	5370	7590	4820	3440	4270	7160	19800	21000	12700	22800	21800	23800
4-HYDROXY-PROLINE	217000	252000	221000	259000	243000	221000	350000	334000	321000	359000	327000	372000
4-IMIDAZOLEACETATE	71100	68000	62800	71100	44900	79200	123000	77700	64700	62200	47000	58000
ALANINE	1050000	1210000	1010000	976000	875000	1030000	3310000	2690000	2160000	3030000	1930000	3180000
AMINOADIPATE	216000	205000	235000	218000	258000	222000	194000	193000	217000	217000	224000	188000
ANSERINE	10800	11900	13400	15500	13000	10800	15900	16800	16100	12800	18600	17700
ARGININE	5620000	7780000	5800000	6470000	5620000	6840000	26900000	22900000	14900000	23200000	11900000	24500000
ASPARAGINE	179000	225000	306000	214000	231000	303000	1420000	1270000	896000	1280000	45700	1500000
ASPARTATE	4840	4820	3010	4030	3170	4440	19500	16000	14800	17500	13000	17000
BETAINE	21000000	33400000	18600000	18500000	17600000	19000000	27500000	24300000	24400000	22100000	32100000	29500000
CARNOSINE	74800	93700	64900	57500	56400	73500	119000	195000	109000	162000	126000	115000
CITRULLINE	390000	245000	210000	192000	185000	199000	722000	875000	883000	851000	656000	1040000
CREATINE	25400000	31300000	21300000	23900000	22600000	21100000	33300000	32000000	29500000	35200000	38300000	34700000
CREATININE	10600000	11700000	9410000	13900000	8060000	13600000	20700000	20800000	8340000	15900000	10700000	10700000
CYSTATHIONINE	6040	6050	5980	5460	5890	4800	7810	5970	7930	6270	7260	7520
CYSTINE	112000	205000	137000	69200	122000	114000	59800	67200	77000	53400	162000	181000
DEOXYCARNITINE/4-GUANIDINOBUTANOATE	2530000	2900000	2490000	3000000	2090000	2720000	3200000	2180000	2310000	2200000	2520000	2330000
DIMETHYLARGININE (SDMA/ADMA)	4630000	4540000	4760000	5300000	3690000	4230000	10000000	10500000	9380000	9910000	5250000	10900000
DIMETHYLGLYCINE	41700	54800	37200	47900	44800	35500	48300	56400	43500	41900	66900	59200
DOPA	4550	4950	6040	3920	4010	5140	6510	5920	3380	6690	3650	5500
GAMMA-AMINOBUTYRATE	59700	66100	54800	64900	49700	61900	57600	62600	55400	63300	67000	58800
GLUCOSAMINATE	2210	3050	3370	2910	4680	4430	4050	5410	4420	4190	3300	5180
GLUTAMATE	1440000	1540000	1330000	1410000	1520000	1640000	4130000	3200000	3410000	3520000	2540000	4080000
GLUTAMINE	2300000	2570000	2300000	1990000	1810000	2380000	9640000	8220000	6610000	9030000	4590000	8880000
GLUTARYLCARNITINE	344000	331000	279000	285000	298000	293000	348000	363000	254000	354000	359000	299000
GLYCINE	5640	6340	6160	4830	4510	5890	45300	35200	27800	35900	12800	40500
GUANIDINOACETATE	17600	33300	37700	22800	25700	24600	70300	81300	40700	51300	32900	66400
HISTIDINE	8720000	9080000	7420000	6050000	6420000	7520000	48800000	42100000	34600000	42000000	20200000	50100000
ISOLEUCINE	533000	709000	614000	441000	508000	707000	4650000	3590000	2810000	4000000	1300000	4110000
ISOVALERYLCARNITINE	1800000	1550000	1140000	964000	1230000	954000	893000	916000	816000	853000	2610000	1080000
KYNURENATE	88200	103000	55100	67800	59400	73200	97800	97000	76200	103000	70900	70300
KYNURENINE	2220	3080	3040	2720	1490	3190	10800	9970	8030	10000	4310	9730
LEUCINE	734000	952000	803000	685000	735000	904000	4420000	3740000	2800000	4180000	1770000	4150000
LYSINE	1530000	1610000	1090000	1050000	1090000	1450000	6410000	5230000	4010000	5490000	2860000	6240000
METHIONINE	401000	549000	403000	328000	319000	528000	3090000	2390000	1750000	2760000	1020000	2770000
N,N,N-TRIMETHYLLYSINE	1700000	1780000	1820000	1760000	1540000	1600000	4660000	4830000	4090000	4110000	2300000	5660000
N-ACETYLALANINE	32500	44800	34200	44900	41300	46000	74700	74600	69600	63400	38200	76600
N-ACETYLASPARAGINE	5460	6950	7340	8350	7410	10300	7540	10500	8250	9160	5130	6900
N-ACETYLLEUCINE	11400	15500	12000	14800	11500	13600	18000	18400	19500	17600	10700	17900
N-ACETYLPHENYLALANINE	5130	6420	3710	5920	5000	5150	3480	3730	4510	3550	3780	2780
N-ACETYLPROLINE	17200	18200	19000	23000	16700	20400	17800	16400	18000	18100	15800	14500
N-ACETYLPUTRESCINE	212000	145000	137000	211000	138000	165000	121000	142000	121000	124000	275000	97000
N-ALPHA-ACETYLLYSINE	1640000	1560000	1780000	1570000	1550000	1800000	2200000	2070000	1900000	2060000	1850000	1930000
OPHTHALMATE	5380	9210	5170	6900	3430	6840	791	2110	2020	3270	21200	4550
PHENETHYLAMINE	3430	3390	2830	2280	2990	2240	4800	4080	6020	3570	2390	3270
PHENYLALANINE	3700000	4810000	4170000	3090000	3450000	4940000	32800000	25300000	20000000	30900000	11100000	31800000
PICOLINATE	154000	170000	135000	147000	173000	156000	157000	164000	136000	145000	143000	137000
PIPECOLATE	29300	34800	26900	30700	25900	28800	51200	45000	37000	51900	69500	63700
PROLINE	32600000	36600000	38400000	35800000	31900000	33000000	53100000	48100000	44400000	50200000	39600000	50000000
PROPIOYLCARNITINE	882000	1060000	717000	630000	775000	711000	461000	480000	481000	535000	1720000	539000
S-ADENOSYLHOMOCYSTEINE	2870	4770	3920	4220	4310	3890	4070	4360	4300	3970	3580	6060
SERINE	234000	298000	274000	211000	227000	282000	1590000	1410000	1040000	1510000	648000	1740000
TAURINE	138000	151000	126000	133000	107000	119000	74200	67000	84800	110000	182000	104000
THREONINE	10500	10300	10300	8680	9210	9760	54300	45200	32000	50000	21200	48600
TRYPTAMINE	9280	8990	8440	8410	9050	8470	6310	5530	10200	5970	5250	15600
TRYPTOPHAN	983000	1110000	925000	751000	743000	1130000	10800000	8330000	6330000	9240000	2370000	9350000
TYRAMINE	53400	29000	46700	45000	44000	38000	31500	26900	33200	24600	28700	20600
TYROSINE	248000	252000	238000	176000	170000	249000	2000000	1660000	1170000	2010000	690000	1870000
VALINE	1080000	1230000	1130000	876000	818000	1280000	8430000	6340000	4890000	7720000	2560000	7770000

## Sheet: dataset-2
Amino Acid	Fiber-free (FF) exclusive enteral nutrition (EEN) diet										Vegan										standardized omnivore diet
Alanine	670.98	9102.06	5095.45	1680.7	2052.64	7779.1	2480.8	2355.03	5793.71	5515.87	65.045	455.27	300.69	381.305	267.805	347.225	84.705	998.84	1819.65	384.68	822.29	163.73	310.29	318.275	8334.6	414.505	428.865	351.015	136.925	408.135
Arginine	1892.26	241.075	2741.36	336.945	934.805	1501.6	473.535	1187.48	3721.89	2952.16	32.435	125.935	85.36	148.845	84.775	121.535	15	15	25.735	99.045	14.86	15	85	15	337.84	158.33	100.145	236.73	45.83	77.01
Asparagine	15	1745.2	2509.1	15	15	166.89	15	15	2617	2286	15	77.32	97.545	15	85.29	15	15	15	15	15	15	15	15	15	97.08	15	15	204.81	15	15
Aspartic Acid	1986	75.74	3472	105.2	63.67	157.9	85.69	22.04	12488	6804	60.46	511.9	54.68	301.1	35.39	134.6	15	101.6	15	52.37	15	103.5	61.96	39.24	136.4	45.55	199.7	108.9	92.06	38.35
Cysteine	325.725	15	835.415	41.635	12.04	15	15	53.035	947.195	651.555	6.93	15	15	15	15	15	15	15	15	15	15	15	15	15	15	15	15	15	15	15
Glutamic Acid	3894.09	9381.73	9959.67	4262.24	2883.45	3881.32	4078.59	3093.6	12161.8	7244.88	610.855	1491.6	1337.42	2585.6	5686.35	1362.38	67.605	202.795	42.5	2496.93	102.195	118.185	156.39	144.815	45.63	942.765	184.015	144.16	956.385	128.27
Glutamine	15	214.31	87.82	15	15	170.75	15	15	10491	8654.53	15	88.1	68.23	105.51	61.55	88.04	15	15	15	59.805	15	91.345	76.025	119.835	96.125	67.71	117.54	71.66	15	66.385
Glycine	1512.06	6820.76	7267.88	1587.03	2037.03	8565.32	1877.44	3114.87	9124.77	8161.91	924.42	244.1	120.9	3051.93	44.85	221.21	162.525	2664.28	386.855	4919.73	57.395	395.67	1896.15	97.495	2979.29	108.09	89.9	152.02	685.985	107.08
Histidine	818.355	15	61.295	600.92	449.26	15	918.525	910.765	15	15	15	15	15	227.51	15	15	15	15	15	15	15	115.81	15	73.04	104.09	15	15	15	43.86	45.515
Isoleucine	503.71	1511.1	2286.1	1029.6	1563.3	5363.2	2214.6	1683.7	4021.8	4678.9	14.635	40.59	15	52.06	15	60.285	15	116.45	604.94	15	38.885	15	58.245	57.735	3644.3	82.735	158.22	88.735	30.21	90.06
Leucine	800.33	2653.43	3442.98	1413.42	2209.26	8900.4	15	15	5745.36	6521.99	24.385	53.655	15	91.67	50.5	80.595	15	225.86	517.335	15	66.745	76.265	93.29	184.155	5768.66	143.985	322.07	197.085	50.99	299.955
Lysine	1404	16072	3587	15	15	9572	15	15	6682	4655	55.13	759.5	220.5	416.2	596.7	349.1	63	670.1	15	1129	38.34	121.3	239.1	346.5	209.4	619	367.3	827.9	217.2	270
Methionine	116.95	503.625	576.18	282.86	428.24	2196.45	594.435	465.97	924.435	1062.94	10.28	98.105	66.145	129.69	15	84.49	15	149.265	15	61.905	31.925	64.905	15	127.095	870.895	69.75	181.88	242.235	30.585	210.045
Phenylalanine	1000.02	4022.74	5461.26	992.51	1476.39	9301.08	1806.11	1470.21	5666.06	5551.73	20.65	126.195	839.775	15	15	15	15	162.7	303.2	15	33.235	15	72.835	86.78	4384.45	87.01	182.085	106.495	28.41	160.09
Proline	449.505	15600.5	3625.3	1938.72	1600.16	6929.57	1916.6	2154.74	3660.06	3689.66	80.18	166.725	202.43	3481.14	144.22	345.415	16.79	114.7	26.575	255.92	26.87	147.25	198.705	144.555	2602.06	387.26	167.19	321.44	64.065	107.99
Serine	1884	587.6	40.88	20.2	29.78	451.9	18.91	33.89	15	15	14.22	541.7	651.5	681.6	567.3	15	7.07	15	16.15	1258	13.01	15	1340	15	262.9	15	1250	15	14.52	15
Threonine	2382.9	242.14	7006.7	37.48	38.47	126.97	51.55	41.89	7732.9	6280.8	38.035	198.13	100.56	216.4	117.68	82.495	17.77	100.5	15	191.52	30.135	88.185	108.52	152.02	62.89	140.49	190.24	127.68	49.645	134.97
Tryptophan	15	6347.3	7267.1	15	15	15834.1	15	15	7605.88	7439.23	15	402.82	15	722.905	15	15	15	561.305	15	644.97	15	15	544.065	15	15	15	15	15	15	155.985
Tyrosine	1213.89	4335.37	5431.82	830.415	1605.06	9202.36	1394.1	1601.61	5704.8	5579.94	13.585	41.95	53.53	71.91	48.09	82.62	15	148.34	169.85	44.695	42.67	66.845	83.49	144.6	3780.59	97.455	175.855	104.42	22.545	150.125
Valine	1357.73	7829.73	5689.8	15	15	10929.5	15	15	7634.99	7748.02	364.835	183.38	212.695	182.67	8276.62	137.38	214.055	640.67	166.1	118.915	214.225	272.71	118	181.755	274.595	98.975	272.39	334.95	1402.28	204.835
*Samples below limit of detection set to 15pmol/mg

## Sheet: dataset-3
IPM vs no antibiotics
Peak	D1_IPM_1	D1_IPM_2	D1_IPM_3	D2_IPM_1	D2_IPM_2	D2_IPM_3	D3_IPM_1	D3_IPM_2	D3_IPM_3	D4_IPM_1	D4_IPM_2	D4_IPM_3	D5_IPM_1	D5_IPM_2	D5_IPM_3	D6_IPM_1	D6_IPM_2	D6_IPM_3	D7_IPM_1	D7_IPM_2	D7_IPM_3	D8_IPM_1	D8_IPM_2	D8_IPM_3	D9_IPM_1	D9_IPM_2	D9_IPM_3	D10_IPM_1	D10_IPM_2	D10_IPM_3	D11_IPM_1	D11_IPM_2	D11_IPM_3	D1_No_abx_1	D1_No_abx_2	D1_No_abx_3	D2_No_abx_1	D2_No_abx_2	D2_No_abx_3	D3_No_abx_1	D3_No_abx_2	D3_No_abx_3	D4_No_abx_1	D4_No_abx_2	D4_No_abx_3	D5_No_abx_1	D5_No_abx_2	D5_No_abx_3	D6_No_abx_1
Arabinose	1400000	1400000	1440000	1420000	1340000	1550000	1570000	1590000	1390000	878000	866000	960000	1440000	1470000	1550000	1800000	1700000	1700000	1480000	1350000	1290000	1600000	1600000	1570000	1230000	1240000	1230000	2000000	1930000	1930000	1630000	1680000	1710000	2250000	2230000	2250000	2380000	2280000	2250000	1890000	1790000	1920000	1150000	2390000	1900000	2690000	1180000	1820000	1570000
Fructose	1180000	1190000	1210000	1280000	1230000	1350000	1280000	1280000	1100000	990000	1030000	1010000	1360000	1400000	1420000	2230000	2800000	3060000	1640000	1620000	1460000	1470000	1540000	1480000	1280000	1260000	1280000	1460000	1430000	1400000	1620000	1670000	1690000	1590000	1590000	1620000	1670000	1620000	1610000	1550000	1510000	1570000	856000	1650000	1320000	1890000	962000	1360000	1460000
Fucose	2110000	2140000	2180000	1920000	1390000	2160000	2060000	2050000	1790000	2010000	2020000	2030000	2020000	2030000	2100000	2310000	2170000	2170000	2690000	2510000	2390000	2070000	2120000	2110000	1230000	1250000	1230000	1490000	1440000	1420000	2130000	2180000	2220000	2710000	2740000	2830000	2320000	2260000	2240000	1640000	1650000	1690000	1280000	2280000	1910000	2050000	1040000	1530000	1760000
Galactose	226000	238000	221000	355000	346000	368000	315000	339000	282000	217000	219000	226000	328000	383000	379000	2820000	2710000	2650000	366000	348000	316000	300000	342000	336000	231000	195000	225000	294000	298000	278000	414000	438000	461000	522000	527000	534000	661000	677000	700000	474000	386000	461000	201000	393000	338000	503000	241000	380000	390000
Glucose	541000	651000	528000	1020000	492000	1250000	1360000	1640000	851000	543000	534000	626000	766000	883000	925000	21700000	20800000	20800000	5580000	7620000	4440000	643000	695000	689000	342000	277000	265000	1050000	1080000	950000	1740000	1890000	2110000	999000	1120000	1390000	1240000	1280000	1280000	610000	583000	625000	580000	1180000	894000	810000	365000	584000	367000
Mannose	197000	242000	231000	159000	155000	169000	272000	284000	225000	147000	152000	145000	192000	221000	219000	668000	671000	675000	227000	190000	185000	252000	263000	252000	170000	167000	164000	299000	289000	262000	351000	362000	381000	488000	484000	530000	447000	457000	471000	308000	270000	306000	130000	272000	226000	376000	178000	289000	240000
Ribose	1120000	1280000	964000	777000	643000	916000	1450000	1490000	1490000	624000	674000	716000	615000	831000	730000	1580000	1440000	1540000	866000	620000	577000	1350000	1430000	1390000	730000	571000	645000	1580000	1680000	1270000	960000	1090000	1060000	996000	1010000	1130000	829000	1190000	1280000	803000	595000	741000	427000	636000	772000	916000	599000	1060000	633000
Xylose	1990000	1810000	1870000	842000	792000	809000	3940000	4020000	3630000	562000	506000	510000	649000	696000	825000	4480000	4170000	4070000	425000	419000	398000	3170000	3270000	3280000	401000	400000	407000	5460000	5250000	5110000	1490000	1380000	1360000	1000000	973000	1000000	880000	819000	765000	1040000	1060000	1060000	321000	646000	514000	1180000	567000	827000	930000
N-acetylglucosamine	329000	338000	342000	353000	253000	422000	339000	342000	317000	265000	263000	268000	340000	366000	375000	437000	448000	589000	325000	294000	268000	319000	334000	321000	157000	107000	147000	327000	336000	298000	345000	337000	335000	559000	609000	575000	515000	513000	557000	223000	169000	213000	187000	364000	304000	527000	260000	395000	210000
Maltose	130000	163000	162000	422000	115000	712000	173000	175000	162000	153000	135000	216000	409000	476000	498000	223000	210000	225000	295000	189000	182000	155000	163000	156000	77500	75600	67900	144000	141000	132000	351000	374000	389000	630000	749000	1050000	757000	828000	853000	357000	309000	356000	554000	1050000	793000	246000	88800	182000	86000
Sucrose	57500	64900	69800	79500	62800	89000	71000	69700	67500	56900	63200	68400	80100	88900	97000	68000	65700	69700	94500	81200	75800	63200	66300	63800	54600	59800	49700	62200	64100	59300	208000	217000	231000	127000	131000	149000	129000	133000	138000	119000	90400	118000	83700	161000	130000	132000	53500	101000	61300
Trehalose	302000	324000	331000	232000	221000	255000	439000	447000	409000	349000	340000	310000	239000	263000	267000	428000	425000	447000	368000	387000	369000	537000	524000	485000	192000	175000	185000	635000	602000	563000	754000	779000	791000	535000	537000	577000	318000	326000	312000	490000	501000	494000	145000	280000	237000	558000	272000	392000	427000
Alanine	10500000	10300000	10200000	11500000	11500000	11100000	11400000	11700000	11300000	12300000	12200000	12100000	9810000	9990000	10200000	13300000	13000000	12500000	14800000	14200000	13600000	12600000	12700000	12500000	12000000	11700000	11700000	10900000	10600000	10400000	11100000	11500000	11600000	9320000	9280000	9420000	8800000	8580000	8600000	9060000	9130000	9140000	7790000	13600000	11000000	11200000	6620000	8810000	10100000
Arginine	963000	986000	1020000	1900000	1830000	1790000	1970000	1960000	1710000	599000	578000	685000	825000	849000	841000	2430000	2450000	2510000	1010000	1140000	807000	741000	786000	738000	675000	648000	706000	599000	614000	588000	1820000	1860000	1900000	1420000	1410000	1440000	1100000	1080000	1060000	1840000	1850000	1850000	1230000	2090000	1840000	727000	483000	522000	602000
Aspartate	524000	530000	538000	419000	386000	474000	456000	468000	377000	302000	298000	316000	483000	499000	522000	723000	744000	675000	454000	437000	413000	430000	457000	448000	396000	383000	401000	346000	329000	328000	2320000	2410000	2450000	1390000	1340000	1270000	674000	644000	624000	2180000	2140000	2210000	341000	630000	556000	837000	411000	606000	1090000
Glutamate	2730000	3750000	4740000	8610000	8520000	7770000	7610000	7770000	7650000	1700000	1720000	1690000	3140000	3330000	4260000	7220000	6730000	6410000	1890000	1850000	1750000	1840000	1930000	1900000	7290000	7250000	7210000	1920000	1860000	1840000	7520000	7660000	7700000	3170000	3070000	3110000	2640000	2700000	2240000	4640000	4580000	4660000	2770000	4980000	3880000	2860000	1460000	2040000	3750000
Glycine	9910000	9620000	9550000	6860000	5110000	8520000	11000000	11100000	11800000	8320000	8340000	11800000	10100000	10200000	10600000	12900000	12700000	12500000	11600000	10400000	10700000	11800000	12200000	12100000	7970000	7770000	7860000	12900000	12500000	12000000	12700000	13100000	13400000	9400000	9390000	9970000	7160000	6980000	6780000	7560000	7730000	7770000	6720000	11600000	9710000	11000000	6320000	8250000	7500000
Isoleucine	13100000	13100000	13000000	14300000	14700000	13600000	17600000	17900000	16800000	17100000	17000000	16600000	10800000	10900000	11200000	15000000	14900000	14200000	20000000	19400000	18500000	15900000	16400000	16200000	13300000	13000000	13000000	15400000	14800000	14600000	14300000	14700000	14900000	10100000	10000000	9930000	10500000	10400000	10500000	10700000	10700000	10700000	8220000	13900000	11100000	7820000	4290000	6480000	9510000
Leucine	24500000	24500000	24100000	24700000	24800000	24300000	27100000	27600000	25500000	25500000	25600000	25300000	21700000	22200000	22700000	27700000	27000000	26100000	32300000	30800000	29400000	26800000	27500000	27000000	24700000	24100000	24000000	25400000	24400000	24200000	25800000	26600000	27000000	21900000	21900000	22000000	22400000	21900000	22000000	23100000	23300000	23400000	16200000	28400000	23300000	12800000	6760000	10900000	21100000
Lysine	860000	909000	922000	988000	1000000	1090000	1100000	1160000	1130000	993000	1010000	1060000	1010000	1080000	1030000	1350000	1420000	1290000	1100000	1180000	1100000	2980000	3540000	3320000	948000	872000	925000	2260000	2140000	2140000	3910000	4030000	4110000	3570000	3560000	3580000	1480000	1470000	1490000	3530000	3470000	3550000	2730000	4790000	3860000	1700000	876000	1220000	1370000
Methionine	1660000	1690000	1660000	1800000	1800000	1790000	2010000	2040000	1830000	2020000	2010000	1920000	1410000	1420000	1490000	2160000	2140000	2060000	2080000	1970000	1860000	1970000	2010000	1990000	1870000	1870000	1820000	1750000	1690000	1700000	1820000	1860000	1890000	1230000	1270000	1370000	1560000	1510000	1510000	1640000	1580000	1650000	1160000	2060000	1670000	1590000	830000	1220000	1490000
Phenylalanine	3050000	3030000	2980000	3170000	3160000	3070000	3590000	3660000	3370000	3480000	3490000	3490000	2580000	2650000	2690000	3680000	3680000	3450000	4230000	4080000	3860000	3470000	3640000	3560000	3190000	3090000	3100000	3420000	3280000	3240000	3080000	3210000	3230000	2540000	2510000	2540000	2460000	2420000	2430000	2740000	2730000	2770000	1860000	3330000	2630000	2790000	1540000	2050000	2500000
Proline	1770000	1750000	1720000	1690000	1720000	1530000	1830000	1850000	1720000	1940000	1990000	1850000	1610000	1610000	1630000	1760000	1740000	1650000	1650000	1630000	1570000	1680000	1760000	1760000	1880000	1850000	1830000	2330000	2230000	2210000	1490000	1530000	1540000	1010000	990000	1020000	755000	735000	748000	694000	704000	704000	595000	1080000	815000	974000	535000	709000	639000
Threonine	3140000	3200000	3280000	3430000	3240000	3470000	4000000	4050000	3810000	1470000	1460000	1480000	3140000	3290000	3380000	4210000	4160000	4090000	2130000	1880000	1800000	1680000	1740000	1700000	3010000	2940000	2960000	1950000	2030000	1960000	3850000	3980000	4060000	3850000	3870000	4040000	3670000	3560000	3540000	3710000	3830000	3760000	2470000	4380000	3570000	2540000	1380000	1990000	3670000
Tryptophan	869000	855000	854000	829000	818000	816000	881000	904000	817000	876000	872000	869000	739000	766000	784000	861000	849000	807000	317000	267000	209000	923000	962000	939000	770000	756000	763000	824000	785000	783000	899000	945000	947000	886000	892000	909000	862000	841000	840000	840000	811000	846000	539000	997000	805000	997000	502000	722000	372000
Tyrosine	4830000	4890000	4760000	4280000	4260000	4210000	4950000	5060000	4710000	4930000	4930000	4840000	3890000	4070000	4140000	5130000	5270000	4740000	5550000	5320000	5010000	4790000	5070000	4920000	3440000	3190000	3140000	4720000	4530000	4480000	4600000	4750000	4800000	3780000	3810000	3860000	3410000	3340000	3390000	4050000	4100000	4080000	2780000	5190000	4060000	3600000	1910000	2590000	1160000
Valine	8320000	8280000	8070000	8620000	8710000	8270000	9370000	9610000	9360000	10000000	10000000	9850000	7020000	7130000	7270000	8810000	8700000	8160000	11700000	11400000	10800000	9930000	10300000	10200000	8740000	8470000	8440000	9450000	9050000	8930000	8100000	8370000	8470000	6410000	6420000	6480000	6730000	6600000	6650000	6900000	6940000	6950000	5050000	8660000	6990000	4900000	2710000	4130000	6510000
Uracil	240000	198000	203000	242000	243000	256000	389000	405000	358000	287000	281000	318000	188000	200000	194000	548000	540000	534000	383000	390000	359000	340000	357000	339000	160000	146000	118000	476000	450000	446000	282000	293000	296000	167000	168000	171000	257000	248000	279000	69000	44700	63100	135000	282000	191000	133000	58900	93500	86300
Succinate	46700000	47200000	45400000	3770000	3740000	3720000	3930000	3970000	3410000	55100000	48700000	16300000	3410000	3500000	3650000	45900000	43100000	42800000	32700000	29500000	31900000	37400000	40700000	38600000	4290000	4250000	4180000	3780000	3630000	3650000	25000000	25300000	25300000	30100000	30700000	32600000	14700000	14500000	15300000	3570000	3380000	3560000	2030000	3590000	2970000	5000000	2750000	3680000	27300000
Lactate	61600000	76400000	71700000	44100000	28500000	60900000	47500000	49200000	44800000	42900000	42400000	34000000	49400000	55000000	62100000	46100000	45200000	44600000	92000000	84700000	86300000	26900000	26500000	27900000	15100000	15200000	15200000	18500000	19300000	19300000	49800000	52600000	55400000	221000000	231000000	259000000	185000000	179000000	180000000	137000000	152000000	142000000	136000000	238000000	192000000	13200000	7300000	9750000	145000000
5-aminovalerate	1770000	1780000	1810000	2130000	1970000	2440000	2260000	2330000	1980000	1360000	1360000	1460000	1790000	1850000	1920000	2220000	2090000	2130000	1960000	1950000	1870000	1360000	1370000	1320000	1370000	1380000	1370000	1620000	1580000	1560000	1820000	1850000	1900000	2800000	2770000	2810000	3210000	3140000	3110000	3070000	2960000	3080000	1630000	2980000	2510000	3880000	2030000	2860000	2780000
Formate	2560000	2690000	2650000	2600000	1570000	4070000	2220000	2090000	1680000	4280000	4670000	3480000	3200000	3680000	3020000	265000	144000	79600	1920000	1520000	1370000	1790000	1740000	1810000	50500	41800	43600	2060000	1950000	2130000	2900000	3390000	3350000	5760000	5820000	5470000	2120000	2000000	2300000	6680000	6510000	6590000	29600	122000	68000	1410000	826000	1270000	5970000
Acetate	138000000	148000000	129000000	159000000	152000000	163000000	81700000	83100000	72900000	174000000	172000000	138000000	134000000	139000000	140000000	191000000	184000000	179000000	227000000	220000000	208000000	162000000	178000000	169000000	198000000	196000000	197000000	63400000	58200000	57500000	89700000	101000000	104000000	357000000	366000000	392000000	367000000	355000000	353000000	312000000	328000000	324000000	180000000	321000000	254000000	284000000	171000000	215000000	353000000
Propionate	1460000	1450000	1470000	4780000	4550000	4220000	4260000	4380000	4060000	4080000	4150000	7020000	2910000	3010000	3110000	2680000	2580000	2550000	19300000	17300000	17600000	3920000	3940000	3920000	4510000	4440000	4420000	5190000	4960000	4790000	1800000	1910000	1910000	1420000	1430000	1420000	3460000	3400000	3370000	3580000	3500000	3630000	7410000	13300000	12000000	7230000	4130000	5390000	2460000
Butyrate	30100000	30000000	28100000	22300000	20700000	18700000	29800000	30800000	30500000	29800000	30800000	32700000	26600000	26100000	25900000	12900000	11100000	10400000	11100000	11300000	12300000	28500000	29300000	28600000	19700000	18900000	18500000	38400000	38100000	36200000	27600000	28200000	28000000	3900000	3770000	3500000	4580000	4510000	4140000	7800000	7670000	7980000	3330000	5910000	5320000	19900000	11400000	14700000	9810000
Valerate	2320000	2390000	2420000	2700000	2420000	2850000	2270000	2320000	2040000	1950000	1920000	2060000	2090000	2170000	2180000	2570000	2480000	2450000	2300000	2300000	2220000	3560000	3940000	3750000	1970000	1900000	1920000	3340000	3170000	3180000	4230000	4300000	4380000	4030000	3940000	3890000	2270000	2180000	2150000	3580000	3550000	3620000	2420000	4190000	3540000	8210000	4700000	5890000	2010000
Isobutyrate	538000	572000	565000	1380000	1200000	959000	911000	971000	965000	847000	893000	1570000	743000	733000	752000	1020000	926000	727000	4140000	3740000	3430000	966000	1250000	1250000	1320000	1000000	1140000	1140000	1170000	1110000	524000	565000	554000	688000	700000	676000	1200000	1220000	1220000	1060000	1000000	1080000	1590000	3200000	2800000	5090000	2230000	2870000	1020000
Isovalerate	4540000	4890000	4890000	4100000	4080000	4080000	3260000	3410000	2650000	2540000	2490000	2750000	3500000	3620000	3900000	4700000	4450000	4570000	3560000	3260000	3180000	4230000	4390000	4120000	4040000	3820000	3920000	3720000	3780000	3520000	3990000	4020000	4190000	6110000	5850000	5740000	4900000	4850000	4730000	4050000	3980000	4120000	2050000	4380000	3530000	18700000	9730000	11900000	4390000
Ethanol	212000000	209000000	196000000	104000000	104000000	70200000	95600000	82400000	54100000	108000000	109000000	77200000	113000000	110000000	99600000	149000000	128000000	126000000	151000000	146000000	130000000	199000000	223000000	205000000	218000000	232000000	221000000	107000000	101000000	97000000	112000000	112000000	109000000	208000000	209000000	227000000	135000000	112000000	80800000	77000000	76200000	99300000	50400000	88400000	75400000	140000000	88600000	107000000	165000000
Methanol	5030000	4850000	4660000	4750000	4720000	4470000	5000000	5360000	5520000	4770000	5010000	5200000	3680000	3730000	3920000	4850000	4560000	4070000	3420000	3270000	3320000	3990000	4010000	4100000	4610000	4410000	4530000	7160000	6790000	6730000	3810000	4260000	4220000	3310000	3460000	3480000	3660000	3710000	3970000	4120000	4280000	3860000	2890000	5190000	4410000	4140000	2660000	3140000	2940000
Trimethylamine	3090000	3040000	2910000	3430000	3900000	2390000	1450000	1470000	1250000	3790000	3830000	2300000	2520000	2410000	2390000	4680000	4520000	4440000	3120000	3620000	3530000	2440000	2580000	2570000	7980000	7800000	7760000	4790000	4620000	4640000	2570000	2650000	2690000	2630000	2550000	2400000	2230000	2160000	2080000	1040000	931000	1050000	837000	1520000	1140000	3040000	1750000	2220000	3100000
Glycolate	3930000	3940000	4020000	4680000	4530000	4700000	4160000	4190000	3810000	3880000	3880000	4030000	4030000	4160000	4350000	4940000	4970000	4880000	5180000	4750000	4520000	3910000	3990000	3900000	3470000	3350000	3380000	5000000	4890000	4830000	4330000	4450000	4550000	4640000	4580000	4740000	5060000	4990000	4990000	4220000	4170000	4260000	3160000	5570000	4730000	5430000	2760000	3940000	3250000
Phenylacetate	317000	319000	336000	376000	380000	359000	326000	330000	290000	279000	276000	271000	264000	274000	286000	436000	445000	425000	357000	376000	345000	363000	372000	364000	361000	330000	343000	272000	265000	250000	383000	390000	399000	372000	370000	362000	398000	399000	400000	319000	299000	324000	229000	410000	339000	366000	187000	267000	310000
MEM vs no antibiotics
Peak	D1_MEM_1	D1_MEM_2	D1_MEM_3	D2_MEM_1	D2_MEM_2	D2_MEM_3	D3_MEM_1	D3_MEM_2	D3_MEM_3	D4_MEM_1	D4_MEM_2	D4_MEM_3	D5_MEM_1	D5_MEM_2	D5_MEM_3	D6_MEM_1	D6_MEM_2	D6_MEM_3	D7_MEM_1	D7_MEM_2	D7_MEM_3	D8_MEM_1	D8_MEM_2	D8_MEM_3	D9_MEM_1	D9_MEM_2	D9_MEM_3	D10_MEM_1	D10_MEM_2	D10_MEM_3	D11_MEM_1	D11_MEM_2	D11_MEM_3	D1_No_abx_1	D1_No_abx_2	D1_No_abx_3	D2_No_abx_1	D2_No_abx_2	D2_No_abx_3	D3_No_abx_1	D3_No_abx_2	D3_No_abx_3	D4_No_abx_1	D4_No_abx_2	D4_No_abx_3	D5_No_abx_1	D5_No_abx_2	D5_No_abx_3	D6_No_abx_1
Arabinose	1810000	1900000	1920000	2480000	2260000	2330000	1810000	1690000	1610000	1620000	1510000	1560000	1580000	1470000	1550000	1650000	1500000	1610000	1990000	1860000	1990000	1930000	2240000	1930000	2340000	2380000	2370000	2000000	2070000	2080000	2100000	1980000	2040000	2250000	2230000	2250000	2380000	2280000	2250000	1890000	1790000	1920000	1150000	2390000	1900000	2690000	1180000	1820000	1570000
Fructose	1290000	1380000	1390000	1760000	1660000	1670000	1840000	1790000	1650000	1380000	1310000	1350000	1640000	1570000	1570000	1900000	1790000	1910000	3560000	3460000	3750000	3440000	3350000	3480000	2070000	2070000	2020000	2020000	2110000	2080000	2520000	2560000	2730000	1590000	1590000	1620000	1670000	1620000	1610000	1550000	1510000	1570000	856000	1650000	1320000	1890000	962000	1360000	1460000
Fucose	2240000	2360000	2370000	2530000	2390000	2480000	2380000	2220000	2180000	2420000	2300000	2300000	2260000	2200000	2230000	2150000	2040000	2140000	2770000	2700000	2880000	2310000	2640000	2310000	2630000	2660000	2660000	1750000	1770000	1780000	2340000	2250000	2310000	2710000	2740000	2830000	2320000	2260000	2240000	1640000	1650000	1690000	1280000	2280000	1910000	2050000	1040000	1530000	1760000
Galactose	663000	518000	989000	1290000	1170000	1240000	2190000	2140000	2130000	1280000	1320000	1360000	400000	370000	386000	2170000	2080000	2240000	1950000	1880000	2000000	2020000	2250000	2000000	600000	658000	441000	1580000	1700000	1690000	1460000	1490000	1510000	522000	527000	534000	661000	677000	700000	474000	386000	461000	201000	393000	338000	503000	241000	380000	390000
Glucose	2010000	1630000	3840000	13200000	12500000	11700000	19300000	18200000	19600000	16300000	16600000	18200000	1160000	899000	1040000	14300000	13300000	13800000	26400000	25500000	27200000	14900000	17100000	14400000	1900000	2050000	1950000	14800000	16300000	16100000	12600000	12700000	12700000	999000	1120000	1390000	1240000	1280000	1280000	610000	583000	625000	580000	1180000	894000	810000	365000	584000	367000
Mannose	221000	244000	235000	235000	167000	229000	481000	452000	433000	192000	204000	197000	406000	396000	338000	467000	456000	517000	538000	505000	539000	567000	482000	559000	278000	277000	282000	420000	432000	428000	527000	515000	519000	488000	484000	530000	447000	457000	471000	308000	270000	306000	130000	272000	226000	376000	178000	289000	240000
Ribose	1380000	1440000	1370000	1590000	1160000	1510000	1880000	1870000	1630000	1330000	1480000	1120000	828000	975000	788000	1280000	1300000	1860000	1730000	1800000	1810000	1680000	1710000	1460000	1170000	1040000	1130000	1570000	1630000	1710000	1370000	1680000	1560000	996000	1010000	1130000	829000	1190000	1280000	803000	595000	741000	427000	636000	772000	916000	599000	1060000	633000
Xylose	3590000	3980000	3640000	1230000	1210000	1250000	3500000	3380000	3320000	2010000	2060000	2100000	957000	921000	1150000	3990000	3750000	3750000	962000	882000	955000	3290000	3730000	3330000	1890000	1830000	1910000	5480000	5560000	5300000	2590000	2620000	2510000	1000000	973000	1000000	880000	819000	765000	1040000	1060000	1060000	321000	646000	514000	1180000	567000	827000	930000
N-acetylglucosamine	393000	499000	419000	481000	419000	456000	545000	515000	494000	326000	357000	328000	359000	342000	343000	413000	406000	466000	1260000	1190000	1250000	909000	897000	865000	370000	361000	333000	461000	472000	448000	481000	531000	516000	559000	609000	575000	515000	513000	557000	223000	169000	213000	187000	364000	304000	527000	260000	395000	210000
Maltose	199000	132000	256000	798000	572000	633000	353000	313000	274000	445000	399000	391000	658000	554000	584000	199000	170000	298000	354000	361000	362000	309000	365000	288000	343000	363000	367000	166000	174000	179000	1020000	927000	984000	630000	749000	1050000	757000	828000	853000	357000	309000	356000	554000	1050000	793000	246000	88800	182000	86000
Sucrose	52800	54900	64900	160000	99400	135000	128000	120000	88000	88400	85200	81300	107000	95000	90900	68000	65000	116000	142000	146000	148000	128000	141000	120000	79400	77700	82600	69700	69200	69700	698000	355000	547000	127000	131000	149000	129000	133000	138000	119000	90400	118000	83700	161000	130000	132000	53500	101000	61300
Trehalose	461000	463000	490000	314000	302000	330000	448000	444000	402000	387000	386000	362000	456000	466000	400000	353000	331000	365000	446000	434000	439000	447000	506000	443000	543000	532000	551000	317000	300000	300000	733000	700000	734000	535000	537000	577000	318000	326000	312000	490000	501000	494000	145000	280000	237000	558000	272000	392000	427000
Alanine	12100000	12900000	12600000	11600000	11500000	11800000	12600000	12600000	13000000	14100000	14100000	14100000	10500000	10500000	10700000	11500000	11500000	11200000	16200000	15100000	16100000	12500000	13100000	12400000	12200000	12200000	12500000	12900000	13100000	13400000	10800000	11000000	10800000	9320000	9280000	9420000	8800000	8580000	8600000	9060000	9130000	9140000	7790000	13600000	11000000	11200000	6620000	8810000	10100000
Arginine	1170000	1240000	1430000	2330000	2290000	2400000	3430000	3420000	3330000	1810000	1980000	2020000	1000000	979000	960000	2140000	2090000	1940000	2600000	2380000	2260000	2110000	2300000	2060000	1440000	1450000	1430000	1910000	2030000	2050000	2350000	2420000	2410000	1420000	1410000	1440000	1100000	1080000	1060000	1840000	1850000	1850000	1230000	2090000	1840000	727000	483000	522000	602000
Aspartate	562000	713000	614000	652000	626000	603000	568000	567000	541000	424000	438000	459000	966000	913000	895000	658000	727000	646000	592000	528000	566000	669000	696000	651000	583000	588000	575000	523000	552000	579000	2090000	2130000	2070000	1390000	1340000	1270000	674000	644000	624000	2180000	2140000	2210000	341000	630000	556000	837000	411000	606000	1090000
Glutamate	7890000	8530000	8010000	7150000	7120000	7330000	7940000	7810000	7760000	9270000	8520000	8670000	6690000	6520000	6480000	6370000	6300000	6120000	5940000	5570000	6050000	5760000	6220000	5680000	7190000	7080000	7280000	7980000	8240000	8370000	6690000	6600000	6520000	3170000	3070000	3110000	2640000	2700000	2240000	4640000	4580000	4660000	2770000	4980000	3880000	2860000	1460000	2040000	3750000
Glycine	12000000	12600000	12200000	8240000	8070000	7640000	13600000	13100000	13800000	14000000	12800000	13300000	12200000	11900000	12300000	11200000	11000000	10900000	16400000	15300000	16700000	12200000	13000000	12200000	11100000	11200000	11300000	14200000	14600000	15000000	13100000	13000000	13200000	9400000	9390000	9970000	7160000	6980000	6780000	7560000	7730000	7770000	6720000	11600000	9710000	11000000	6320000	8250000	7500000
Isoleucine	14900000	16400000	15500000	15300000	15100000	15500000	18600000	18800000	19000000	20100000	20100000	20100000	12200000	12100000	12300000	13000000	13400000	12800000	22600000	21000000	22000000	15800000	16900000	15700000	13900000	13800000	14000000	16200000	16700000	17100000	14700000	15200000	14700000	10100000	10000000	9930000	10500000	10400000	10500000	10700000	10700000	10700000	8220000	13900000	11100000	7820000	4290000	6480000	9510000
Leucine	25800000	27400000	27200000	26300000	25800000	26300000	28900000	28100000	28900000	30000000	29300000	29400000	23800000	23400000	23800000	24900000	25000000	24300000	32400000	30500000	32500000	27300000	29200000	26900000	26000000	26000000	26100000	27400000	28000000	28400000	27200000	27000000	27100000	21900000	21900000	22000000	22400000	21900000	22000000	23100000	23300000	23400000	16200000	28400000	23300000	12800000	6760000	10900000	21100000
Lysine	978000	1310000	1040000	2420000	2300000	2290000	1380000	1560000	1450000	1290000	1350000	1400000	3670000	3560000	3700000	2470000	2670000	2490000	1950000	1690000	1750000	4130000	4480000	4060000	2940000	3000000	2600000	3140000	3210000	3250000	4250000	4260000	4280000	3570000	3560000	3580000	1480000	1470000	1490000	3530000	3470000	3550000	2730000	4790000	3860000	1700000	876000	1220000	1370000
Methionine	1830000	1690000	1960000	2040000	1980000	2050000	2340000	2320000	2340000	2410000	2340000	2360000	1610000	1580000	1590000	1930000	1930000	1920000	2470000	2330000	2480000	2170000	2290000	2140000	2110000	2100000	2120000	2200000	2260000	2260000	2040000	2100000	2030000	1230000	1270000	1370000	1560000	1510000	1510000	1640000	1580000	1650000	1160000	2060000	1670000	1590000	830000	1220000	1490000
Phenylalanine	3360000	3640000	3520000	3340000	3290000	3350000	3850000	3860000	3940000	4080000	4040000	4100000	2820000	2770000	2890000	3250000	3370000	3190000	4600000	4230000	4510000	3620000	3790000	3530000	3310000	3330000	3340000	3700000	3790000	3870000	3280000	3420000	3300000	2540000	2510000	2540000	2460000	2420000	2430000	2740000	2730000	2770000	1860000	3330000	2630000	2790000	1540000	2050000	2500000
Proline	1910000	2050000	1960000	1630000	1650000	1650000	1770000	1740000	1840000	2190000	2120000	2130000	1650000	1640000	1650000	1470000	1540000	1410000	1840000	1730000	1880000	1540000	1680000	1530000	1740000	1730000	1740000	2040000	2080000	2120000	1500000	1510000	1490000	1010000	990000	1020000	755000	735000	748000	694000	704000	704000	595000	1080000	815000	974000	535000	709000	639000
Threonine	3800000	4000000	3990000	3900000	3860000	3850000	4290000	4230000	4390000	4520000	4570000	4600000	3840000	3730000	3780000	3590000	3590000	3450000	4520000	4100000	4270000	3840000	4190000	3800000	4140000	4160000	4200000	4070000	4200000	4320000	4690000	4380000	4570000	3850000	3870000	4040000	3670000	3560000	3540000	3710000	3830000	3760000	2470000	4380000	3570000	2540000	1380000	1990000	3670000
Tryptophan	917000	974000	972000	940000	900000	932000	1040000	1020000	1020000	964000	958000	977000	803000	802000	812000	712000	738000	725000	1180000	1100000	1170000	985000	1050000	970000	938000	939000	952000	893000	911000	923000	997000	995000	990000	886000	892000	909000	862000	841000	840000	840000	811000	846000	539000	997000	805000	997000	502000	722000	372000
Tyrosine	5280000	5670000	5550000	4520000	4490000	4490000	5610000	5710000	5860000	5910000	5880000	5990000	4270000	4220000	4330000	4510000	4820000	4400000	7040000	6350000	6730000	4670000	4760000	4480000	1550000	1600000	1660000	5190000	5350000	5420000	4810000	4960000	4790000	3780000	3810000	3860000	3410000	3340000	3390000	4050000	4100000	4080000	2780000	5190000	4060000	3600000	1910000	2590000	1160000
Valine	9310000	10100000	9680000	8560000	8500000	8680000	9350000	9520000	9940000	10700000	10700000	10900000	7300000	7210000	7330000	8030000	8330000	7810000	11500000	10600000	11200000	8720000	9160000	8660000	8180000	8130000	8260000	9430000	9660000	10000000	8440000	8510000	8390000	6410000	6420000	6480000	6730000	6600000	6650000	6900000	6940000	6950000	5050000	8660000	6990000	4900000	2710000	4130000	6510000
Uracil	214000	230000	227000	367000	340000	356000	525000	537000	527000	502000	482000	524000	147000	167000	209000	429000	439000	446000	595000	569000	611000	567000	568000	544000	333000	327000	343000	535000	555000	577000	282000	325000	305000	167000	168000	171000	257000	248000	279000	69000	44700	63100	135000	282000	191000	133000	58900	93500	86300
Succinate	48200000	49100000	50500000	38200000	37800000	39400000	26000000	24200000	23000000	25100000	21800000	21500000	12000000	10600000	12000000	36800000	35000000	35500000	25500000	24200000	26400000	15700000	17800000	13600000	42000000	41600000	43200000	42600000	41800000	41000000	16100000	14700000	15400000	30100000	30700000	32600000	14700000	14500000	15300000	3570000	3380000	3560000	2030000	3590000	2970000	5000000	2750000	3680000	27300000
Lactate	57900000	58200000	60200000	95500000	92100000	95600000	65100000	63000000	71000000	82200000	68200000	78300000	95600000	85500000	89500000	59600000	58500000	58200000	63600000	60400000	64000000	45500000	46400000	45100000	140000000	141000000	142000000	38300000	38500000	39400000	47300000	45300000	45000000	221000000	231000000	259000000	185000000	179000000	180000000	137000000	152000000	142000000	136000000	238000000	192000000	13200000	7300000	9750000	145000000
5-aminovalerate	1800000	1780000	2000000	2120000	2000000	2090000	2290000	2190000	2100000	1950000	1890000	1840000	1900000	1840000	1900000	2090000	1950000	2110000	3120000	3020000	3230000	1950000	2270000	1940000	1820000	1910000	1830000	2270000	2290000	2240000	2110000	2010000	2090000	2800000	2770000	2810000	3210000	3140000	3110000	3070000	2960000	3080000	1630000	2980000	2510000	3880000	2030000	2860000	2780000
Formate	7700000	8060000	8680000	7530000	7380000	6680000	1470000	1460000	1650000	5060000	3960000	5030000	2760000	2440000	2540000	85400	109000	85500	1120000	1180000	1100000	233000	3270000	239000	4620000	5360000	4850000	754000	730000	851000	3560000	3780000	4050000	5760000	5820000	5470000	2120000	2000000	2300000	6680000	6510000	6590000	29600	122000	68000	1410000	826000	1270000	5970000
Acetate	130000000	128000000	140000000	119000000	121000000	128000000	144000000	138000000	140000000	141000000	153000000	155000000	84200000	76700000	79100000	186000000	181000000	184000000	150000000	145000000	156000000	179000000	178000000	177000000	123000000	123000000	128000000	84800000	87700000	88900000	115000000	114000000	118000000	357000000	366000000	392000000	367000000	355000000	353000000	312000000	328000000	324000000	180000000	321000000	254000000	284000000	171000000	215000000	353000000
Propionate	1500000	1510000	1610000	1980000	1910000	2080000	3190000	3130000	3110000	4390000	4190000	4160000	2040000	2060000	2100000	2490000	2410000	2540000	7320000	7110000	7630000	4620000	4480000	4620000	2230000	2180000	2300000	3980000	4070000	4080000	2260000	2220000	2250000	1420000	1430000	1420000	3460000	3400000	3370000	3580000	3500000	3630000	7410000	13300000	12000000	7230000	4130000	5390000	2460000
Butyrate	22200000	24600000	21500000	12000000	12000000	13200000	13100000	12800000	11100000	13900000	13200000	11200000	22300000	23300000	24100000	16300000	16300000	15000000	4380000	4390000	4780000	7750000	7620000	7700000	5060000	4820000	5560000	22200000	22200000	22700000	16300000	15500000	15600000	3900000	3770000	3500000	4580000	4510000	4140000	7800000	7670000	7980000	3330000	5910000	5320000	19900000	11400000	14700000	9810000
Valerate	3870000	3840000	4160000	3020000	3170000	3320000	2950000	2680000	2590000	2320000	2110000	1850000	4450000	4390000	4320000	4320000	4000000	3910000	2210000	2300000	2380000	3180000	3460000	3250000	2950000	3020000	3040000	3610000	3560000	3660000	3760000	3360000	3680000	3900000	3720000	3580000	3380000	3340000	3220000	3170000	3270000	3190000	1650000	2760000	2480000	12100000	7080000	8750000	3900000
Isobutyrate	592000	628000	659000	809000	795000	604000	742000	628000	725000	913000	851000	938000	621000	465000	613000	878000	835000	884000	1870000	1620000	2010000	1470000	1460000	1300000	848000	875000	860000	977000	1070000	1060000	555000	554000	594000	688000	700000	676000	1200000	1220000	1220000	1060000	1000000	1080000	1590000	3200000	2800000	5090000	2230000	2870000	1020000
Isovalerate	4620000	4880000	5110000	5000000	4870000	5090000	3750000	3540000	3340000	2800000	2820000	2690000	3780000	3710000	3720000	4450000	4070000	4430000	4320000	4200000	4320000	4830000	4990000	4800000	4540000	4550000	4660000	3600000	3610000	3670000	4520000	4210000	4610000	6110000	5850000	5740000	4900000	4850000	4730000	4050000	3980000	4120000	2050000	4380000	3530000	18700000	9730000	11900000	4390000
Ethanol	217000000	220000000	242000000	145000000	144000000	126000000	93000000	73300000	70600000	74600000	82300000	84000000	95900000	102000000	112000000	142000000	129000000	126000000	132000000	128000000	150000000	187000000	247000000	193000000	215000000	223000000	235000000	101000000	108000000	108000000	107000000	101000000	110000000	208000000	209000000	227000000	135000000	112000000	80800000	77000000	76200000	99300000	50400000	88400000	75400000	140000000	88600000	107000000	165000000
Methanol	4670000	4730000	4760000	4190000	4250000	4350000	4230000	4230000	4770000	5360000	5310000	5210000	3640000	3500000	3850000	5080000	5200000	4850000	3180000	2960000	2870000	3270000	2970000	3150000	3090000	3290000	3110000	7160000	7400000	7920000	4050000	4120000	4000000	3310000	3460000	3480000	3660000	3710000	3970000	4120000	4280000	3860000	2890000	5190000	4410000	4140000	2660000	3140000	2940000
Trimethylamine	4280000	4540000	4450000	4080000	4050000	3980000	1310000	1250000	1200000	2380000	2640000	2480000	3140000	3090000	3140000	4290000	4180000	4220000	2640000	2510000	2730000	2290000	2270000	2290000	3830000	3920000	4320000	4090000	4180000	4240000	2120000	2060000	2130000	2630000	2550000	2400000	2230000	2160000	2080000	1040000	931000	1050000	837000	1520000	1140000	3040000	1750000	2220000	3100000
Glycolate	4310000	4510000	4570000	6080000	5800000	5810000	5470000	5380000	5360000	5190000	5290000	5290000	4480000	4260000	4490000	4260000	4160000	4240000	6710000	6100000	6690000	5190000	5650000	5070000	5480000	5670000	5610000	5500000	5630000	5680000	5200000	5170000	5230000	4640000	4580000	4740000	5060000	4990000	4990000	4220000	4170000	4260000	3160000	5570000	4730000	5430000	2760000	3940000	3250000
Phenylacetate	324000	351000	351000	549000	535000	529000	373000	384000	362000	312000	292000	287000	291000	288000	298000	395000	382000	409000	448000	432000	444000	555000	567000	545000	436000	441000	435000	339000	347000	351000	437000	419000	438000	372000	370000	362000	398000	399000	400000	319000	299000	324000	229000	410000	339000	366000	187000	267000	310000
ETP vs no antibiotics
Peak	D1_ETP_1	D1_ETP_2	D1_ETP_3	D2_ETP_1	D2_ETP_2	D2_ETP_3	D3_ETP_1	D3_ETP_2	D3_ETP_3	D4_ETP_1	D4_ETP_2	D4_ETP_3	D5_ETP_1	D5_ETP_2	D5_ETP_3	D6_ETP_1	D6_ETP_2	D6_ETP_3	D7_ETP_1	D7_ETP_2	D7_ETP_3	D8_ETP_1	D8_ETP_2	D8_ETP_3	D9_ETP_1	D9_ETP_2	D9_ETP_3	D10_ETP_1	D10_ETP_2	D10_ETP_3	D11_ETP_1	D11_ETP_2	D11_ETP_3	D1_No_abx_1	D1_No_abx_2	D1_No_abx_3	D2_No_abx_1	D2_No_abx_2	D2_No_abx_3	D3_No_abx_1	D3_No_abx_2	D3_No_abx_3	D4_No_abx_1	D4_No_abx_2	D4_No_abx_3	D5_No_abx_1	D5_No_abx_2	D5_No_abx_3	D6_No_abx_1
Arabinose	2010000	2120000	2190000	2640000	2480000	2450000	1940000	1830000	1920000	1970000	2100000	2310000	1930000	2080000	2060000	1870000	1970000	2100000	2380000	2230000	2190000	2120000	2100000	2050000	2520000	2530000	2570000	2560000	2610000	2490000	2110000	2040000	2320000	2250000	2230000	2250000	2380000	2280000	2250000	1890000	1790000	1920000	1150000	2390000	1900000	2690000	1180000	1820000	1570000
Fructose	2110000	2250000	2260000	2610000	2280000	1950000	2690000	2580000	2770000	3080000	3320000	3570000	1880000	1870000	1880000	4010000	4100000	4000000	2840000	2680000	2670000	3780000	3770000	3790000	2350000	2290000	2350000	4590000	4570000	4290000	5320000	5090000	5630000	1590000	1590000	1620000	1670000	1620000	1610000	1550000	1510000	1570000	856000	1650000	1320000	1890000	962000	1360000	1460000
Fucose	2580000	2680000	2670000	1740000	1640000	1650000	2290000	2220000	2270000	2260000	2450000	2600000	2270000	2360000	2360000	2360000	2390000	2520000	2720000	2560000	2550000	2520000	2520000	2400000	2840000	2900000	2920000	2080000	2070000	2000000	2360000	2270000	2460000	2710000	2740000	2830000	2320000	2260000	2240000	1640000	1650000	1690000	1280000	2280000	1910000	2050000	1040000	1530000	1760000
Galactose	2000000	2080000	2000000	1760000	1630000	1650000	2830000	2780000	2920000	1950000	2060000	2130000	1350000	1440000	1410000	2880000	2970000	3150000	2120000	2030000	1920000	2100000	2120000	2060000	1440000	1420000	1490000	2300000	2310000	2250000	1960000	1940000	2100000	522000	527000	534000	661000	677000	700000	474000	386000	461000	201000	393000	338000	503000	241000	380000	390000
Glucose	28500000	29000000	28700000	49600000	32400000	17500000	28800000	27300000	28100000	31200000	32700000	35700000	17200000	16900000	16400000	22400000	23100000	26100000	26600000	24800000	25200000	15500000	16700000	15800000	7580000	7390000	8410000	32400000	34200000	32800000	19800000	19100000	23900000	999000	1120000	1390000	1240000	1280000	1280000	610000	583000	625000	580000	1180000	894000	810000	365000	584000	367000
Mannose	686000	731000	713000	585000	540000	336000	574000	566000	623000	859000	936000	942000	482000	506000	512000	846000	865000	951000	463000	443000	384000	563000	596000	532000	508000	476000	525000	689000	683000	644000	695000	700000	826000	488000	484000	530000	447000	457000	471000	308000	270000	306000	130000	272000	226000	376000	178000	289000	240000
Ribose	1440000	1750000	1380000	1720000	1760000	1590000	1850000	1980000	2000000	1930000	1980000	1900000	993000	1120000	1060000	1860000	1740000	2150000	1550000	1780000	1380000	1610000	1730000	1590000	1590000	1540000	1620000	2240000	2030000	2080000	1700000	1670000	1700000	996000	1010000	1130000	829000	1190000	1280000	803000	595000	741000	427000	636000	772000	916000	599000	1060000	633000
Xylose	3690000	3820000	3800000	1420000	1280000	1380000	4000000	3870000	4090000	2040000	2250000	2270000	1410000	1410000	1380000	4280000	4430000	4720000	973000	901000	890000	3380000	3470000	3380000	2160000	2150000	2250000	5770000	5720000	5600000	3170000	2990000	3320000	1000000	973000	1000000	880000	819000	765000	1040000	1060000	1060000	321000	646000	514000	1180000	567000	827000	930000
N-acetylglucosamine	1050000	1120000	1080000	639000	567000	404000	1260000	1250000	1310000	931000	991000	1080000	409000	434000	416000	1060000	1120000	1120000	529000	537000	492000	1040000	1040000	1020000	476000	456000	483000	1060000	1070000	662000	533000	549000	775000	559000	609000	575000	515000	513000	557000	223000	169000	213000	187000	364000	304000	527000	260000	395000	210000
Maltose	339000	368000	360000	2660000	1370000	477000	374000	353000	335000	568000	577000	663000	1080000	1180000	1180000	316000	328000	418000	340000	345000	253000	313000	330000	242000	733000	736000	761000	378000	388000	372000	1110000	1090000	1270000	630000	749000	1050000	757000	828000	853000	357000	309000	356000	554000	1050000	793000	246000	88800	182000	86000
Sucrose	129000	141000	134000	524000	260000	136000	142000	135000	128000	173000	171000	187000	138000	188000	197000	124000	127000	146000	139000	148000	102000	125000	133000	90400	157000	149000	157000	169000	175000	173000	955000	843000	963000	127000	131000	149000	129000	133000	138000	119000	90400	118000	83700	161000	130000	132000	53500	101000	61300
Trehalose	509000	533000	535000	345000	320000	335000	451000	437000	488000	332000	379000	394000	452000	441000	437000	515000	486000	522000	445000	418000	400000	499000	535000	514000	542000	549000	558000	488000	489000	406000	645000	640000	737000	535000	537000	577000	318000	326000	312000	490000	501000	494000	145000	280000	237000	558000	272000	392000	427000
Alanine	13000000	13200000	12900000	11200000	10400000	10700000	13300000	13400000	14300000	13400000	14500000	15000000	10200000	10200000	10100000	13500000	13700000	14100000	15900000	14600000	14900000	12600000	12500000	13000000	12900000	12900000	13200000	15300000	15400000	15000000	10900000	10400000	11500000	9320000	9280000	9420000	8800000	8580000	8600000	9060000	9130000	9140000	7790000	13600000	11000000	11200000	6620000	8810000	10100000
Arginine	2720000	2890000	2990000	3940000	3030000	2420000	3790000	3570000	3680000	2070000	2330000	2530000	2020000	1850000	1830000	2770000	2460000	2630000	2250000	1910000	2170000	2140000	2300000	2260000	1550000	1390000	1630000	2690000	2700000	2690000	2580000	2400000	2740000	1420000	1410000	1440000	1100000	1080000	1060000	1840000	1850000	1850000	1230000	2090000	1840000	727000	483000	522000	602000
Aspartate	726000	785000	811000	759000	887000	962000	714000	706000	715000	827000	900000	941000	1100000	1230000	1240000	866000	893000	879000	969000	841000	827000	718000	727000	704000	1300000	1290000	1250000	763000	766000	718000	1910000	1830000	1950000	1390000	1340000	1270000	674000	644000	624000	2180000	2140000	2210000	341000	630000	556000	837000	411000	606000	1090000
Glutamate	5720000	5850000	5710000	6120000	5870000	6700000	6120000	6000000	6540000	5930000	6340000	6430000	5820000	6010000	6170000	6540000	6630000	6620000	5600000	5130000	5050000	6670000	6690000	6740000	7590000	7500000	7680000	7240000	7190000	7120000	5480000	5160000	5390000	3170000	3070000	3110000	2640000	2700000	2240000	4640000	4580000	4660000	2770000	4980000	3880000	2860000	1460000	2040000	3750000
Glycine	12200000	12400000	12100000	12700000	11300000	11000000	12800000	12900000	13900000	15500000	16700000	17300000	11000000	11200000	11200000	13500000	13800000	14100000	16300000	14900000	15100000	12600000	12500000	13000000	11100000	11100000	11100000	15200000	15800000	15100000	13400000	12500000	13500000	9400000	9390000	9970000	7160000	6980000	6780000	7560000	7730000	7770000	6720000	11600000	9710000	11000000	6320000	8250000	7500000
Isoleucine	16800000	17200000	16500000	16700000	15800000	15800000	21000000	20800000	22200000	20900000	22300000	23200000	13400000	13200000	13200000	15200000	15500000	16400000	22900000	21100000	21600000	16200000	16100000	16600000	13700000	13700000	13700000	20400000	20600000	20100000	15700000	15000000	17000000	10100000	10000000	9930000	10500000	10400000	10500000	10700000	10700000	10700000	8220000	13900000	11100000	7820000	4290000	6480000	9510000
Leucine	28200000	29200000	28600000	27000000	25600000	26000000	30300000	29700000	31600000	29200000	31200000	32500000	24200000	24100000	23900000	28200000	28800000	30200000	32700000	30300000	31200000	28800000	28400000	29600000	26200000	26800000	26600000	31700000	32000000	30900000	27100000	25200000	28000000	21900000	21900000	22000000	22400000	21900000	22000000	23100000	23300000	23400000	16200000	28400000	23300000	12800000	6760000	10900000	21100000
Lysine	1370000	1630000	1560000	3790000	3720000	3740000	2030000	2110000	2080000	4180000	4520000	4720000	3820000	3940000	3940000	1670000	1720000	2040000	4690000	4250000	4270000	4400000	4350000	4530000	1780000	1900000	1690000	4140000	4170000	4050000	4390000	4130000	4430000	3570000	3560000	3580000	1480000	1470000	1490000	3530000	3470000	3550000	2730000	4790000	3860000	1700000	876000	1220000	1370000
Methionine	2210000	2290000	2240000	2110000	1970000	2070000	2530000	2470000	2630000	2480000	2660000	2780000	1840000	1870000	1860000	2280000	2330000	2400000	2230000	2090000	2100000	2250000	2220000	2250000	2220000	2290000	2310000	2750000	2700000	2630000	2040000	1960000	2210000	1230000	1270000	1370000	1560000	1510000	1510000	1640000	1580000	1650000	1160000	2060000	1670000	1590000	830000	1220000	1490000
Phenylalanine	3680000	3800000	3700000	3440000	3230000	3370000	4240000	4180000	4400000	4140000	4460000	4650000	3060000	3070000	3000000	3860000	3930000	4040000	4670000	4320000	4360000	3720000	3670000	3790000	3530000	3640000	3690000	4430000	4430000	4310000	3360000	3180000	3570000	2540000	2510000	2540000	2460000	2420000	2430000	2740000	2730000	2770000	1860000	3330000	2630000	2790000	1540000	2050000	2500000
Proline	1750000	1780000	1740000	1900000	1640000	1630000	1700000	1640000	1820000	1750000	1870000	1950000	1590000	1560000	1550000	1630000	1670000	1780000	1860000	1710000	1810000	1590000	1600000	1660000	1830000	1880000	1910000	2180000	2190000	2160000	1720000	1550000	1680000	1010000	990000	1020000	755000	735000	748000	694000	704000	704000	595000	1080000	815000	974000	535000	709000	639000
Threonine	4000000	4210000	4140000	5620000	4440000	3890000	4740000	4720000	5060000	5190000	5520000	5770000	4130000	4090000	4070000	4400000	4510000	4850000	3820000	3390000	3400000	4120000	4120000	4310000	4270000	4400000	4420000	5450000	5660000	5220000	5440000	4990000	5770000	3850000	3870000	4040000	3670000	3560000	3540000	3710000	3830000	3760000	2470000	4380000	3570000	2540000	1380000	1990000	3670000
Tryptophan	1060000	1110000	1090000	1000000	946000	960000	1120000	1110000	1160000	1070000	1160000	1210000	879000	896000	892000	925000	945000	1000000	1220000	1140000	1130000	1040000	1040000	1040000	1010000	1030000	1060000	1140000	1130000	1100000	949000	922000	1050000	886000	892000	909000	862000	841000	840000	840000	811000	846000	539000	997000	805000	997000	502000	722000	372000
Tyrosine	5680000	5920000	5760000	4490000	4090000	4280000	6430000	6340000	6680000	6360000	6810000	7110000	4460000	4200000	4130000	5490000	5620000	5850000	7110000	6590000	6650000	4690000	4620000	4760000	1830000	2240000	1680000	6540000	6550000	6310000	4370000	4220000	4890000	3780000	3810000	3860000	3410000	3340000	3390000	4050000	4100000	4080000	2780000	5190000	4060000	3600000	1910000	2590000	1160000
Valine	9150000	9510000	9130000	8520000	8050000	8090000	10500000	10500000	11300000	10500000	11300000	11500000	7360000	7240000	7210000	8880000	9060000	9520000	11700000	10600000	10800000	8900000	8760000	9170000	8140000	8610000	8500000	10700000	10900000	10600000	7970000	7620000	8510000	6410000	6420000	6480000	6730000	6600000	6650000	6900000	6940000	6950000	5050000	8660000	6990000	4900000	2710000	4130000	6510000
Uracil	537000	555000	546000	555000	534000	479000	599000	597000	618000	621000	678000	713000	249000	250000	230000	623000	645000	661000	701000	662000	632000	551000	542000	539000	541000	542000	561000	686000	712000	675000	413000	425000	484000	167000	168000	171000	257000	248000	279000	69000	44700	63100	135000	282000	191000	133000	58900	93500	86300
Succinate	45600000	45400000	45400000	35700000	33400000	35100000	35700000	35100000	36800000	35700000	38500000	40000000	20500000	20700000	20600000	40900000	41300000	42400000	10200000	10700000	11300000	44100000	43900000	44900000	36200000	36300000	39300000	36300000	36300000	35200000	30900000	27900000	30200000	30100000	30700000	32600000	14700000	14500000	15300000	3570000	3380000	3560000	2030000	3590000	2970000	5000000	2750000	3680000	27300000
Lactate	54900000	57700000	58800000	59400000	71300000	83800000	41700000	41300000	45900000	43000000	47000000	46500000	91300000	106000000	103000000	49000000	48200000	43800000	47700000	43600000	44600000	45000000	44400000	46000000	195000000	234000000	222000000	39900000	41000000	40200000	40200000	40100000	38600000	221000000	231000000	259000000	185000000	179000000	180000000	137000000	152000000	142000000	136000000	238000000	192000000	13200000	7300000	9750000	145000000
5-aminovalerate	2350000	2430000	2460000	2470000	2370000	2470000	2590000	2500000	2510000	2290000	2460000	2600000	2060000	2170000	2170000	2300000	2330000	2400000	3190000	3050000	3090000	2250000	2220000	2240000	2300000	2260000	2370000	2730000	2600000	2570000	2360000	2190000	2330000	2800000	2770000	2810000	3210000	3140000	3110000	3070000	2960000	3080000	1630000	2980000	2510000	3880000	2030000	2860000	2780000
Formate	236000	213000	250000	6020000	5240000	8230000	88100	90100	97000	254000	238000	296000	4070000	4660000	4330000	101000	98900	89600	1620000	1530000	1490000	144000	131000	136000	8970000	6460000	7370000	517000	484000	781000	7380000	5110000	1530000	5760000	5820000	5470000	2120000	2000000	2300000	6680000	6510000	6590000	29600	122000	68000	1410000	826000	1270000	5970000
Acetate	131000000	131000000	134000000	93900000	91100000	108000000	133000000	132000000	135000000	97600000	107000000	108000000	91600000	93900000	90300000	189000000	184000000	164000000	126000000	115000000	118000000	180000000	171000000	186000000	103000000	96500000	103000000	116000000	117000000	122000000	137000000	122000000	120000000	357000000	366000000	392000000	367000000	355000000	353000000	312000000	328000000	324000000	180000000	321000000	254000000	284000000	171000000	215000000	353000000
Propionate	1520000	1560000	1580000	1870000	1740000	1860000	2620000	2530000	2740000	2670000	2860000	2920000	1440000	1540000	1520000	2680000	2670000	2460000	7390000	6970000	7000000	3530000	3390000	3590000	2310000	2310000	2400000	3760000	3830000	3790000	1880000	1730000	1880000	1420000	1430000	1420000	3460000	3400000	3370000	3580000	3500000	3630000	7410000	13300000	12000000	7230000	4130000	5390000	2460000
Butyrate	2790000	2810000	2850000	3540000	3470000	3930000	4810000	4680000	4680000	3260000	3480000	3550000	6480000	6870000	7340000	8680000	8610000	8000000	8500000	8380000	8630000	7560000	7110000	7690000	2890000	2680000	2770000	4800000	4610000	5590000	5180000	4660000	4700000	3900000	3770000	3500000	4580000	4510000	4140000	7800000	7670000	7980000	3330000	5910000	5320000	19900000	11400000	14700000	9810000
Valerate	2580000	2720000	2870000	2770000	2740000	2640000	2030000	1910000	1970000	1220000	1290000	1450000	3120000	3070000	3080000	3790000	3610000	3620000	2880000	2690000	3120000	3460000	3470000	3740000	2540000	2530000	2550000	2100000	2000000	2010000	3210000	2800000	3070000	3900000	3720000	3580000	3380000	3340000	3220000	3170000	3270000	3190000	1650000	2760000	2480000	12100000	7080000	8750000	3900000
Isobutyrate	601000	606000	602000	843000	772000	786000	800000	746000	675000	769000	753000	714000	411000	529000	523000	764000	978000	990000	1940000	2070000	1970000	1310000	1100000	1310000	992000	1010000	1000000	1050000	1090000	1020000	677000	548000	538000	688000	700000	676000	1200000	1220000	1220000	1060000	1000000	1080000	1590000	3200000	2800000	5090000	2230000	2870000	1020000
Isovalerate	6010000	6180000	6320000	5960000	5630000	5340000	3980000	3870000	4260000	3580000	3930000	4310000	4570000	4420000	4350000	4680000	4730000	5080000	4450000	4190000	4430000	5240000	5140000	5430000	4240000	4240000	4310000	4860000	4640000	4430000	5060000	4520000	5570000	6110000	5850000	5740000	4900000	4850000	4730000	4050000	3980000	4120000	2050000	4380000	3530000	18700000	9730000	11900000	4390000
Ethanol	207000000	209000000	208000000	96700000	81000000	91300000	82700000	93000000	72600000	69400000	93000000	95000000	111000000	101000000	104000000	134000000	133000000	140000000	142000000	127000000	132000000	213000000	222000000	221000000	220000000	215000000	219000000	103000000	112000000	104000000	110000000	105000000	85000000	208000000	209000000	227000000	135000000	112000000	80800000	77000000	76200000	99300000	50400000	88400000	75400000	140000000	88600000	107000000	165000000
Methanol	3340000	3430000	3580000	4300000	4130000	4130000	3870000	3660000	4110000	3840000	3900000	4210000	3180000	3510000	3200000	3180000	3300000	3050000	2990000	2840000	2990000	3290000	2900000	3420000	2810000	2990000	3060000	5610000	5390000	6510000	3700000	3320000	4170000	3310000	3460000	3480000	3660000	3710000	3970000	4120000	4280000	3860000	2890000	5190000	4410000	4140000	2660000	3140000	2940000
Trimethylamine	3420000	3220000	3200000	1760000	1760000	1790000	1220000	1200000	1240000	1550000	1710000	1750000	2520000	2480000	2470000	4380000	4380000	4260000	2720000	2510000	2590000	2340000	2230000	2390000	3120000	3040000	3140000	6840000	6990000	7130000	2050000	1870000	2040000	2630000	2550000	2400000	2230000	2160000	2080000	1040000	931000	1050000	837000	1520000	1140000	3040000	1750000	2220000	3100000
Glycolate	5580000	5960000	5910000	7490000	6660000	6750000	5900000	5600000	5980000	6540000	6990000	7360000	5550000	5650000	5630000	5690000	5880000	6160000	6510000	6040000	6160000	5550000	5590000	5460000	5930000	5930000	5870000	6980000	6900000	6830000	6400000	5910000	6350000	4640000	4580000	4740000	5060000	4990000	4990000	4220000	4170000	4260000	3160000	5570000	4730000	5430000	2760000	3940000	3250000
Phenylacetate	555000	617000	584000	556000	540000	485000	466000	467000	489000	387000	413000	429000	408000	424000	421000	505000	523000	570000	493000	472000	458000	558000	557000	550000	448000	442000	445000	474000	474000	449000	498000	483000	577000	372000	370000	362000	398000	399000	400000	319000	299000	324000	229000	410000	339000	366000	187000	267000	310000
TZP vs no antibiotics
Peak	D1_TZP_1	D1_TZP_2	D1_TZP_3	D2_TZP_1	D2_TZP_2	D2_TZP_3	D3_TZP_1	D3_TZP_2	D3_TZP_3	D4_TZP_1	D4_TZP_2	D4_TZP_3	D5_TZP_1	D5_TZP_2	D5_TZP_3	D6_TZP_1	D6_TZP_2	D6_TZP_3	D7_TZP_1	D7_TZP_2	D7_TZP_3	D8_TZP_1	D8_TZP_2	D8_TZP_3	D9_TZP_1	D9_TZP_2	D9_TZP_3	D10_TZP_1	D10_TZP_2	D10_TZP_3	D11_TZP_1	D11_TZP_2	D11_TZP_3	D1_No_abx_1	D1_No_abx_2	D1_No_abx_3	D2_No_abx_1	D2_No_abx_2	D2_No_abx_3	D3_No_abx_1	D3_No_abx_2	D3_No_abx_3	D4_No_abx_1	D4_No_abx_2	D4_No_abx_3	D5_No_abx_1	D5_No_abx_2	D5_No_abx_3	D6_No_abx_1
Arabinose	1950000	2000000	1960000	2330000	2420000	2370000	1850000	1710000	1860000	1780000	2040000	2010000	2820000	2800000	2800000	1840000	1700000	1830000	2450000	2480000	2410000	1930000	2100000	1990000	2460000	2700000	2830000	2280000	2410000	2260000	2100000	2130000	2090000	2250000	2230000	2250000	2380000	2280000	2250000	1890000	1790000	1920000	1150000	2390000	1900000	2690000	1180000	1820000	1570000
Fructose	2090000	2110000	2060000	1620000	1680000	1640000	2270000	2120000	2260000	2510000	2820000	2790000	3950000	3820000	3810000	3520000	3420000	3490000	3590000	3710000	3580000	2950000	3640000	3780000	3040000	3320000	3440000	1670000	1710000	1670000	3410000	3970000	3740000	1590000	1590000	1620000	1670000	1620000	1610000	1550000	1510000	1570000	856000	1650000	1320000	1890000	962000	1360000	1460000
Fucose	2600000	2600000	2530000	1570000	1550000	1440000	2210000	2100000	2130000	2090000	2370000	2390000	2390000	2290000	2290000	2290000	2150000	2280000	2690000	2790000	2710000	2350000	2450000	2320000	2340000	2560000	2650000	1770000	1840000	1770000	2330000	2340000	2320000	2710000	2740000	2830000	2320000	2260000	2240000	1640000	1650000	1690000	1280000	2280000	1910000	2050000	1040000	1530000	1760000
Galactose	1900000	1860000	1780000	1330000	1240000	1000000	2490000	2360000	2490000	1790000	1990000	1870000	1850000	1800000	1780000	2730000	2590000	2680000	1490000	1490000	1450000	1500000	1830000	1880000	1350000	1480000	1530000	2040000	2120000	2050000	2070000	2020000	2060000	522000	527000	534000	661000	677000	700000	474000	386000	461000	201000	393000	338000	503000	241000	380000	390000
Glucose	28200000	28800000	27400000	5590000	2190000	1620000	24200000	23400000	23400000	30000000	32700000	33000000	28800000	29000000	28300000	19700000	18900000	19600000	21400000	22200000	21100000	14300000	14600000	14300000	23300000	26400000	26200000	24200000	26000000	24400000	23600000	22400000	22700000	999000	1120000	1390000	1240000	1280000	1280000	610000	583000	625000	580000	1180000	894000	810000	365000	584000	367000
Mannose	666000	658000	637000	256000	267000	220000	502000	478000	539000	680000	747000	680000	663000	653000	651000	637000	624000	620000	490000	473000	494000	510000	543000	529000	553000	615000	617000	284000	276000	269000	646000	641000	638000	488000	484000	530000	447000	457000	471000	308000	270000	306000	130000	272000	226000	376000	178000	289000	240000
Ribose	1360000	1410000	1370000	1180000	1050000	499000	1870000	1630000	2260000	1970000	1990000	1720000	1170000	1440000	1170000	1750000	1890000	1660000	1550000	1490000	1640000	1970000	1580000	1440000	1330000	1460000	1480000	758000	611000	735000	1950000	1790000	1930000	996000	1010000	1130000	829000	1190000	1280000	803000	595000	741000	427000	636000	772000	916000	599000	1060000	633000
Xylose	3700000	3560000	3510000	1340000	1400000	1040000	3700000	3660000	3760000	1940000	2200000	2120000	1890000	1680000	1730000	4340000	3940000	4320000	834000	820000	820000	3050000	3380000	3540000	2090000	2350000	2370000	6070000	6170000	5950000	3260000	3010000	3110000	1000000	973000	1000000	880000	819000	765000	1040000	1060000	1060000	321000	646000	514000	1180000	567000	827000	930000
N-acetylglucosamine	983000	1020000	956000	327000	322000	234000	754000	715000	733000	703000	786000	778000	1170000	1140000	1120000	610000	611000	548000	1680000	1700000	1610000	834000	853000	840000	883000	1000000	1010000	342000	337000	355000	489000	570000	638000	559000	609000	575000	515000	513000	557000	223000	169000	213000	187000	364000	304000	527000	260000	395000	210000
Maltose	323000	382000	369000	325000	259000	217000	347000	232000	320000	612000	616000	585000	1170000	1300000	1240000	328000	316000	310000	414000	450000	448000	328000	317000	213000	688000	704000	786000	152000	171000	162000	1100000	1060000	1040000	630000	749000	1050000	757000	828000	853000	357000	309000	356000	554000	1050000	793000	246000	88800	182000	86000
Sucrose	123000	132000	128000	125000	117000	75300	140000	88200	135000	170000	168000	130000	236000	284000	285000	134000	133000	123000	159000	162000	159000	142000	132000	91600	290000	237000	312000	79100	90700	82700	761000	794000	666000	127000	131000	149000	129000	133000	138000	119000	90400	118000	83700	161000	130000	132000	53500	101000	61300
Trehalose	505000	496000	484000	323000	350000	282000	436000	440000	450000	353000	382000	393000	559000	518000	509000	374000	379000	380000	448000	428000	452000	482000	515000	476000	426000	475000	478000	428000	471000	447000	696000	698000	656000	535000	537000	577000	318000	326000	312000	490000	501000	494000	145000	280000	237000	558000	272000	392000	427000
Alanine	12900000	12300000	12400000	12000000	12300000	11700000	13300000	13800000	13900000	13400000	15000000	15000000	10900000	10500000	10300000	13000000	12200000	12800000	16300000	16300000	16100000	13300000	13600000	14000000	11900000	13900000	13500000	14900000	15300000	14700000	11300000	11000000	11200000	9320000	9280000	9420000	8800000	8580000	8600000	9060000	9130000	9140000	7790000	13600000	11000000	11200000	6620000	8810000	10100000
Arginine	3520000	3430000	3030000	1520000	1420000	1330000	3430000	3770000	3620000	2110000	2370000	2650000	2170000	2070000	2060000	2600000	2280000	2550000	2230000	2340000	2630000	2030000	2130000	2100000	2000000	2220000	2140000	2750000	2950000	2620000	2880000	2760000	2840000	1420000	1410000	1440000	1100000	1080000	1060000	1840000	1850000	1850000	1230000	2090000	1840000	727000	483000	522000	602000
Aspartate	695000	713000	695000	544000	567000	544000	584000	607000	625000	447000	515000	524000	698000	704000	701000	756000	681000	711000	738000	713000	715000	644000	650000	657000	583000	726000	693000	555000	588000	588000	1200000	1290000	1250000	1390000	1340000	1270000	674000	644000	624000	2180000	2140000	2210000	341000	630000	556000	837000	411000	606000	1090000
Glutamate	6760000	6410000	6180000	5760000	6040000	5210000	7670000	7930000	7950000	7320000	8200000	8260000	5200000	5040000	5010000	6720000	6310000	6640000	7130000	6660000	6960000	7120000	7060000	7240000	5860000	6640000	6680000	8480000	8710000	8410000	5810000	5520000	5620000	3170000	3070000	3110000	2640000	2700000	2240000	4640000	4580000	4660000	2770000	4980000	3880000	2860000	1460000	2040000	3750000
Glycine	12500000	12000000	12400000	5720000	4940000	5100000	13700000	13800000	14000000	15800000	17800000	17900000	12100000	11900000	11800000	13100000	12300000	13000000	14000000	13700000	13500000	12700000	13300000	13600000	10600000	12300000	12200000	10400000	11300000	10700000	12500000	12900000	12900000	9400000	9390000	9970000	7160000	6980000	6780000	7560000	7730000	7770000	6720000	11600000	9710000	11000000	6320000	8250000	7500000
Isoleucine	17200000	16400000	15700000	15100000	15600000	15000000	20800000	21900000	21400000	20300000	22800000	23100000	14700000	14400000	14100000	14700000	13800000	14400000	18400000	18500000	18400000	15700000	16400000	17200000	14700000	16600000	16600000	18600000	19400000	18800000	16500000	16100000	16500000	10100000	10000000	9930000	10500000	10400000	10500000	10700000	10700000	10700000	8220000	13900000	11100000	7820000	4290000	6480000	9510000
Leucine	28900000	28000000	27100000	24600000	25500000	24800000	29900000	31300000	30800000	27900000	31300000	32000000	24900000	24300000	23700000	27300000	25500000	26800000	28100000	28600000	28000000	27600000	28300000	29400000	25000000	29000000	28500000	29900000	31000000	29800000	27600000	26900000	27400000	21900000	21900000	22000000	22400000	21900000	22000000	23100000	23300000	23400000	16200000	28400000	23300000	12800000	6760000	10900000	21100000
Lysine	1360000	1330000	1360000	1170000	1210000	1330000	1530000	1720000	1720000	1620000	1810000	1730000	3840000	3940000	3820000	1560000	1350000	1450000	2140000	2080000	2170000	1510000	1620000	1670000	1490000	1930000	1740000	2810000	3000000	2850000	4500000	4320000	4380000	3570000	3560000	3580000	1480000	1470000	1490000	3530000	3470000	3550000	2730000	4790000	3860000	1700000	876000	1220000	1370000
Methionine	2280000	2180000	2120000	1890000	1930000	1820000	2480000	2540000	2550000	2320000	2620000	2670000	1940000	1880000	1840000	2170000	2040000	2130000	2360000	2370000	2340000	2080000	2170000	2250000	2060000	2440000	2360000	2400000	2430000	2330000	2170000	2080000	2160000	1230000	1270000	1370000	1560000	1510000	1510000	1640000	1580000	1650000	1160000	2060000	1670000	1590000	830000	1220000	1490000
Phenylalanine	3860000	3680000	3610000	3140000	3260000	3160000	4220000	4430000	4400000	3940000	4430000	4490000	3150000	3050000	2920000	3810000	3560000	3670000	4370000	4370000	4320000	3550000	3690000	3890000	3280000	3940000	3760000	4240000	4400000	4200000	3680000	3560000	3710000	2540000	2510000	2540000	2460000	2420000	2430000	2740000	2730000	2770000	1860000	3330000	2630000	2790000	1540000	2050000	2500000
Proline	1830000	1760000	1680000	1410000	1490000	1380000	1720000	1810000	1780000	1770000	2010000	2130000	1560000	1510000	1480000	1580000	1470000	1540000	1400000	1440000	1420000	1480000	1550000	1640000	1680000	1910000	1920000	2100000	2180000	2050000	1650000	1590000	1600000	1010000	990000	1020000	755000	735000	748000	694000	704000	704000	595000	1080000	815000	974000	535000	709000	639000
Threonine	4110000	3990000	3960000	3810000	3810000	3770000	4480000	4710000	4590000	5050000	5510000	5530000	5310000	4730000	4590000	4000000	3780000	3970000	4550000	4550000	4530000	3820000	3960000	4120000	4790000	5410000	5370000	5090000	5310000	5170000	5220000	5130000	5000000	3850000	3870000	4040000	3670000	3560000	3540000	3710000	3830000	3760000	2470000	4380000	3570000	2540000	1380000	1990000	3670000
Tryptophan	1100000	1080000	1060000	903000	939000	853000	1070000	1090000	1100000	1010000	1120000	1110000	949000	931000	902000	885000	824000	841000	1180000	1180000	1160000	960000	989000	983000	954000	1110000	1090000	1010000	1050000	1000000	981000	961000	993000	886000	892000	909000	862000	841000	840000	840000	811000	846000	539000	997000	805000	997000	502000	722000	372000
Tyrosine	5920000	5600000	5550000	3890000	3950000	3810000	5980000	6490000	6450000	6040000	6770000	6810000	4350000	4190000	3910000	5190000	4690000	4840000	6210000	6150000	6130000	4290000	4470000	4790000	4540000	5740000	5240000	5800000	6090000	5830000	4980000	4670000	5060000	3780000	3810000	3860000	3410000	3340000	3390000	4050000	4100000	4080000	2780000	5190000	4060000	3600000	1910000	2590000	1160000
Valine	9450000	8890000	8780000	8050000	8360000	8050000	10400000	11200000	11000000	10400000	11500000	11500000	7700000	7480000	7310000	8640000	7970000	8400000	9200000	9210000	9090000	8790000	9020000	9380000	7860000	9260000	8970000	10300000	10800000	10500000	8550000	8280000	8520000	6410000	6420000	6480000	6730000	6600000	6650000	6900000	6940000	6950000	5050000	8660000	6990000	4900000	2710000	4130000	6510000
Uracil	485000	488000	507000	377000	379000	320000	617000	584000	609000	588000	662000	643000	370000	358000	333000	585000	546000	566000	323000	323000	308000	473000	510000	555000	608000	700000	693000	543000	568000	538000	582000	592000	597000	167000	168000	171000	257000	248000	279000	69000	44700	63100	135000	282000	191000	133000	58900	93500	86300
Succinate	52100000	49700000	48700000	4730000	5210000	6650000	3820000	3770000	3800000	36200000	40200000	37900000	29600000	27600000	28100000	42300000	40900000	42300000	25700000	26800000	25800000	20000000	21700000	22500000	26300000	27700000	26500000	23200000	23500000	22200000	40900000	37000000	37000000	30100000	30700000	32600000	14700000	14500000	15300000	3570000	3380000	3560000	2030000	3590000	2970000	5000000	2750000	3680000	27300000
Lactate	60200000	57300000	55800000	27200000	28500000	29100000	41300000	45400000	44200000	39100000	43500000	44400000	29000000	27600000	27700000	45800000	44300000	46000000	87500000	88100000	90000000	51000000	43700000	44000000	21600000	24600000	24300000	39100000	40000000	38600000	32800000	31500000	32100000	221000000	231000000	259000000	185000000	179000000	180000000	137000000	152000000	142000000	136000000	238000000	192000000	13200000	7300000	9750000	145000000
5-aminovalerate	2350000	2410000	2310000	2210000	2280000	2180000	2680000	2590000	2700000	1990000	2280000	2330000	2380000	2380000	2360000	2380000	2260000	2410000	3220000	3320000	3230000	2310000	2370000	2340000	1820000	1950000	2080000	2460000	2470000	2270000	2260000	2260000	2250000	2800000	2770000	2810000	3210000	3140000	3110000	3070000	2960000	3080000	1630000	2980000	2510000	3880000	2030000	2860000	2780000
Formate	211000	222000	325000	824000	1330000	1500000	283000	395000	300000	934000	1080000	1230000	91900	91500	85000	102000	88000	90100	54900	49000	48800	89800	119000	119000	61300	79400	62800	116000	194000	187000	473000	627000	616000	5760000	5820000	5470000	2120000	2000000	2300000	6680000	6510000	6590000	29600	122000	68000	1410000	826000	1270000	5970000
Acetate	148000000	140000000	137000000	184000000	197000000	188000000	147000000	150000000	150000000	97100000	108000000	111000000	66800000	62200000	62900000	196000000	180000000	195000000	110000000	113000000	112000000	184000000	187000000	191000000	81100000	90400000	91600000	229000000	219000000	209000000	137000000	127000000	127000000	357000000	366000000	392000000	367000000	355000000	353000000	312000000	328000000	324000000	180000000	321000000	254000000	284000000	171000000	215000000	353000000
Propionate	1600000	1570000	1500000	3530000	3660000	3050000	4570000	4500000	4560000	2710000	3040000	3220000	1720000	1640000	1650000	2740000	2540000	2740000	9370000	9450000	9340000	6290000	5440000	5270000	2980000	3380000	3620000	4790000	4780000	4480000	1960000	1910000	1930000	1420000	1430000	1420000	3460000	3400000	3370000	3580000	3500000	3630000	7410000	13300000	12000000	7230000	4130000	5390000	2460000
Butyrate	3120000	3100000	2930000	3300000	3430000	2530000	9470000	10600000	10300000	4630000	5210000	5250000	2960000	2870000	2930000	12100000	10800000	12200000	2780000	2930000	2830000	8980000	9150000	9150000	2420000	2520000	2710000	5840000	5820000	5480000	7510000	7170000	7330000	3900000	3770000	3500000	4580000	4510000	4140000	7800000	7670000	7980000	3330000	5910000	5320000	19900000	11400000	14700000	9810000
Valerate	2640000	2840000	2670000	2460000	2580000	2580000	2520000	2850000	2440000	1150000	1360000	1650000	3270000	3370000	3330000	3840000	3610000	4060000	2360000	2550000	2520000	3790000	3920000	4050000	2480000	2640000	2840000	2140000	2190000	2020000	3040000	3150000	2980000	3900000	3720000	3580000	3380000	3340000	3220000	3170000	3270000	3190000	1650000	2760000	2480000	12100000	7080000	8750000	3900000
Isobutyrate	485000	589000	540000	984000	865000	864000	1170000	1460000	1150000	636000	706000	678000	434000	545000	529000	1040000	926000	929000	2480000	2630000	2300000	1840000	1610000	1680000	1040000	1130000	1220000	1120000	1080000	1080000	583000	577000	592000	688000	700000	676000	1200000	1220000	1220000	1060000	1000000	1080000	1590000	3200000	2800000	5090000	2230000	2870000	1020000
Isovalerate	6080000	6180000	5910000	5140000	5480000	5150000	4190000	4150000	3990000	3140000	3720000	3960000	5970000	5780000	5680000	4720000	4530000	4800000	4990000	5230000	5270000	5670000	5770000	5780000	4560000	4910000	5180000	4110000	4200000	3940000	4940000	5050000	4930000	6110000	5850000	5740000	4900000	4850000	4730000	4050000	3980000	4120000	2050000	4380000	3530000	18700000	9730000	11900000	4390000
Ethanol	215000000	198000000	214000000	141000000	99500000	105000000	81800000	71800000	75400000	83000000	85700000	68400000	102000000	92800000	91600000	140000000	124000000	134000000	139000000	144000000	137000000	210000000	228000000	214000000	191000000	212000000	218000000	136000000	139000000	130000000	108000000	106000000	102000000	208000000	209000000	227000000	135000000	112000000	80800000	77000000	76200000	99300000	50400000	88400000	75400000	140000000	88600000	107000000	165000000
Methanol	3230000	3370000	3420000	4040000	4550000	4300000	4620000	4870000	4700000	3580000	4170000	4710000	3340000	3510000	3530000	3890000	3410000	4040000	2800000	2900000	2890000	3350000	3300000	3520000	2820000	3070000	3130000	7480000	7690000	7200000	4020000	4120000	4090000	3310000	3460000	3480000	3660000	3710000	3970000	4120000	4280000	3860000	2890000	5190000	4410000	4140000	2660000	3140000	2940000
Trimethylamine	3440000	3150000	2930000	1570000	1710000	1550000	1250000	1290000	1270000	1430000	1610000	1560000	2540000	2460000	2460000	4000000	3750000	4110000	1800000	1900000	1830000	2670000	2710000	2850000	2100000	2300000	2340000	6900000	6930000	6600000	2070000	1950000	1910000	2630000	2550000	2400000	2230000	2160000	2080000	1040000	931000	1050000	837000	1520000	1140000	3040000	1750000	2220000	3100000
Glycolate	5740000	5740000	5570000	5740000	6210000	5860000	5370000	5480000	5700000	5690000	6340000	6310000	6060000	6060000	6000000	5130000	4920000	4990000	7360000	7340000	7050000	4880000	5180000	5420000	5530000	6230000	6380000	6550000	6790000	6400000	6020000	5780000	5920000	4640000	4580000	4740000	5060000	4990000	4990000	4220000	4170000	4260000	3160000	5570000	4730000	5430000	2760000	3940000	3250000
Phenylacetate	547000	542000	537000	517000	515000	468000	444000	448000	443000	341000	385000	387000	419000	440000	444000	468000	445000	458000	423000	438000	429000	513000	516000	561000	424000	446000	490000	378000	396000	393000	515000	516000	514000	372000	370000	362000	398000	399000	400000	319000	299000	324000	229000	410000	339000	366000	187000	267000	310000
CIP vs no antibiotics
Peak	D1_CIP_1	D1_CIP_2	D1_CIP_3	D2_CIP_1	D2_CIP_2	D2_CIP_3	D3_CIP_1	D3_CIP_2	D3_CIP_3	D4_CIP_1	D4_CIP_2	D4_CIP_3	D5_CIP_1	D5_CIP_2	D5_CIP_3	D6_CIP_1	D6_CIP_2	D6_CIP_3	D7_CIP_1	D7_CIP_2	D7_CIP_3	D8_CIP_1	D8_CIP_2	D8_CIP_3	D9_CIP_1	D9_CIP_2	D9_CIP_3	D10_CIP_1	D10_CIP_2	D10_CIP_3	D11_CIP_1	D11_CIP_2	D11_CIP_3	D1_No_abx_1	D1_No_abx_2	D1_No_abx_3	D2_No_abx_1	D2_No_abx_2	D2_No_abx_3	D3_No_abx_1	D3_No_abx_2	D3_No_abx_3	D4_No_abx_1	D4_No_abx_2	D4_No_abx_3	D5_No_abx_1	D5_No_abx_2	D5_No_abx_3	D6_No_abx_1
Arabinose	1830000	1630000	1670000	2020000	2110000	1880000	1410000	1810000	1200000	1390000	1780000	1520000	2660000	2520000	2690000	1370000	1440000	1450000	1540000	1530000	1560000	1810000	1760000	1780000	2200000	1820000	1650000	1590000	1500000	1730000	1930000	2010000	1850000	2250000	2230000	2250000	2380000	2280000	2250000	1890000	1790000	1920000	1150000	2390000	1900000	2690000	1180000	1820000	1570000
Fructose	1500000	1400000	1450000	1910000	1990000	1800000	1470000	1820000	1190000	2090000	2520000	2230000	3940000	3820000	4020000	1440000	1420000	1490000	2470000	2420000	2500000	1770000	1640000	1760000	3010000	2830000	2570000	3200000	3120000	3430000	4570000	4690000	4440000	1590000	1590000	1620000	1670000	1620000	1610000	1550000	1510000	1570000	856000	1650000	1320000	1890000	962000	1360000	1460000
Fucose	2300000	2210000	2270000	1850000	2010000	1700000	1380000	1700000	1290000	1660000	1880000	1790000	2440000	2360000	2550000	1720000	1750000	1760000	1590000	1590000	1580000	1820000	1680000	1760000	2100000	1980000	1790000	1700000	1630000	1810000	1810000	1870000	1740000	2710000	2740000	2830000	2320000	2260000	2240000	1640000	1650000	1690000	1280000	2280000	1910000	2050000	1040000	1530000	1760000
Galactose	1100000	1540000	1580000	965000	988000	697000	775000	942000	556000	967000	1210000	1020000	1610000	1580000	1630000	965000	896000	962000	752000	650000	703000	377000	365000	386000	850000	392000	391000	1450000	1350000	1600000	1380000	1400000	1240000	522000	527000	534000	661000	677000	700000	474000	386000	461000	201000	393000	338000	503000	241000	380000	390000
Glucose	17900000	23200000	23800000	19700000	20600000	22600000	9620000	10700000	8030000	22200000	25500000	23600000	28200000	26000000	27600000	6050000	5570000	7000000	5890000	4620000	5570000	517000	502000	573000	15500000	12100000	11900000	28300000	27200000	29400000	18100000	18500000	17600000	999000	1120000	1390000	1240000	1280000	1280000	610000	583000	625000	580000	1180000	894000	810000	365000	584000	367000
Mannose	516000	480000	487000	582000	612000	562000	346000	456000	347000	513000	691000	537000	721000	687000	735000	414000	387000	418000	244000	239000	227000	267000	260000	265000	582000	525000	487000	514000	477000	546000	608000	632000	568000	488000	484000	530000	447000	457000	471000	308000	270000	306000	130000	272000	226000	376000	178000	289000	240000
Ribose	1540000	1440000	1540000	1430000	1720000	1160000	1090000	1440000	1270000	1090000	1780000	1070000	1200000	1060000	1270000	1480000	958000	1170000	1370000	1370000	1240000	1290000	1190000	1350000	1010000	1240000	1180000	1480000	1400000	1630000	1370000	1530000	1080000	996000	1010000	1130000	829000	1190000	1280000	803000	595000	741000	427000	636000	772000	916000	599000	1060000	633000
Xylose	3090000	3120000	3180000	779000	876000	794000	2480000	2920000	2430000	996000	1160000	1090000	1500000	1600000	1590000	2040000	2010000	2120000	557000	537000	536000	959000	952000	1050000	1800000	1100000	1060000	3680000	3410000	3840000	1890000	1930000	1900000	1000000	973000	1000000	880000	819000	765000	1040000	1060000	1060000	321000	646000	514000	1180000	567000	827000	930000
N-acetylglucosamine	1090000	1010000	1030000	922000	928000	854000	532000	672000	505000	432000	673000	455000	1030000	1040000	1070000	282000	243000	276000	843000	734000	832000	294000	289000	304000	756000	684000	636000	836000	773000	880000	439000	459000	364000	559000	609000	575000	515000	513000	557000	223000	169000	213000	187000	364000	304000	527000	260000	395000	210000
Maltose	554000	436000	456000	1190000	1120000	1110000	371000	513000	316000	709000	884000	731000	1450000	1180000	1350000	136000	118000	131000	204000	192000	197000	199000	201000	208000	324000	348000	359000	271000	263000	370000	1470000	1630000	1380000	630000	749000	1050000	757000	828000	853000	357000	309000	356000	554000	1050000	793000	246000	88800	182000	86000
Sucrose	118000	95700	97200	200000	197000	136000	88400	141000	72900	115000	193000	120000	338000	273000	302000	58900	51200	57400	71400	72800	69700	89900	89500	91400	78300	80000	74900	110000	158000	186000	636000	974000	566000	127000	131000	149000	129000	133000	138000	119000	90400	118000	83700	161000	130000	132000	53500	101000	61300
Trehalose	567000	519000	530000	382000	395000	383000	421000	530000	445000	358000	406000	362000	513000	489000	529000	420000	414000	417000	439000	470000	451000	419000	420000	441000	400000	362000	344000	735000	720000	732000	630000	677000	628000	535000	537000	577000	318000	326000	312000	490000	501000	494000	145000	280000	237000	558000	272000	392000	427000
Alanine	12000000	12000000	12300000	10100000	11000000	11300000	10400000	12400000	10200000	12800000	13700000	13500000	10300000	10100000	10600000	12800000	13200000	13400000	14700000	14600000	14600000	14000000	13400000	13700000	12200000	12200000	11100000	14200000	13100000	15100000	12000000	12100000	12200000	9320000	9280000	9420000	8800000	8580000	8600000	9060000	9130000	9140000	7790000	13600000	11000000	11200000	6620000	8810000	10100000
Arginine	2720000	3060000	3120000	3340000	3500000	3800000	2300000	2660000	2420000	3010000	3080000	3120000	2330000	2110000	2270000	1020000	967000	1050000	1000000	981000	1010000	557000	661000	722000	2500000	2470000	2460000	3330000	3250000	3330000	3020000	3170000	3170000	1420000	1410000	1440000	1100000	1080000	1060000	1840000	1850000	1850000	1230000	2090000	1840000	727000	483000	522000	602000
Aspartate	1130000	1010000	1050000	878000	1870000	1820000	1860000	2230000	1680000	1120000	1290000	1190000	2110000	1970000	2120000	1550000	1510000	1570000	508000	507000	618000	820000	842000	866000	2540000	2540000	2310000	1670000	1460000	1780000	1510000	1570000	1460000	1390000	1340000	1270000	674000	644000	624000	2180000	2140000	2210000	341000	630000	556000	837000	411000	606000	1090000
Glutamate	4500000	3540000	3700000	5590000	5950000	6060000	5430000	6630000	5210000	5980000	6420000	6480000	4650000	4500000	4770000	5900000	5930000	6220000	7400000	7230000	7290000	6380000	6070000	6350000	6380000	6860000	6170000	5730000	5340000	6060000	5600000	5970000	5870000	3170000	3070000	3110000	2640000	2700000	2240000	4640000	4580000	4660000	2770000	4980000	3880000	2860000	1460000	2040000	3750000
Glycine	7180000	6260000	6240000	8340000	7890000	6910000	9890000	11900000	10100000	13200000	14300000	13900000	11300000	10900000	11500000	9660000	9830000	10100000	13000000	12800000	12800000	7500000	7200000	7800000	11300000	12000000	10800000	7950000	7910000	9750000	12900000	13200000	12900000	9400000	9390000	9970000	7160000	6980000	6780000	7560000	7730000	7770000	6720000	11600000	9710000	11000000	6320000	8250000	7500000
Isoleucine	14400000	14400000	14800000	13100000	13600000	13600000	13500000	15900000	13300000	18600000	20000000	19700000	13300000	12900000	13500000	12400000	12500000	12900000	16300000	16200000	16000000	13600000	13000000	13300000	14800000	14400000	13100000	16600000	15500000	17300000	15100000	15500000	15400000	10100000	10000000	9930000	10500000	10400000	10500000	10700000	10700000	10700000	8220000	13900000	11100000	7820000	4290000	6480000	9510000
Leucine	28100000	27700000	28300000	24000000	25500000	25600000	25100000	29800000	23700000	29000000	31000000	30900000	24200000	23300000	24700000	24700000	24900000	25500000	28300000	28300000	28300000	26300000	25000000	25800000	27800000	27800000	25300000	29500000	27300000	31100000	26600000	27100000	27000000	21900000	21900000	22000000	22400000	21900000	22000000	23100000	23300000	23400000	16200000	28400000	23300000	12800000	6760000	10900000	21100000
Lysine	4120000	4280000	4320000	4140000	4360000	4400000	3940000	4700000	3720000	5370000	5870000	5650000	4300000	4140000	4380000	3280000	2750000	3350000	2260000	2930000	2590000	2170000	2150000	2220000	4800000	4670000	4300000	3890000	3580000	4150000	4560000	4720000	4640000	3570000	3560000	3580000	1480000	1470000	1490000	3530000	3470000	3550000	2730000	4790000	3860000	1700000	876000	1220000	1370000
Methionine	2170000	2140000	2170000	1850000	2020000	2010000	1940000	2360000	1820000	2430000	2610000	2600000	1880000	1820000	1920000	1960000	2000000	2050000	2220000	2240000	2240000	1970000	1880000	1930000	2220000	2160000	1960000	2530000	2280000	2630000	2100000	2120000	2090000	1230000	1270000	1370000	1560000	1510000	1510000	1640000	1580000	1650000	1160000	2060000	1670000	1590000	830000	1220000	1490000
Phenylalanine	3700000	3610000	3700000	3130000	3290000	3300000	3290000	3920000	3140000	4100000	4410000	4350000	2860000	2810000	2940000	3300000	3320000	3320000	4120000	4070000	4100000	3270000	3110000	3160000	3630000	3600000	3280000	4020000	3660000	4300000	3540000	3470000	3480000	2540000	2510000	2540000	2460000	2420000	2430000	2740000	2730000	2770000	1860000	3330000	2630000	2790000	1540000	2050000	2500000
Proline	817000	888000	986000	1550000	1560000	1610000	1070000	1250000	1140000	1690000	1760000	1830000	1390000	1340000	1430000	833000	831000	863000	1630000	1610000	1610000	1220000	1170000	1210000	1690000	1630000	1490000	1550000	1470000	1580000	1710000	1740000	1780000	1010000	990000	1020000	755000	735000	748000	694000	704000	704000	595000	1080000	815000	974000	535000	709000	639000
Threonine	3700000	3830000	3890000	4020000	4280000	4170000	3760000	4400000	3540000	4720000	5200000	4990000	5910000	5550000	6020000	3740000	3770000	3850000	4220000	4250000	4190000	3570000	3450000	3560000	4710000	4450000	4020000	4710000	4500000	5010000	5080000	5540000	5090000	3850000	3870000	4040000	3670000	3560000	3540000	3710000	3830000	3760000	2470000	4380000	3570000	2540000	1380000	1990000	3670000
Tryptophan	1040000	996000	1010000	920000	981000	935000	816000	1020000	783000	1000000	1110000	1060000	931000	902000	950000	508000	488000	515000	1020000	1010000	1040000	923000	886000	909000	1060000	1060000	964000	812000	700000	893000	953000	964000	921000	886000	892000	909000	862000	841000	840000	840000	811000	846000	539000	997000	805000	997000	502000	722000	372000
Tyrosine	6000000	5800000	5830000	4040000	4380000	4510000	4570000	5480000	4390000	5980000	6400000	6340000	3930000	3880000	4030000	4390000	4320000	4430000	5970000	5910000	5910000	4300000	4040000	4150000	5100000	4860000	4460000	5550000	4820000	5950000	4720000	4520000	4560000	3780000	3810000	3860000	3410000	3340000	3390000	4050000	4100000	4080000	2780000	5190000	4060000	3600000	1910000	2590000	1160000
Valine	9440000	9300000	9470000	7540000	8070000	8170000	8420000	10100000	8270000	9880000	10500000	10400000	7270000	7090000	7460000	8400000	8510000	8770000	10400000	10400000	10300000	8930000	8490000	8720000	8770000	8900000	8050000	9720000	8910000	10400000	8530000	8640000	8650000	6410000	6420000	6480000	6730000	6600000	6650000	6900000	6940000	6950000	5050000	8660000	6990000	4900000	2710000	4130000	6510000
Uracil	411000	384000	396000	491000	495000	491000	281000	329000	286000	480000	548000	513000	318000	314000	324000	247000	237000	236000	532000	477000	478000	171000	148000	153000	519000	484000	449000	533000	505000	598000	437000	390000	389000	167000	168000	171000	257000	248000	279000	69000	44700	63100	135000	282000	191000	133000	58900	93500	86300
Succinate	43300000	48200000	50600000	104000000	91500000	90200000	3520000	4310000	3680000	5080000	4450000	5360000	6760000	5900000	7090000	25000000	23600000	24500000	4160000	4280000	4200000	9640000	11900000	11400000	32100000	57900000	50100000	24000000	22500000	23400000	83200000	85800000	86600000	30100000	30700000	32600000	14700000	14500000	15300000	3570000	3380000	3560000	2030000	3590000	2970000	5000000	2750000	3680000	27300000
Lactate	28500000	36500000	37200000	22600000	20600000	25200000	14900000	17800000	14100000	57700000	58900000	64700000	21700000	21100000	22500000	74700000	79200000	69000000	18900000	18600000	18500000	57000000	62100000	60800000	22700000	23400000	21300000	30500000	28800000	32500000	18400000	18700000	18300000	221000000	231000000	259000000	185000000	179000000	180000000	137000000	152000000	142000000	136000000	238000000	192000000	13200000	7300000	9750000	145000000
5-aminovalerate	5010000	4800000	4690000	2210000	2470000	2390000	2920000	3580000	2440000	2690000	2960000	2930000	2370000	2230000	2400000	3170000	3240000	3270000	3960000	4090000	4000000	2550000	2430000	2500000	1770000	1760000	1590000	3770000	3640000	3890000	2490000	2600000	2530000	2800000	2770000	2810000	3210000	3140000	3110000	3070000	2960000	3080000	1630000	2980000	2510000	3880000	2030000	2860000	2780000
Formate	5060000	4000000	3760000	426000	355000	62500	143000	129000	91400	3070000	3130000	3190000	89800	97000	66600	82900	80800	71500	606000	611000	671000	1070000	1290000	1210000	72500	76900	79000	179000	183000	233000	740000	674000	560000	5760000	5820000	5470000	2120000	2000000	2300000	6680000	6510000	6590000	29600	122000	68000	1410000	826000	1270000	5970000
Acetate	173000000	154000000	155000000	115000000	115000000	126000000	159000000	190000000	144000000	134000000	137000000	143000000	57800000	58400000	61800000	247000000	253000000	251000000	232000000	237000000	231000000	307000000	285000000	285000000	144000000	218000000	195000000	175000000	168000000	179000000	135000000	137000000	141000000	357000000	366000000	392000000	367000000	355000000	353000000	312000000	328000000	324000000	180000000	321000000	254000000	284000000	171000000	215000000	353000000
Propionate	1860000	1800000	1850000	2810000	3210000	3110000	4370000	5370000	4170000	6170000	6410000	6630000	1790000	1810000	1870000	4670000	4770000	4930000	19700000	20300000	19900000	6640000	6140000	6330000	2780000	3000000	2700000	5610000	5510000	5920000	3310000	3390000	3480000	1420000	1430000	1420000	3460000	3400000	3370000	3580000	3500000	3630000	7410000	13300000	12000000	7230000	4130000	5390000	2460000
Butyrate	9100000	5290000	5670000	2870000	3610000	4090000	16000000	19500000	15700000	3260000	3420000	3560000	2460000	2460000	2610000	11600000	11700000	11900000	3910000	4000000	3900000	10400000	9390000	9490000	1900000	2050000	1820000	4120000	4060000	4180000	4570000	4960000	5020000	3900000	3770000	3500000	4580000	4510000	4140000	7800000	7670000	7980000	3330000	5910000	5320000	19900000	11400000	14700000	9810000
Valerate	3580000	3350000	3460000	2720000	3100000	3150000	3590000	3980000	3800000	1630000	1690000	1760000	3680000	3420000	3720000	4220000	4260000	4240000	3040000	3170000	2980000	4700000	4390000	4500000	3060000	3100000	2800000	2770000	2800000	2610000	2790000	2980000	3040000	3900000	3720000	3580000	3380000	3340000	3220000	3170000	3270000	3190000	1650000	2760000	2480000	12100000	7080000	8750000	3900000
Isobutyrate	575000	628000	653000	922000	1070000	1010000	1080000	1370000	814000	1380000	1470000	1660000	600000	616000	626000	1740000	1720000	1830000	5180000	4470000	4930000	2490000	2160000	2320000	1020000	1130000	939000	1430000	1390000	1580000	957000	973000	1010000	688000	700000	676000	1200000	1220000	1220000	1060000	1000000	1080000	1590000	3200000	2800000	5090000	2230000	2870000	1020000
Isovalerate	5820000	5970000	6050000	5330000	5970000	5580000	3850000	4810000	3440000	3770000	4220000	3970000	6430000	6040000	6520000	4810000	4820000	5010000	4540000	4660000	4470000	5940000	5640000	5810000	4710000	4740000	4280000	4580000	4470000	4580000	5060000	5420000	5200000	6110000	5850000	5740000	4900000	4850000	4730000	4050000	3980000	4120000	2050000	4380000	3530000	18700000	9730000	11900000	4390000
Ethanol	208000000	206000000	214000000	93500000	99300000	62300000	77100000	97600000	66200000	89300000	89700000	83200000	98300000	97600000	125000000	131000000	132000000	133000000	139000000	148000000	147000000	217000000	146000000	190000000	202000000	215000000	192000000	103000000	99600000	111000000	96800000	96500000	98800000	208000000	209000000	227000000	135000000	112000000	80800000	77000000	76200000	99300000	50400000	88400000	75400000	140000000	88600000	107000000	165000000
Methanol	3360000	3300000	3440000	3760000	3780000	4190000	3610000	4110000	3640000	3930000	4400000	4360000	3300000	3150000	2920000	3500000	3510000	3520000	3130000	2820000	2880000	3460000	3950000	3270000	2890000	2700000	2600000	3950000	3940000	4340000	3840000	3700000	3690000	3310000	3460000	3480000	3660000	3710000	3970000	4120000	4280000	3860000	2890000	5190000	4410000	4140000	2660000	3140000	2940000
Trimethylamine	3120000	3240000	3370000	1090000	1140000	1030000	1210000	1460000	826000	1110000	1180000	1210000	1570000	1580000	1630000	4490000	4630000	4540000	1850000	1840000	1790000	5630000	4950000	4830000	1640000	1730000	1520000	4330000	4170000	4480000	2090000	2110000	2160000	2630000	2550000	2400000	2230000	2160000	2080000	1040000	931000	1050000	837000	1520000	1140000	3040000	1750000	2220000	3100000
Glycolate	5020000	4970000	5150000	6020000	6300000	6020000	4180000	4900000	3820000	6640000	7230000	7060000	6020000	5630000	6050000	3970000	3940000	3810000	5070000	4980000	5130000	3920000	3810000	3920000	6290000	5580000	5190000	6120000	5730000	6480000	5730000	5830000	5530000	4640000	4580000	4740000	5060000	4990000	4990000	4220000	4170000	4260000	3160000	5570000	4730000	5430000	2760000	3940000	3250000
Phenylacetate	441000	482000	502000	439000	476000	448000	304000	378000	278000	297000	356000	311000	407000	386000	409000	356000	348000	357000	325000	313000	326000	454000	439000	445000	472000	453000	417000	388000	390000	417000	462000	475000	447000	372000	370000	362000	398000	399000	400000	319000	299000	324000	229000	410000	339000	366000	187000	267000	310000
CRO vs no antibiotics
Peak	D1_CRO_1	D1_CRO_2	D1_CRO_3	D2_CRO_1	D2_CRO_2	D2_CRO_3	D3_CRO_1	D3_CRO_2	D3_CRO_3	D4_CRO_1	D4_CRO_2	D4_CRO_3	D5_CRO_1	D5_CRO_2	D5_CRO_3	D6_CRO_1	D6_CRO_2	D6_CRO_3	D7_CRO_1	D7_CRO_2	D7_CRO_3	D8_CRO_1	D8_CRO_2	D8_CRO_3	D9_CRO_1	D9_CRO_2	D9_CRO_3	D10_CRO_1	D10_CRO_2	D10_CRO_3	D11_CRO_1	D11_CRO_2	D11_CRO_3	D1_No_abx_1	D1_No_abx_2	D1_No_abx_3	D2_No_abx_1	D2_No_abx_2	D2_No_abx_3	D3_No_abx_1	D3_No_abx_2	D3_No_abx_3	D4_No_abx_1	D4_No_abx_2	D4_No_abx_3	D5_No_abx_1	D5_No_abx_2	D5_No_abx_3	D6_No_abx_1
Arabinose	1860000	1990000	2000000	1350000	1300000	1360000	1700000	1820000	1690000	1340000	1170000	1250000	2520000	1390000	2370000	1780000	1640000	1670000	1580000	1610000	1630000	1920000	1840000	1660000	1740000	2000000	1870000	1500000	2550000	1530000	2140000	2140000	2240000	2250000	2230000	2250000	2380000	2280000	2250000	1890000	1790000	1920000	1150000	2390000	1900000	2690000	1180000	1820000	1570000
Fructose	2060000	2150000	2170000	1270000	1180000	1230000	2320000	2500000	2340000	1410000	1260000	1330000	3910000	2660000	3790000	3720000	3620000	3530000	1480000	1530000	1520000	1910000	1830000	1730000	1870000	2190000	2010000	2910000	4030000	2900000	5250000	5190000	5420000	1590000	1590000	1620000	1670000	1620000	1610000	1550000	1510000	1570000	856000	1650000	1320000	1890000	962000	1360000	1460000
Fucose	2460000	2510000	2500000	1310000	1240000	1340000	1980000	2120000	1980000	2770000	2480000	2640000	2310000	1510000	2240000	2320000	2260000	2210000	1830000	1880000	1870000	2290000	2230000	2020000	2220000	2490000	2360000	1590000	2380000	1610000	2390000	2300000	2410000	2710000	2740000	2830000	2320000	2260000	2240000	1640000	1650000	1690000	1280000	2280000	1910000	2050000	1040000	1530000	1760000
Galactose	2040000	2050000	2020000	395000	303000	318000	1970000	2080000	1860000	294000	236000	269000	1500000	1020000	1510000	2500000	2510000	2420000	379000	414000	416000	535000	557000	438000	862000	931000	901000	1050000	1560000	1090000	2170000	2040000	2080000	522000	527000	534000	661000	677000	700000	474000	386000	461000	201000	393000	338000	503000	241000	380000	390000
Glucose	20900000	21300000	21200000	433000	308000	332000	21300000	23100000	20600000	5980000	3980000	3370000	16400000	13800000	15700000	18600000	19200000	18000000	1460000	1540000	1540000	2130000	1930000	1610000	9060000	9740000	8940000	13700000	16500000	15000000	22500000	21700000	21900000	999000	1120000	1390000	1240000	1280000	1280000	610000	583000	625000	580000	1180000	894000	810000	365000	584000	367000
Mannose	626000	645000	641000	145000	131000	131000	446000	472000	446000	365000	300000	297000	535000	535000	551000	599000	611000	600000	214000	225000	219000	438000	383000	332000	336000	382000	362000	563000	579000	582000	691000	625000	628000	488000	484000	530000	447000	457000	471000	308000	270000	306000	130000	272000	226000	376000	178000	289000	240000
Ribose	1520000	1480000	1560000	845000	825000	701000	1930000	2170000	1950000	1030000	868000	964000	1070000	1360000	1360000	1560000	1420000	1840000	775000	1060000	863000	1680000	1450000	1080000	1310000	1460000	1340000	1300000	1440000	1350000	1890000	1750000	1630000	996000	1010000	1130000	829000	1190000	1280000	803000	595000	741000	427000	636000	772000	916000	599000	1060000	633000
Xylose	3700000	3660000	3490000	681000	493000	475000	2690000	2950000	2650000	1190000	1070000	1120000	1320000	2280000	1340000	3870000	4010000	3680000	588000	747000	710000	2480000	2500000	2440000	1510000	1680000	1640000	2460000	1360000	2580000	3370000	2970000	2980000	1000000	973000	1000000	880000	819000	765000	1040000	1060000	1060000	321000	646000	514000	1180000	567000	827000	930000
N-acetylglucosamine	1210000	1230000	1190000	313000	175000	211000	1300000	1400000	1280000	647000	547000	601000	1150000	609000	1160000	944000	875000	918000	420000	611000	539000	407000	399000	309000	493000	550000	517000	719000	1230000	688000	873000	838000	851000	559000	609000	575000	515000	513000	557000	223000	169000	213000	187000	364000	304000	527000	260000	395000	210000
Maltose	336000	377000	456000	99300	94900	88000	280000	321000	295000	543000	427000	352000	953000	178000	891000	337000	256000	358000	235000	237000	231000	281000	243000	149000	525000	587000	535000	178000	988000	197000	878000	943000	1000000	630000	749000	1050000	757000	828000	853000	357000	309000	356000	554000	1050000	793000	246000	88800	182000	86000
Sucrose	79100	84900	119000	57800	65900	60700	98800	115000	112000	88700	80900	76600	193000	85900	188000	124000	77700	124000	98200	101000	104000	114000	96800	59400	104000	127000	107000	78500	209000	75200	559000	913000	1120000	127000	131000	149000	129000	133000	138000	119000	90400	118000	83700	161000	130000	132000	53500	101000	61300
Trehalose	561000	590000	567000	218000	176000	177000	433000	442000	424000	465000	412000	443000	624000	730000	624000	510000	521000	507000	365000	382000	382000	597000	559000	519000	514000	570000	538000	752000	655000	763000	723000	690000	743000	535000	537000	577000	318000	326000	312000	490000	501000	494000	145000	280000	237000	558000	272000	392000	427000
Alanine	12700000	12700000	11900000	12800000	11200000	12000000	13100000	13800000	12300000	13700000	12500000	13300000	10000000	13100000	9880000	12600000	13000000	12100000	6910000	7150000	6980000	12900000	12300000	12200000	11500000	12800000	12000000	13300000	10200000	14000000	12400000	11800000	12400000	9320000	9280000	9420000	8800000	8580000	8600000	9060000	9130000	9140000	7790000	13600000	11000000	11200000	6620000	8810000	10100000
Arginine	3230000	3470000	3290000	929000	723000	677000	3640000	3760000	3400000	1160000	859000	828000	2080000	2360000	2090000	2180000	2470000	2170000	639000	684000	652000	1150000	1100000	1070000	1560000	1640000	1570000	2450000	2110000	2520000	3010000	2800000	2870000	1420000	1410000	1440000	1100000	1080000	1060000	1840000	1850000	1850000	1230000	2090000	1840000	727000	483000	522000	602000
Aspartate	690000	730000	688000	669000	399000	474000	654000	709000	571000	501000	453000	493000	1130000	673000	1090000	753000	772000	683000	478000	472000	483000	666000	662000	626000	901000	987000	965000	728000	1140000	779000	1840000	1730000	1790000	1390000	1340000	1270000	674000	644000	624000	2180000	2140000	2210000	341000	630000	556000	837000	411000	606000	1090000
Glutamate	6590000	7230000	7010000	7130000	4750000	4190000	6750000	7080000	6500000	2890000	2530000	2770000	4650000	2150000	4560000	6630000	6780000	6320000	5500000	5690000	5620000	7220000	7010000	6740000	7330000	8200000	7630000	2520000	4820000	2250000	6250000	5900000	6170000	3170000	3070000	3110000	2640000	2700000	2240000	4640000	4580000	4660000	2770000	4980000	3880000	2860000	1460000	2040000	3750000
Glycine	13000000	12900000	12000000	12300000	10800000	11300000	13500000	14300000	12900000	14700000	13400000	14200000	12300000	15000000	12000000	13200000	13600000	12800000	13200000	13500000	13300000	11500000	11100000	11000000	11300000	12700000	11800000	15700000	12600000	16300000	13800000	13500000	14100000	9400000	9390000	9970000	7160000	6980000	6780000	7560000	7730000	7770000	6720000	11600000	9710000	11000000	6320000	8250000	7500000
Isoleucine	16600000	16600000	15300000	15800000	13500000	14500000	18100000	19100000	17200000	17000000	15500000	16700000	12400000	16400000	12300000	14300000	14900000	13600000	4830000	5240000	5010000	15000000	14600000	14600000	13000000	14500000	13600000	17200000	12700000	17700000	16200000	15300000	15900000	10100000	10000000	9930000	10500000	10400000	10500000	10700000	10700000	10700000	8220000	13900000	11100000	7820000	4290000	6480000	9510000
Leucine	29200000	29600000	27600000	26700000	24100000	25500000	28200000	30000000	27500000	28000000	25300000	27200000	23400000	26100000	23000000	27100000	27600000	25600000	4960000	5170000	5060000	27700000	26600000	26200000	24900000	27800000	26000000	27500000	23800000	28300000	28200000	26700000	27900000	21900000	21900000	22000000	22400000	21900000	22000000	23100000	23300000	23400000	16200000	28400000	23300000	12800000	6760000	10900000	21100000
Lysine	1350000	1460000	1340000	1670000	1300000	1420000	1780000	1910000	1580000	1160000	1050000	1100000	3980000	1490000	3760000	1460000	1520000	1450000	1410000	1520000	1530000	2180000	2560000	2510000	1280000	1440000	1380000	2690000	4040000	1320000	4640000	4490000	4640000	3570000	3560000	3580000	1480000	1470000	1490000	3530000	3470000	3550000	2730000	4790000	3860000	1700000	876000	1220000	1370000
Methionine	2330000	2350000	2220000	2030000	1880000	1980000	2430000	2600000	2330000	2270000	2070000	2220000	1940000	2140000	1910000	2220000	2220000	2040000	721000	767000	731000	2130000	2080000	2000000	2100000	2310000	2180000	2250000	1950000	2270000	2340000	2150000	2230000	1230000	1270000	1370000	1560000	1510000	1510000	1640000	1580000	1650000	1160000	2060000	1670000	1590000	830000	1220000	1490000
Phenylalanine	3880000	3920000	3620000	3620000	3160000	3430000	4020000	4280000	3830000	3690000	3340000	3570000	3030000	3620000	3050000	3620000	3740000	3340000	2050000	2120000	2080000	3480000	3390000	3360000	3350000	3670000	3470000	3800000	3010000	3940000	3820000	3510000	3650000	2540000	2510000	2540000	2460000	2420000	2430000	2740000	2730000	2770000	1860000	3330000	2630000	2790000	1540000	2050000	2500000
Proline	2100000	2130000	1940000	1770000	1520000	1670000	1970000	2070000	1890000	1980000	1750000	1870000	1650000	2210000	1610000	1600000	1700000	1500000	1370000	1410000	1410000	1460000	1420000	1410000	1910000	2090000	1990000	2320000	1670000	2410000	1970000	1850000	1920000	1010000	990000	1020000	755000	735000	748000	694000	704000	704000	595000	1080000	815000	974000	535000	709000	639000
Threonine	4380000	4490000	4090000	3750000	3260000	3440000	4230000	4510000	4050000	4810000	4200000	4500000	4100000	3630000	3990000	4260000	4410000	4090000	1860000	1990000	1920000	4010000	3810000	3810000	4120000	4680000	4330000	3840000	4210000	3900000	5110000	5250000	5560000	3850000	3870000	4040000	3670000	3560000	3540000	3710000	3830000	3760000	2470000	4380000	3570000	2540000	1380000	1990000	3670000
Tryptophan	1060000	1090000	1040000	933000	817000	877000	1030000	1100000	1010000	953000	876000	926000	920000	850000	908000	866000	855000	815000	968000	998000	995000	969000	941000	907000	942000	1040000	972000	895000	926000	923000	1020000	956000	1000000	886000	892000	909000	862000	841000	840000	840000	811000	846000	539000	997000	805000	997000	502000	722000	372000
Tyrosine	5780000	5850000	5380000	5240000	4220000	4770000	5870000	6260000	5510000	5780000	5170000	5560000	3910000	5200000	4030000	4780000	5110000	4260000	3820000	4010000	3950000	4430000	4360000	4400000	1490000	1510000	1480000	5470000	3830000	5620000	5100000	4570000	4690000	3780000	3810000	3860000	3410000	3340000	3390000	4050000	4100000	4080000	2780000	5190000	4060000	3600000	1910000	2590000	1160000
Valine	9640000	9650000	8830000	9740000	8340000	9020000	9940000	10400000	9170000	9490000	8640000	9270000	7070000	10400000	6990000	8460000	8710000	8010000	1360000	1470000	1420000	9070000	8790000	8770000	8410000	9340000	8790000	11000000	7200000	11300000	8680000	8200000	8450000	6410000	6420000	6480000	6730000	6600000	6650000	6900000	6940000	6950000	5050000	8660000	6990000	4900000	2710000	4130000	6510000
Uracil	517000	522000	488000	280000	246000	287000	605000	642000	562000	437000	395000	417000	480000	457000	491000	516000	530000	470000	228000	203000	218000	246000	264000	270000	427000	453000	440000	479000	429000	503000	507000	475000	496000	167000	168000	171000	257000	248000	279000	69000	44700	63100	135000	282000	191000	133000	58900	93500	86300
Succinate	111000000	115000000	111000000	4750000	35000000	37100000	116000000	121000000	115000000	131000000	114000000	123000000	138000000	22300000	133000000	84200000	84600000	80900000	4490000	4830000	4650000	47800000	45500000	43800000	149000000	169000000	151000000	25100000	141000000	22100000	71800000	71000000	75700000	30100000	30700000	32600000	14700000	14500000	15300000	3570000	3380000	3560000	2030000	3590000	2970000	5000000	2750000	3680000	27300000
Lactate	58600000	55800000	49300000	29000000	34700000	41100000	24800000	26600000	23900000	241000000	211000000	214000000	23200000	21900000	22800000	45000000	45600000	42600000	7650000	8010000	7950000	101000000	94300000	91700000	107000000	113000000	120000000	21800000	24000000	23300000	32000000	27500000	28800000	221000000	231000000	259000000	185000000	179000000	180000000	137000000	152000000	142000000	136000000	238000000	192000000	13200000	7300000	9750000	145000000
5-aminovalerate	2200000	2390000	2360000	2220000	2440000	2400000	2700000	2960000	2860000	1990000	1700000	1920000	2330000	1600000	2230000	2600000	2460000	2490000	3780000	3890000	3870000	2120000	2020000	1830000	1700000	1910000	1810000	1670000	2430000	1690000	2510000	2410000	2530000	2800000	2770000	2810000	3210000	3140000	3110000	3070000	2960000	3080000	1630000	2980000	2510000	3880000	2030000	2860000	2780000
Formate	115000	107000	103000	864000	1040000	808000	71100	73700	61600	72600	44100	72800	101000	1050000	99900	82100	99000	65700	603000	718000	676000	871000	933000	918000	59700	59200	63500	1080000	102000	1220000	735000	722000	747000	5760000	5820000	5470000	2120000	2000000	2300000	6680000	6510000	6590000	29600	122000	68000	1410000	826000	1270000	5970000
Acetate	158000000	154000000	144000000	154000000	149000000	161000000	152000000	160000000	152000000	227000000	204000000	216000000	102000000	207000000	103000000	211000000	205000000	201000000	110000000	113000000	115000000	255000000	240000000	239000000	123000000	134000000	125000000	216000000	105000000	226000000	129000000	122000000	128000000	357000000	366000000	392000000	367000000	355000000	353000000	312000000	328000000	324000000	180000000	321000000	254000000	284000000	171000000	215000000	353000000
Propionate	2720000	2790000	2700000	7580000	6550000	6520000	4190000	4190000	4010000	6670000	6020000	6240000	2920000	13600000	2930000	2860000	2680000	2750000	13000000	12700000	12800000	5090000	4940000	4690000	2980000	3240000	3060000	14000000	3030000	14700000	2220000	2150000	2290000	1420000	1430000	1420000	3460000	3400000	3370000	3580000	3500000	3630000	7410000	13300000	12000000	7230000	4130000	5390000	2460000
Butyrate	2860000	2630000	2530000	15300000	11900000	11800000	4150000	4590000	4490000	5020000	4600000	4930000	2340000	7110000	2300000	8930000	8360000	8640000	11700000	12300000	12100000	12900000	13000000	12500000	3010000	3270000	3020000	6940000	2530000	7470000	4720000	4500000	4760000	3900000	3770000	3500000	4580000	4510000	4140000	7800000	7670000	7980000	3330000	5910000	5320000	19900000	11400000	14700000	9810000
Valerate	2270000	2360000	2340000	2260000	1950000	2020000	2040000	2190000	2040000	1740000	1570000	1710000	3930000	1970000	3750000	2560000	2430000	2480000	27400000	28300000	27800000	3140000	3320000	3240000	1720000	1930000	1830000	2850000	4040000	1930000	4640000	4470000	4660000	4030000	3940000	3890000	2270000	2180000	2150000	3580000	3550000	3620000	2420000	4190000	3540000	8210000	4700000	5890000	2010000
Isobutyrate	785000	899000	841000	1950000	1560000	1560000	977000	1040000	998000	2080000	1650000	1610000	789000	2820000	832000	1090000	916000	1020000	11800000	11100000	11800000	1690000	1570000	1440000	993000	1160000	1020000	3200000	824000	3490000	637000	647000	651000	688000	700000	676000	1200000	1220000	1220000	1060000	1000000	1080000	1590000	3200000	2800000	5090000	2230000	2870000	1020000
Isovalerate	5080000	5400000	5060000	4220000	4210000	4160000	3140000	3450000	3330000	2950000	2490000	2830000	4610000	3200000	4470000	4450000	4320000	4460000	25500000	26400000	25900000	5260000	4930000	4680000	3660000	4200000	3920000	3340000	4900000	3410000	4870000	4680000	5030000	6110000	5850000	5740000	4900000	4850000	4730000	4050000	3980000	4120000	2050000	4380000	3530000	18700000	9730000	11900000	4390000
Ethanol	209000000	212000000	205000000	95000000	94900000	73800000	70800000	72500000	70100000	79900000	83000000	82800000	103000000	99100000	98200000	139000000	148000000	128000000	133000000	133000000	141000000	203000000	208000000	189000000	181000000	228000000	204000000	98000000	105000000	105000000	96900000	98300000	102000000	208000000	209000000	227000000	135000000	112000000	80800000	77000000	76200000	99300000	50400000	88400000	75400000	140000000	88600000	107000000	165000000
Methanol	3440000	3600000	3300000	4910000	4580000	5070000	4500000	4710000	4320000	4410000	3690000	4040000	3390000	4400000	3470000	3360000	3220000	3400000	3130000	3130000	3060000	3670000	3580000	3870000	3100000	3000000	2960000	4530000	3460000	4920000	3880000	3790000	4040000	3310000	3460000	3480000	3660000	3710000	3970000	4120000	4280000	3860000	2890000	5190000	4410000	4140000	2660000	3140000	2940000
Trimethylamine	2460000	2360000	2240000	4110000	3930000	3320000	1040000	1140000	1100000	2550000	2240000	2240000	1720000	3770000	1730000	3470000	3330000	3400000	1980000	1990000	2010000	2420000	2310000	2280000	2070000	2310000	2180000	3900000	1820000	4030000	1670000	1610000	1720000	2630000	2550000	2400000	2230000	2160000	2080000	1040000	931000	1050000	837000	1520000	1140000	3040000	1750000	2220000	3100000
Glycolate	5720000	5980000	5800000	5050000	4350000	4630000	5340000	5710000	5240000	5280000	4710000	4920000	6090000	4750000	5910000	5100000	5200000	4930000	4440000	4600000	4510000	4360000	4220000	4050000	4570000	5110000	4800000	4950000	6240000	5080000	6750000	6410000	6810000	4640000	4580000	4740000	5060000	4990000	4990000	4220000	4170000	4260000	3160000	5570000	4730000	5430000	2760000	3940000	3250000
Phenylacetate	407000	421000	419000	387000	349000	357000	361000	390000	368000	327000	278000	298000	429000	317000	417000	443000	410000	438000	778000	790000	792000	418000	403000	372000	368000	413000	387000	325000	441000	338000	451000	446000	460000	372000	370000	362000	398000	399000	400000	319000	299000	324000	229000	410000	339000	366000	187000	267000	310000
CAZ vs no antibiotics
Peak	D1_CAZ_1	D1_CAZ_2	D1_CAZ_3	D2_CAZ_1	D2_CAZ_2	D2_CAZ_3	D3_CAZ_1	D3_CAZ_2	D3_CAZ_3	D4_CAZ_1	D4_CAZ_2	D4_CAZ_3	D5_CAZ_1	D5_CAZ_2	D5_CAZ_3	D6_CAZ_1	D6_CAZ_2	D6_CAZ_3	D7_CAZ_1	D7_CAZ_2	D7_CAZ_3	D8_CAZ_1	D8_CAZ_2	D8_CAZ_3	D9_CAZ_1	D9_CAZ_2	D9_CAZ_3	D10_CAZ_1	D10_CAZ_2	D10_CAZ_3	D11_CAZ_1	D11_CAZ_2	D11_CAZ_3	D1_No_abx_1	D1_No_abx_2	D1_No_abx_3	D2_No_abx_1	D2_No_abx_2	D2_No_abx_3	D3_No_abx_1	D3_No_abx_2	D3_No_abx_3	D4_No_abx_1	D4_No_abx_2	D4_No_abx_3	D5_No_abx_1	D5_No_abx_2	D5_No_abx_3	D6_No_abx_1
Arabinose	1830000	1840000	1710000	1930000	1280000	2480000	1760000	1710000	1780000	1970000	1860000	1830000	2440000	2430000	2570000	1870000	1740000	1580000	2170000	2140000	2110000	1430000	1410000	1380000	1440000	1330000	1470000	1480000	1590000	1770000	1970000	1980000	1780000	2250000	2230000	2250000	2380000	2280000	2250000	1890000	1790000	1920000	1150000	2390000	1900000	2690000	1180000	1820000	1570000
Fructose	1580000	1460000	1420000	1600000	1060000	1700000	1800000	1810000	1800000	2650000	2690000	2640000	2200000	2190000	2270000	2600000	2510000	2270000	2780000	2730000	2630000	1630000	1530000	1590000	1510000	1320000	1540000	1510000	1610000	1630000	2370000	2350000	2190000	1590000	1590000	1620000	1670000	1620000	1610000	1550000	1510000	1570000	856000	1650000	1320000	1890000	962000	1360000	1460000
Fucose	2560000	2480000	2400000	2230000	1550000	2350000	2060000	2020000	2120000	2380000	2390000	2330000	2460000	2440000	2530000	2300000	2170000	2010000	2020000	2290000	2220000	1520000	1510000	1460000	1880000	1730000	1980000	1340000	1440000	1450000	2170000	2160000	2000000	2710000	2740000	2830000	2320000	2260000	2240000	1640000	1650000	1690000	1280000	2280000	1910000	2050000	1040000	1530000	1760000
Galactose	2100000	1790000	1730000	980000	645000	683000	1560000	1550000	1510000	904000	931000	875000	1060000	969000	1070000	1710000	1650000	1530000	573000	644000	630000	346000	277000	323000	283000	243000	286000	721000	669000	758000	1280000	1350000	1130000	522000	527000	534000	661000	677000	700000	474000	386000	461000	201000	393000	338000	503000	241000	380000	390000
Glucose	15600000	14500000	13900000	12000000	6960000	1230000	12500000	12800000	11900000	16400000	16900000	16400000	9770000	9570000	10300000	10900000	10800000	10100000	4630000	8170000	7360000	3270000	3680000	3190000	812000	706000	733000	6530000	5460000	6620000	10000000	11000000	9240000	999000	1120000	1390000	1240000	1280000	1280000	610000	583000	625000	580000	1180000	894000	810000	365000	584000	367000
Mannose	335000	354000	349000	415000	300000	444000	427000	432000	444000	474000	494000	452000	472000	426000	487000	527000	510000	477000	301000	314000	304000	196000	177000	186000	177000	155000	192000	328000	353000	383000	504000	495000	433000	488000	484000	530000	447000	457000	471000	308000	270000	306000	130000	272000	226000	376000	178000	289000	240000
Ribose	1230000	1040000	1150000	992000	936000	774000	1350000	1740000	1480000	1220000	1460000	1340000	1350000	891000	1270000	1540000	1590000	1600000	1090000	1080000	1050000	716000	557000	688000	886000	718000	936000	886000	962000	1230000	1290000	1120000	1080000	996000	1010000	1130000	829000	1190000	1280000	803000	595000	741000	427000	636000	772000	916000	599000	1060000	633000
Xylose	2730000	2290000	2150000	798000	509000	876000	1890000	1890000	1910000	703000	671000	663000	1260000	1280000	1270000	3090000	2960000	2730000	673000	678000	681000	880000	701000	703000	1550000	1270000	1540000	2290000	2450000	2650000	1810000	1890000	1700000	1000000	973000	1000000	880000	819000	765000	1040000	1060000	1060000	321000	646000	514000	1180000	567000	827000	930000
N-acetylglucosamine	557000	425000	464000	501000	307000	514000	483000	513000	474000	1070000	1070000	1010000	533000	477000	530000	481000	454000	421000	563000	823000	776000	228000	202000	217000	294000	237000	276000	237000	241000	272000	481000	482000	398000	559000	609000	575000	515000	513000	557000	223000	169000	213000	187000	364000	304000	527000	260000	395000	210000
Maltose	129000	249000	230000	546000	424000	757000	400000	420000	397000	554000	525000	489000	901000	846000	971000	383000	361000	357000	672000	660000	678000	237000	398000	263000	93400	88100	97100	103000	114000	132000	1410000	1420000	1230000	630000	749000	1050000	757000	828000	853000	357000	309000	356000	554000	1050000	793000	246000	88800	182000	86000
Sucrose	60500	66800	71600	101000	77000	122000	117000	120000	123000	139000	131000	124000	153000	117000	166000	139000	129000	124000	130000	136000	134000	62200	106000	68200	58200	51800	57000	58000	66100	69500	419000	443000	394000	127000	131000	149000	129000	133000	138000	119000	90400	118000	83700	161000	130000	132000	53500	101000	61300
Trehalose	442000	436000	397000	275000	185000	322000	472000	481000	494000	347000	347000	333000	521000	478000	496000	473000	449000	431000	415000	406000	414000	139000	111000	127000	361000	335000	371000	731000	795000	808000	724000	723000	660000	535000	537000	577000	318000	326000	312000	490000	501000	494000	145000	280000	237000	558000	272000	392000	427000
Alanine	13400000	12000000	11300000	11300000	8140000	9080000	11200000	10900000	11400000	11300000	11500000	10900000	10300000	10400000	10500000	11600000	11000000	10300000	13100000	12400000	12200000	10900000	11100000	10000000	12000000	11300000	12400000	11700000	12600000	12700000	11100000	11000000	10600000	9320000	9280000	9420000	8800000	8580000	8600000	9060000	9130000	9140000	7790000	13600000	11000000	11200000	6620000	8810000	10100000
Arginine	3040000	3160000	2840000	2060000	1290000	1120000	2900000	2970000	2920000	2950000	2970000	2840000	1470000	1370000	1330000	1690000	1610000	1710000	1510000	1840000	1810000	780000	831000	775000	690000	621000	693000	1650000	1660000	1800000	1870000	2010000	1740000	1420000	1410000	1440000	1100000	1080000	1060000	1840000	1850000	1850000	1230000	2090000	1840000	727000	483000	522000	602000
Aspartate	635000	651000	625000	472000	293000	688000	1370000	1460000	1280000	1190000	1090000	1170000	1120000	1120000	1170000	730000	687000	635000	616000	611000	609000	570000	557000	560000	651000	521000	589000	1760000	1810000	1880000	626000	620000	568000	1390000	1340000	1270000	674000	644000	624000	2180000	2140000	2210000	341000	630000	556000	837000	411000	606000	1090000
Glutamate	7070000	7380000	7330000	7660000	5060000	2540000	6990000	6730000	7160000	6470000	6780000	6270000	6440000	6450000	6590000	6390000	6100000	5700000	5330000	5370000	5270000	6530000	6670000	6570000	9070000	8370000	9230000	7660000	8310000	8370000	7220000	7130000	6860000	3170000	3070000	3110000	2640000	2700000	2240000	4640000	4580000	4660000	2770000	4980000	3880000	2860000	1460000	2040000	3750000
Glycine	9660000	7820000	7720000	12700000	8890000	7030000	12400000	12200000	12700000	12700000	13200000	12400000	12300000	12400000	12700000	11700000	11200000	10400000	11200000	11300000	10900000	10400000	10800000	10300000	14000000	13000000	14600000	13200000	14100000	14300000	13400000	13400000	12800000	9400000	9390000	9970000	7160000	6980000	6780000	7560000	7730000	7770000	6720000	11600000	9710000	11000000	6320000	8250000	7500000
Isoleucine	18000000	15300000	14600000	14600000	10200000	10900000	15500000	15200000	15600000	15400000	16000000	15100000	12000000	12000000	12100000	12800000	12100000	11400000	12700000	12900000	12500000	12900000	13200000	12900000	14300000	13200000	14700000	13800000	14700000	14900000	14600000	14500000	13800000	10100000	10000000	9930000	10500000	10400000	10500000	10700000	10700000	10700000	8220000	13900000	11100000	7820000	4290000	6480000	9510000
Leucine	29500000	27300000	25900000	25500000	18000000	23300000	27100000	26700000	27600000	26600000	27000000	25800000	23700000	23800000	24200000	25600000	24300000	22700000	25100000	25000000	24300000	24300000	24800000	24200000	24700000	22900000	25600000	24600000	26400000	26800000	26800000	26700000	25700000	21900000	21900000	22000000	22400000	21900000	22000000	23100000	23300000	23400000	16200000	28400000	23300000	12800000	6760000	10900000	21100000
Lysine	2410000	1150000	1140000	2770000	1530000	1530000	4150000	4120000	4100000	4730000	4780000	4580000	3910000	3990000	3990000	4050000	3870000	3570000	3620000	3830000	3670000	1690000	1730000	1770000	4000000	3680000	4190000	4180000	4500000	4560000	4360000	4350000	4180000	3570000	3560000	3580000	1480000	1470000	1490000	3530000	3470000	3550000	2730000	4790000	3860000	1700000	876000	1220000	1370000
Methionine	2090000	2150000	2030000	1980000	1390000	1600000	2170000	2140000	2210000	2190000	2220000	2140000	1790000	1780000	1820000	2030000	1900000	1790000	1860000	1900000	1850000	1860000	1930000	1860000	2060000	1950000	2120000	1920000	2090000	2090000	2050000	2030000	1910000	1230000	1270000	1370000	1560000	1510000	1510000	1640000	1580000	1650000	1160000	2060000	1670000	1590000	830000	1220000	1490000
Phenylalanine	4100000	3580000	3380000	3320000	2310000	2570000	3550000	3510000	3610000	3720000	3820000	3630000	2820000	2810000	2880000	3320000	3100000	2930000	3250000	3310000	3230000	2900000	2970000	2900000	3450000	3180000	3560000	3340000	3560000	3650000	3240000	3220000	3040000	2540000	2510000	2540000	2460000	2420000	2430000	2740000	2730000	2770000	1860000	3330000	2630000	2790000	1540000	2050000	2500000
Proline	2180000	1930000	1870000	1740000	1270000	777000	1500000	1460000	1510000	1480000	1540000	1430000	1470000	1490000	1490000	1410000	1340000	1250000	1180000	1230000	1210000	1260000	1320000	1260000	1980000	1860000	2040000	1750000	1870000	1910000	1590000	1580000	1520000	1010000	990000	1020000	755000	735000	748000	694000	704000	704000	595000	1080000	815000	974000	535000	709000	639000
Threonine	4780000	4170000	4060000	3780000	2720000	3750000	3970000	3960000	4030000	4300000	4330000	4120000	3990000	4030000	4120000	4120000	3850000	3510000	4130000	4140000	3970000	2630000	2650000	2610000	3350000	3100000	3410000	3490000	3710000	3810000	4400000	4420000	4270000	3850000	3870000	4040000	3670000	3560000	3540000	3710000	3830000	3760000	2470000	4380000	3570000	2540000	1380000	1990000	3670000
Tryptophan	1090000	1010000	957000	887000	612000	893000	978000	965000	996000	997000	1000000	955000	878000	854000	907000	780000	725000	684000	1040000	1030000	1010000	805000	826000	816000	960000	897000	1000000	788000	843000	867000	979000	981000	904000	886000	892000	909000	862000	841000	840000	840000	811000	846000	539000	997000	805000	997000	502000	722000	372000
Tyrosine	6360000	5660000	5380000	4520000	3050000	3610000	5220000	5130000	5300000	5290000	5450000	5170000	4180000	4170000	4260000	4500000	4160000	3950000	4650000	4650000	4530000	3560000	3670000	3540000	4510000	4100000	4740000	4590000	4900000	5000000	4920000	4850000	4600000	3780000	3810000	3860000	3410000	3340000	3390000	4050000	4100000	4080000	2780000	5190000	4060000	3600000	1910000	2590000	1160000
Valine	11200000	9700000	9200000	8560000	6040000	7020000	8550000	8360000	8700000	8180000	8440000	7930000	7290000	7330000	7440000	8240000	7840000	7320000	7370000	7330000	7140000	8330000	8600000	8350000	9410000	8740000	9700000	8900000	9520000	9660000	8740000	8730000	8360000	6410000	6420000	6480000	6730000	6600000	6650000	6900000	6940000	6950000	5050000	8660000	6990000	4900000	2710000	4130000	6510000
Uracil	436000	375000	355000	363000	256000	273000	382000	380000	401000	314000	370000	314000	224000	203000	201000	390000	353000	348000	220000	227000	214000	446000	464000	453000	386000	361000	401000	423000	439000	458000	273000	268000	217000	167000	168000	171000	257000	248000	279000	69000	44700	63100	135000	282000	191000	133000	58900	93500	86300
Succinate	110000000	100000000	92200000	77400000	46000000	16600000	3870000	3910000	4050000	119000000	117000000	110000000	46800000	47600000	47600000	67200000	64200000	59300000	35900000	46900000	45700000	4320000	4960000	3850000	10100000	9870000	10000000	3830000	4140000	4210000	58700000	58000000	56800000	30100000	30700000	32600000	14700000	14500000	15300000	3570000	3380000	3560000	2030000	3590000	2970000	5000000	2750000	3680000	27300000
Lactate	58500000	66000000	64800000	22500000	16200000	190000000	77100000	77000000	78300000	58500000	58500000	56800000	142000000	141000000	145000000	83300000	77500000	70300000	87100000	112000000	111000000	48900000	45900000	40500000	26100000	24300000	27400000	47300000	50400000	51500000	46200000	46400000	45000000	221000000	231000000	259000000	185000000	179000000	180000000	137000000	152000000	142000000	136000000	238000000	192000000	13200000	7300000	9750000	145000000
5-aminovalerate	1730000	1880000	1810000	2070000	1500000	3310000	2540000	2530000	2610000	2630000	2580000	2550000	2150000	2080000	2200000	2560000	2430000	2260000	3100000	3060000	3010000	1820000	1810000	1780000	1350000	1250000	1400000	2130000	2310000	2350000	2130000	2110000	1960000	2800000	2770000	2810000	3210000	3140000	3110000	3070000	2960000	3080000	1630000	2980000	2510000	3880000	2030000	2860000	2780000
Formate	1850000	1400000	1380000	1670000	1490000	2330000	2070000	1800000	1780000	3310000	3270000	2980000	2100000	2060000	2330000	109000	99600	87200	63100	66500	84000	372000	510000	268000	60900	54500	58900	308000	337000	485000	2810000	2840000	2610000	5760000	5820000	5470000	2120000	2000000	2300000	6680000	6510000	6590000	29600	122000	68000	1410000	826000	1270000	5970000
Acetate	170000000	165000000	159000000	106000000	81800000	380000000	187000000	191000000	194000000	168000000	162000000	160000000	93900000	94200000	94900000	232000000	216000000	195000000	183000000	171000000	171000000	237000000	243000000	233000000	133000000	125000000	138000000	118000000	123000000	124000000	123000000	121000000	119000000	357000000	366000000	392000000	367000000	355000000	353000000	312000000	328000000	324000000	180000000	321000000	254000000	284000000	171000000	215000000	353000000
Propionate	2800000	2710000	2560000	6160000	5140000	3490000	5140000	4930000	5260000	3290000	3140000	3200000	2160000	2130000	2180000	2610000	2470000	2300000	15900000	12800000	12600000	9910000	9720000	10300000	7790000	7360000	8190000	8120000	8750000	8760000	2260000	2210000	2100000	1420000	1430000	1420000	3460000	3400000	3370000	3580000	3500000	3630000	7410000	13300000	12000000	7230000	4130000	5390000	2460000
Butyrate	11900000	10600000	9750000	14900000	12600000	4780000	12000000	11200000	13200000	3450000	3310000	3370000	9870000	9920000	10300000	16300000	15300000	14600000	3640000	3000000	3030000	15500000	16400000	15000000	16500000	15400000	17400000	21200000	24100000	24000000	17800000	16800000	17000000	3900000	3770000	3500000	4580000	4510000	4140000	7800000	7670000	7980000	3330000	5910000	5320000	19900000	11400000	14700000	9810000
Valerate	2840000	3460000	3290000	3500000	2830000	3460000	2850000	2840000	3030000	1760000	1650000	1710000	3350000	3540000	3370000	4270000	4040000	3880000	4530000	3250000	3360000	4810000	4830000	4670000	3920000	3770000	4200000	3490000	4040000	4080000	3780000	3740000	3830000	3900000	3720000	3580000	3380000	3340000	3220000	3170000	3270000	3190000	1650000	2760000	2480000	12100000	7080000	8750000	3900000
Isobutyrate	885000	775000	924000	1490000	1250000	1260000	1200000	1120000	1200000	976000	887000	1030000	468000	528000	560000	1050000	896000	646000	3840000	3400000	3380000	2700000	2530000	2710000	2070000	1560000	2120000	1740000	1830000	2140000	563000	550000	558000	688000	700000	676000	1200000	1220000	1220000	1060000	1000000	1080000	1590000	3200000	2800000	5090000	2230000	2870000	1020000
Isovalerate	4370000	4870000	4510000	4540000	3070000	5090000	3770000	3820000	4040000	3290000	3160000	3090000	4250000	4130000	4310000	4940000	4680000	4290000	5150000	4920000	4840000	5560000	5720000	5630000	3630000	3410000	3720000	3000000	3350000	3370000	4480000	4350000	4210000	6110000	5850000	5740000	4900000	4850000	4730000	4050000	3980000	4120000	2050000	4380000	3530000	18700000	9730000	11900000	4390000
Ethanol	198000000	202000000	195000000	110000000	79700000	90300000	76600000	84600000	102000000	68400000	75500000	82600000	108000000	112000000	112000000	150000000	141000000	126000000	124000000	132000000	120000000	200000000	220000000	214000000	220000000	189000000	252000000	98100000	110000000	107000000	107000000	103000000	96300000	208000000	209000000	227000000	135000000	112000000	80800000	77000000	76200000	99300000	50400000	88400000	75400000	140000000	88600000	107000000	165000000
Methanol	4250000	3940000	3630000	4530000	3540000	4160000	4500000	4300000	4320000	4520000	4260000	4010000	3350000	3330000	3370000	4700000	4140000	4200000	3050000	3100000	3280000	5600000	5870000	5480000	3810000	3660000	3660000	6890000	7390000	7790000	4010000	4210000	3980000	3310000	3460000	3480000	3660000	3710000	3970000	4120000	4280000	3860000	2890000	5190000	4410000	4140000	2660000	3140000	2940000
Trimethylamine	2630000	2660000	2550000	1390000	1090000	2330000	1140000	1120000	1160000	917000	905000	926000	1630000	1640000	1700000	3600000	3400000	3140000	1690000	1650000	1620000	3090000	3230000	3110000	5310000	5110000	5470000	3440000	3720000	3750000	1940000	1910000	1850000	2630000	2550000	2400000	2230000	2160000	2080000	1040000	931000	1050000	837000	1520000	1140000	3040000	1750000	2220000	3100000
Glycolate	4840000	4640000	4620000	5420000	3790000	5190000	4650000	4650000	4680000	6050000	6030000	5820000	5370000	5270000	5630000	4530000	4290000	3960000	5390000	5430000	5280000	3490000	3530000	3430000	4330000	3960000	4450000	4520000	4880000	5010000	5000000	4990000	4680000	4640000	4580000	4740000	5060000	4990000	4990000	4220000	4170000	4260000	3160000	5570000	4730000	5430000	2760000	3940000	3250000
Phenylacetate	363000	358000	366000	393000	272000	414000	387000	389000	399000	362000	357000	359000	342000	326000	353000	407000	407000	380000	434000	437000	431000	427000	428000	428000	348000	310000	359000	309000	328000	338000	430000	422000	399000	372000	370000	362000	398000	399000	400000	319000	299000	324000	229000	410000	339000	366000	187000	267000	310000
CTX vs no antibiotics
Peak	D1_CTX_1	D1_CTX_2	D1_CTX_3	D2_CTX_1	D2_CTX_2	D2_CTX_3	D3_CTX_1	D3_CTX_2	D3_CTX_3	D4_CTX_1	D4_CTX_2	D4_CTX_3	D5_CTX_1	D5_CTX_2	D5_CTX_3	D6_CTX_1	D6_CTX_2	D6_CTX_3	D7_CTX_1	D7_CTX_2	D7_CTX_3	D8_CTX_1	D8_CTX_2	D8_CTX_3	D9_CTX_1	D9_CTX_2	D9_CTX_3	D10_CTX_1	D10_CTX_2	D10_CTX_3	D11_CTX_1	D11_CTX_2	D11_CTX_3	D1_No_abx_1	D1_No_abx_2	D1_No_abx_3	D2_No_abx_1	D2_No_abx_2	D2_No_abx_3	D3_No_abx_1	D3_No_abx_2	D3_No_abx_3	D4_No_abx_1	D4_No_abx_2	D4_No_abx_3	D5_No_abx_1	D5_No_abx_2	D5_No_abx_3	D6_No_abx_1
Arabinose	1770000	1820000	1820000	2300000	2080000	2200000	1230000	1270000	1320000	1840000	1850000	1840000	1800000	1720000	1910000	1520000	1400000	1420000	1890000	1620000	1860000	1480000	1390000	1430000	1350000	1400000	1440000	1570000	1440000	1480000	1730000	1940000	1780000	2250000	2230000	2250000	2380000	2280000	2250000	1890000	1790000	1920000	1150000	2390000	1900000	2690000	1180000	1820000	1570000
Fructose	1400000	1520000	1670000	2520000	2280000	2150000	1220000	1230000	1270000	2600000	2660000	2590000	1720000	1670000	1830000	1630000	1500000	1590000	1700000	1470000	1560000	1370000	1290000	1290000	1330000	1360000	1360000	1800000	1600000	1640000	1760000	1920000	1740000	1590000	1590000	1620000	1670000	1620000	1610000	1550000	1510000	1570000	856000	1650000	1320000	1890000	962000	1360000	1460000
Fucose	2440000	2490000	2640000	2420000	2250000	2380000	1520000	1500000	1540000	2260000	2300000	2230000	2300000	2240000	2420000	2090000	1890000	1980000	1740000	1430000	1610000	1230000	1150000	1170000	1280000	1270000	1280000	1390000	1280000	1320000	1880000	2060000	1970000	2710000	2740000	2830000	2320000	2260000	2240000	1640000	1650000	1690000	1280000	2280000	1910000	2050000	1040000	1530000	1760000
Galactose	1850000	1990000	2140000	1260000	1220000	1050000	295000	317000	444000	955000	976000	978000	939000	932000	1010000	370000	295000	374000	617000	451000	525000	292000	276000	222000	228000	228000	214000	735000	670000	716000	838000	981000	1020000	522000	527000	534000	661000	677000	700000	474000	386000	461000	201000	393000	338000	503000	241000	380000	390000
Glucose	14000000	18600000	16500000	19400000	18600000	16300000	992000	1090000	3530000	17300000	18000000	17200000	10300000	11800000	11100000	1240000	1140000	1360000	1340000	912000	1070000	273000	265000	243000	319000	360000	309000	7920000	6980000	7750000	5680000	6340000	6480000	999000	1120000	1390000	1240000	1280000	1280000	610000	583000	625000	580000	1180000	894000	810000	365000	584000	367000
Mannose	336000	334000	352000	582000	521000	560000	282000	266000	286000	439000	449000	446000	427000	385000	435000	372000	316000	355000	274000	177000	224000	186000	174000	170000	174000	168000	165000	283000	265000	272000	381000	458000	440000	488000	484000	530000	447000	457000	471000	308000	270000	306000	130000	272000	226000	376000	178000	289000	240000
Ribose	1230000	1320000	1750000	1600000	1530000	1360000	1090000	777000	807000	1240000	1270000	1280000	1180000	883000	1050000	1100000	879000	1070000	1420000	903000	869000	497000	462000	485000	1010000	927000	804000	986000	914000	999000	766000	1270000	1280000	996000	1010000	1130000	829000	1190000	1280000	803000	595000	741000	427000	636000	772000	916000	599000	1060000	633000
Xylose	2360000	2630000	2730000	977000	844000	849000	1300000	1370000	1460000	725000	744000	734000	1270000	1340000	1400000	1370000	1120000	1290000	565000	496000	558000	530000	503000	492000	1270000	1440000	1300000	1130000	1070000	1140000	1740000	1830000	1820000	1000000	973000	1000000	880000	819000	765000	1040000	1060000	1060000	321000	646000	514000	1180000	567000	827000	930000
N-acetylglucosamine	453000	532000	609000	1280000	1120000	1070000	209000	219000	196000	1010000	1030000	1010000	456000	416000	488000	316000	257000	288000	924000	701000	813000	146000	138000	131000	154000	155000	130000	291000	251000	269000	344000	413000	413000	559000	609000	575000	515000	513000	557000	223000	169000	213000	187000	364000	304000	527000	260000	395000	210000
Maltose	383000	250000	210000	572000	544000	728000	134000	115000	204000	572000	533000	578000	870000	800000	880000	128000	108000	130000	294000	161000	264000	69800	70200	68600	94900	97400	96900	125000	120000	121000	1050000	1250000	1100000	630000	749000	1050000	757000	828000	853000	357000	309000	356000	554000	1050000	793000	246000	88800	182000	86000
Sucrose	61500	64100	66600	165000	157000	160000	60700	61400	66400	137000	132000	136000	165000	111000	154000	62800	56600	64300	122000	68700	105000	37900	41600	40900	51000	54900	52500	70600	67900	66300	250000	363000	288000	127000	131000	149000	129000	133000	138000	119000	90400	118000	83700	161000	130000	132000	53500	101000	61300
Trehalose	530000	556000	602000	428000	404000	397000	423000	404000	464000	332000	339000	321000	514000	507000	532000	362000	323000	351000	436000	383000	396000	190000	186000	182000	377000	387000	377000	896000	840000	838000	716000	782000	735000	535000	537000	577000	318000	326000	312000	490000	501000	494000	145000	280000	237000	558000	272000	392000	427000
Alanine	10700000	11800000	12500000	11100000	10300000	10500000	11000000	11200000	11200000	10900000	11000000	10900000	11000000	11100000	11700000	11100000	10200000	10500000	5460000	5070000	5230000	10400000	9390000	9870000	11300000	11100000	11500000	12300000	11600000	11900000	10500000	11100000	10700000	9320000	9280000	9420000	8800000	8580000	8600000	9060000	9130000	9140000	7790000	13600000	11000000	11200000	6620000	8810000	10100000
Arginine	2140000	2560000	2620000	2930000	3050000	2580000	1570000	1520000	1810000	2910000	3030000	2830000	1600000	1770000	1670000	828000	747000	807000	605000	537000	533000	422000	410000	403000	755000	758000	764000	1900000	1790000	1780000	1710000	1670000	1730000	1420000	1410000	1440000	1100000	1080000	1060000	1840000	1850000	1850000	1230000	2090000	1840000	727000	483000	522000	602000
Aspartate	672000	797000	830000	596000	544000	572000	499000	469000	500000	759000	744000	815000	1120000	1110000	1180000	617000	562000	583000	518000	427000	503000	556000	530000	522000	982000	995000	1020000	1810000	1720000	1780000	975000	1010000	965000	1390000	1340000	1270000	674000	644000	624000	2180000	2140000	2210000	341000	630000	556000	837000	411000	606000	1090000
Glutamate	5960000	6760000	7220000	5740000	5350000	4860000	7540000	7620000	7730000	6280000	6390000	6430000	6270000	6300000	6640000	5870000	5270000	5490000	5540000	5140000	5320000	2320000	2350000	2700000	7480000	7360000	7690000	7020000	6630000	6770000	6690000	7140000	6860000	3170000	3070000	3110000	2640000	2700000	2240000	4640000	4580000	4660000	2770000	4980000	3880000	2860000	1460000	2040000	3750000
Glycine	10400000	11600000	12300000	12200000	11600000	11600000	11600000	11500000	12000000	12300000	12500000	12200000	11500000	11900000	12500000	10200000	9380000	9760000	13700000	12700000	12800000	9230000	8580000	8830000	12500000	12500000	12800000	12400000	11700000	12000000	12200000	13000000	12300000	9400000	9390000	9970000	7160000	6980000	6780000	7560000	7730000	7770000	6720000	11600000	9710000	11000000	6320000	8250000	7500000
Isoleucine	13800000	16000000	17300000	14600000	13300000	13800000	14800000	14900000	14800000	15000000	15500000	15200000	11700000	11900000	12500000	11400000	10400000	10800000	4840000	4770000	4540000	9610000	8770000	8980000	12400000	12100000	12600000	11800000	11100000	11400000	12900000	13700000	13300000	10100000	10000000	9930000	10500000	10400000	10500000	10700000	10700000	10700000	8220000	13900000	11100000	7820000	4290000	6480000	9510000
Leucine	26100000	27400000	29200000	26100000	23700000	25000000	24300000	24200000	24600000	25500000	26100000	25400000	23200000	23300000	24500000	23100000	21100000	21900000	5570000	5150000	5310000	17900000	16000000	16600000	23900000	23600000	24500000	24000000	22400000	23100000	24600000	26100000	24900000	21900000	21900000	22000000	22400000	21900000	22000000	23100000	23300000	23400000	16200000	28400000	23300000	12800000	6760000	10900000	21100000
Lysine	3740000	3940000	4150000	1520000	1680000	1520000	3730000	3490000	3620000	4440000	4540000	4480000	1130000	1190000	1320000	1690000	1590000	1620000	2040000	1820000	1830000	1720000	1490000	1550000	898000	921000	870000	2180000	2020000	2080000	3970000	4200000	4000000	3570000	3560000	3580000	1480000	1470000	1490000	3530000	3470000	3550000	2730000	4790000	3860000	1700000	876000	1220000	1370000
Methionine	1980000	2100000	2180000	2070000	1910000	1920000	1940000	1950000	1970000	2100000	2150000	2110000	1790000	1780000	1900000	1730000	1580000	1640000	628000	509000	655000	431000	416000	424000	1870000	1810000	1930000	1870000	1740000	1800000	1820000	1960000	1900000	1230000	1270000	1370000	1560000	1510000	1510000	1640000	1580000	1650000	1160000	2060000	1670000	1590000	830000	1220000	1490000
Phenylalanine	3320000	3670000	3940000	3460000	3130000	3280000	3350000	3410000	3380000	3580000	3640000	3590000	2780000	2850000	3050000	2890000	2640000	2740000	1280000	1170000	1240000	2780000	2650000	2670000	3130000	3090000	3180000	3260000	3070000	3140000	2990000	3140000	3060000	2540000	2510000	2540000	2460000	2420000	2430000	2740000	2730000	2770000	1860000	3330000	2630000	2790000	1540000	2050000	2500000
Proline	1650000	1820000	1920000	1950000	1740000	1810000	1590000	1630000	1620000	1430000	1470000	1440000	1460000	1540000	1590000	1230000	1110000	1150000	1370000	1310000	1320000	1130000	1070000	1070000	1750000	1720000	1780000	1660000	1560000	1580000	1480000	1540000	1510000	1010000	990000	1020000	755000	735000	748000	694000	704000	704000	595000	1080000	815000	974000	535000	709000	639000
Threonine	4030000	4540000	4840000	4160000	3690000	4110000	3470000	3500000	3630000	4040000	4070000	4030000	3880000	3950000	4100000	3790000	3420000	3640000	2030000	1880000	1890000	1260000	1220000	1230000	3240000	3180000	3310000	4110000	3770000	3920000	3880000	4160000	3860000	3850000	3870000	4040000	3670000	3560000	3540000	3710000	3830000	3760000	2470000	4380000	3570000	2540000	1380000	1990000	3670000
Tryptophan	971000	1010000	1080000	965000	895000	925000	847000	853000	861000	936000	945000	928000	867000	854000	918000	647000	586000	620000	1100000	993000	1040000	825000	776000	787000	817000	821000	827000	751000	702000	706000	879000	961000	904000	886000	892000	909000	862000	841000	840000	840000	811000	846000	539000	997000	805000	997000	502000	722000	372000
Tyrosine	5240000	5800000	6070000	4400000	3970000	4230000	4810000	4870000	4850000	4990000	5090000	5040000	1760000	2000000	2520000	1210000	1070000	1130000	3250000	3050000	3110000	3410000	3210000	3240000	4100000	4080000	4140000	4140000	3890000	3990000	4510000	4740000	4610000	3780000	3810000	3860000	3410000	3340000	3390000	4050000	4100000	4080000	2780000	5190000	4060000	3600000	1910000	2590000	1160000
Valine	8600000	9740000	10400000	8470000	7680000	8060000	8620000	8720000	8700000	7840000	7970000	7920000	7380000	7550000	7960000	7720000	7020000	7270000	1540000	1510000	1460000	6540000	5900000	6090000	8430000	8250000	8600000	7770000	7390000	7540000	8020000	8510000	8170000	6410000	6420000	6480000	6730000	6600000	6650000	6900000	6940000	6950000	5050000	8660000	6990000	4900000	2710000	4130000	6510000
Uracil	361000	382000	411000	640000	594000	575000	434000	431000	426000	311000	314000	336000	210000	236000	274000	288000	248000	254000	262000	233000	258000	383000	372000	375000	272000	265000	277000	335000	323000	326000	275000	299000	294000	167000	168000	171000	257000	248000	279000	69000	44700	63100	135000	282000	191000	133000	58900	93500	86300
Succinate	67800000	68700000	73100000	148000000	136000000	140000000	3530000	3770000	3700000	121000000	120000000	118000000	19900000	19200000	25300000	65400000	58700000	60800000	4680000	4310000	4450000	3570000	3460000	3540000	19700000	20100000	21700000	4360000	4070000	4110000	57000000	61400000	59400000	30100000	30700000	32600000	14700000	14500000	15300000	3570000	3380000	3560000	2030000	3590000	2970000	5000000	2750000	3680000	27300000
Lactate	107000000	118000000	117000000	45700000	26600000	83300000	17500000	18600000	18200000	37600000	38500000	38300000	104000000	101000000	105000000	117000000	110000000	116000000	7410000	6430000	6920000	3820000	3670000	3660000	16200000	16400000	16600000	32900000	31200000	33400000	27300000	29100000	27300000	221000000	231000000	259000000	185000000	179000000	180000000	137000000	152000000	142000000	136000000	238000000	192000000	13200000	7300000	9750000	145000000
5-aminovalerate	1780000	1700000	1790000	2480000	2290000	2450000	2160000	2090000	2260000	2530000	2600000	2510000	2090000	2010000	2200000	2280000	2080000	2160000	4390000	3840000	4110000	1820000	1730000	1790000	1450000	1420000	1490000	2670000	2470000	2550000	1880000	2070000	1950000	2800000	2770000	2810000	3210000	3140000	3110000	3070000	2960000	3080000	1630000	2980000	2510000	3880000	2030000	2860000	2780000
Formate	5270000	5200000	5260000	330000	269000	411000	743000	1250000	556000	2790000	2770000	2790000	2550000	2540000	2760000	1130000	754000	1130000	328000	265000	305000	850000	556000	537000	52900	55200	56900	315000	304000	289000	1910000	1980000	1760000	5760000	5820000	5470000	2120000	2000000	2300000	6680000	6510000	6590000	29600	122000	68000	1410000	826000	1270000	5970000
Acetate	159000000	163000000	173000000	148000000	112000000	187000000	132000000	131000000	131000000	140000000	141000000	137000000	91800000	89000000	96000000	277000000	260000000	265000000	120000000	121000000	119000000	202000000	191000000	197000000	152000000	149000000	153000000	200000000	187000000	187000000	102000000	106000000	101000000	357000000	366000000	392000000	367000000	355000000	353000000	312000000	328000000	324000000	180000000	321000000	254000000	284000000	171000000	215000000	353000000
Propionate	2070000	2090000	2290000	4100000	3380000	3590000	9860000	10400000	10300000	3180000	3250000	3110000	4160000	4120000	4300000	2480000	2260000	2320000	16600000	15600000	15500000	15100000	14800000	14700000	7100000	6970000	7180000	15300000	14300000	14100000	2470000	2720000	2640000	1420000	1430000	1420000	3460000	3400000	3370000	3580000	3500000	3630000	7410000	13300000	12000000	7230000	4130000	5390000	2460000
Butyrate	6230000	5390000	5760000	2720000	2430000	2720000	21900000	20400000	24200000	3490000	3580000	3390000	11200000	11300000	12000000	19100000	16700000	17100000	11800000	10700000	11200000	18900000	18200000	18600000	18600000	19100000	19000000	11200000	11400000	11300000	20800000	22200000	21000000	3900000	3770000	3500000	4580000	4510000	4140000	7800000	7670000	7980000	3330000	5910000	5320000	19900000	11400000	14700000	9810000
Valerate	2800000	2250000	2420000	2300000	2110000	2170000	3910000	3620000	4310000	1660000	1730000	1560000	3280000	3450000	3300000	4830000	4290000	4370000	28100000	26600000	26900000	9300000	8810000	9180000	3870000	3770000	3820000	2690000	2630000	2630000	4000000	4080000	3800000	3900000	3720000	3580000	3380000	3340000	3220000	3170000	3270000	3190000	1650000	2760000	2480000	12100000	7080000	8750000	3900000
Isobutyrate	644000	609000	709000	1240000	891000	1140000	2070000	2380000	2150000	820000	833000	847000	896000	838000	965000	1090000	945000	1010000	13400000	11900000	12800000	5040000	5480000	5190000	1700000	1690000	1850000	3540000	3190000	3680000	640000	681000	664000	688000	700000	676000	1200000	1220000	1220000	1060000	1000000	1080000	1590000	3200000	2800000	5090000	2230000	2870000	1020000
Isovalerate	4570000	4190000	4750000	4630000	4240000	4290000	3370000	3180000	3280000	3000000	3070000	2820000	3970000	3830000	4080000	4580000	4080000	4310000	27600000	25600000	26000000	12600000	13100000	13100000	4160000	4030000	4270000	3350000	3060000	3080000	4050000	4640000	4170000	6110000	5850000	5740000	4900000	4850000	4730000	4050000	3980000	4120000	2050000	4380000	3530000	18700000	9730000	11900000	4390000
Ethanol	208000000	192000000	218000000	60800000	114000000	84300000	72700000	71800000	91300000	84900000	72200000	60900000	95400000	107000000	115000000	145000000	129000000	135000000	147000000	132000000	134000000	198000000	179000000	193000000	209000000	220000000	213000000	105000000	103000000	99600000	99000000	109000000	107000000	208000000	209000000	227000000	135000000	112000000	80800000	77000000	76200000	99300000	50400000	88400000	75400000	140000000	88600000	107000000	165000000
Methanol	3480000	3560000	3710000	4550000	3420000	4080000	4730000	4770000	4460000	3900000	4210000	4240000	3410000	3410000	3610000	4510000	4090000	4180000	2970000	2980000	3300000	5190000	5150000	4830000	3720000	3570000	3860000	5060000	4950000	5080000	4270000	4340000	4190000	3310000	3460000	3480000	3660000	3710000	3970000	4120000	4280000	3860000	2890000	5190000	4410000	4140000	2660000	3140000	2940000
Trimethylamine	2750000	2750000	2870000	1590000	1260000	1850000	1200000	983000	1240000	1050000	1030000	999000	1650000	1660000	1770000	3810000	3500000	3560000	2120000	1970000	1990000	6790000	6480000	6610000	6300000	6260000	6470000	3950000	3750000	3840000	2230000	2380000	2260000	2630000	2550000	2400000	2230000	2160000	2080000	1040000	931000	1050000	837000	1520000	1140000	3040000	1750000	2220000	3100000
Glycolate	4510000	4870000	5090000	6300000	5930000	6020000	3680000	3710000	3800000	5800000	5940000	5880000	4270000	4410000	4730000	3160000	2890000	3010000	4380000	3950000	4160000	3470000	3310000	3330000	3990000	4010000	4060000	4740000	4380000	4510000	4480000	4840000	4560000	4640000	4580000	4740000	5060000	4990000	4990000	4220000	4170000	4260000	3160000	5570000	4730000	5430000	2760000	3940000	3250000
Phenylacetate	363000	364000	403000	466000	429000	409000	306000	291000	301000	347000	353000	345000	311000	295000	338000	325000	295000	308000	1040000	941000	974000	434000	426000	425000	360000	356000	367000	297000	289000	300000	376000	417000	397000	372000	370000	362000	398000	399000	400000	319000	299000	324000	229000	410000	339000	366000	187000	267000	310000
[truncated: 17 more columns]

## Sheet: dataset-4
Compound Name (nmol/g)	NS_1	NS_2	NS_3	NS_4	NS_5	NS_6	NS_7	NS_8
L-Glutamic acid	4060.05	3910	2088.87	3583.58	4728.93	4449.87	3242.25	1672.07
L-Lysine	3776.46	1696.99	894.577	2928.88	4755.76	4107.79	3287.85	1355.04
L-Valine	2851.53	1637.93	607.21	2055.92	3848.16	3282.93	2569.45	852.643
L-Arginine	2282.04	1164.07	279.764	1601.56	3629.14	3782.9	2400.71	945.991
L-Leucine	2131.38	1230.27	344.342	1520.84	2844.86	2443	1874.31	551.159
L-Glutamine	2044.71	1580.19	375.604	1904.24	2325.27	2460.4	2104.17	1261.02
L-Aspartic acid	1882.94	997.223	522.259	1514.69	2237.33	2423.46	1419.78	647.911
L-Alanine	1787.5	1534.91	988.103	1642.78	2297.63	2418.2	1719.73	1168.6
L-Isoleucine	1559.34	801.634	256.781	1013.37	1844.99	1593.98	1163.15	382.053
Taurine	1475.85	1610.87	642.113	1136.04	2178.7	2216.05	1165.72	859.385
5-Aminovaleric acid	1339.03	2284.58	1114.45	45.3652	31.5456	49.184	99.3993	52.4843
L-Proline	1272.1	1414.35	2055.2	1708.83	1418.81	1219.87	1263.45	1240.09
L-Phenylalanine	1024.46	700.574	248.388	748.656	1204.84	1225.73	927.471	307.179
L-Serine	990.39	222.584	83.4634	898.755	720.285	1376.57	806.056	324.382
L-Threonine	914.053	425.781	228.566	740.313	1265.91	1033.35	753.783	352.965
D-Alanine	812.497	428.005	314.817	680.083	681.499	588.757	461.557	219.091
L-Methionine	810.826	575.471	141.121	535.726	968.331	1017.24	596.58	188.458
Glycine	765.34	599.398	484.365	765.113	897.543	883.457	813.897	520.484
L-Histidine	727.008	261.714	552.012	972.607	881.079	1073.51	1047.75	785.647
L-Cysteine	605.111	416.51	568.047	536.77	530.68	560.068	482.575	569.603
D-Proline	593.641	779.641	631.304	2.57972	3.13824	0.146708	1.02619	0.217062
L-Citrulline	562.512	1213.91	409.873	358.965	346.91	486.995	193.408	211.524
L-Tyrosine	486.473	321.654	202.121	465.299	639.602	646.618	490.767	206.9
Ethanolamine	282.027	242.283	28.5457	147.246	433.096	444.572	168.959	97.1066
D-Isoleucine	254.985	145.995	229.408	375.145	227.736	130.392	203.563	107.82
L-Ornithine	227.021	117.956	143.957	232.206	122.286	151.969	44.7405	13.7124
L-Tryptophan	220.126	86.4615	35.0157	162.378	267.024	257.379	282.009	84.9636
trans-L-Hydroxyproline	186.289	133.168	216.568	182.516	178.064	155.445	224.631	164.896
L-Asparagine	111.515	46.606	13.2918	101.746	301.023	170.38	414.589	68.8312
L-2-Aminobutyric acid	65.0847	60.0881	31.9242	30.0716	31.8713	15.708	19.8354	12.9448
L-Argininosuccinic acid	63.822	54.4799	69.5672	154.639	281.988	266.25	105.903	85.3023
D-Valine	56.2336	40.4379	109.068	72.4433	37.6331	27.7362	36.0983	19.8139
D-Leucine	54.9441	22.9857	69.4452	56.6107	27.0592	30.8277	27.3689	24.4766
Gamma-Aminobutyric acid	53.775	83.8622	73.4835	48.9231	67.3014	91.3679	46.5729	28.3714
L-Pipecolic acid	42.1062	43.6356	75.0585	37.938	52.5894	25.0825	31.2054	22.2945
D-Ornithine	41.0798	81.9891	4.57132	1.30919	0.92284	0.720136	0.726012	1.21411
Symmetric dimethylarginine	38.8668	30.4246	59.1748	44.4327	32.1081	35.1777	48.5957	39.743
D-Glutamic acid	32.2214	26.2096	61.3455	53.3927	32.5122	26.0669	24.8005	19.7747
D-Cysteine	30.2187	17.4538	32.6306	34.6871	21.3847	13.9269	23.9744	25.6088
beta-Alanine	29.8072	20.0508	11.2415	25.8947	30.6502	24.3264	22.2102	15.1213
D-Methionine	28.1109	38.7873	18.5526	20.9375	64.7427	30.4562	17.7378	10.2292
L-Homoserine	25.8357	25.0359	25.4562	19.8097	22.7826	41.0773	13.8825	15.3904
L-Cystine	18.9755	4.07658	3.52627	13.5745	34.8874	17.234	28.3438	5.7807
D-Phenylalanine	14.714	7.81778	29.3883	11.9933	4.25783	5.28755	3.37219	2.08229
2-Aminoisobutyric acid	12.5497	8.19621	2.16089	10.2566	23.2375	19.4899	11.2322	3.65792
L-Homoarginine	12.4361	5.76414	5.21568	10.21	10.1417	6.25419	14.3716	10.129
D-Lysine	9.39978	39.0173	3.87883	4.15198	3.5918	3.91099	3.28367	2.21416
D-Tyrosine	9.17763	3.52598	14.9915	0.876577	0.749943	0.602681	0.558544	0.388081
D-Serine	8.46239	6.73493	1.9104	9.90563	2.73598	15.6106	8.50358	3.97568
D-Glutamine	8.24684	6.87049	10.211	4.92044	2.97423	3.14951	3.43156	3.18316
D-Aspartic acid	8.11482	36.7122	67.9275	102.728	145.646	50.0358	53.8665	40.2183
Glutathione	5.58447	49.7303	9.82479	7.46318	22.8446	70.0024	3.43776	3.31572
D-Arginine	4.82921	68.468	6.04147	4.64532	2.90123	5.96869	4.27571	6.89724
(S)-beta-Aminoisobutyric acid	4.37679	3.19256	3.92369	0.330907	0.233043	0.420465	0.583953	0.605024
D-Histidine	3.40645	1.79095	1.26317	0.621227	0.55986	0.41682	0.741386	0.348963
L-2-Aminoadipic acid	3.25676	4.11039	2.86161	2.1741	4.34134	3.76397	1.99009	1.4635
L-gamma-glutamyl-L-cysteine	2.96208	2.90204	1.14375	2.04433	5.45924	9.1067	1.63176	1.60181
L-Homocitrulline	2.09543	2.6662	1.02885	1.22688	3.18363	2.47386	1.36536	0.684665
D-Threonine	1.9522	0.769508	0.623225	1.80883	1.78308	2.49499	1.79732	1.0248
1-Methyl-L-histidine	1.92744	2.38109	0.964995	1.39075	1.93507	1.79063	1.38563	0.755966
3-Methyl-histidine	1.12063	2.68993	0.94619	1.2085	1.71856	1.74154	1.43008	0.971638
L-2,4-diaminobutyric acid	0.874476	1.36078	1.68048	0.694239	0.684976	0.710154	0.343093	0.490303
L-Kynurenine	0.86819	1.10266	0.134432	0.335343	0.826249	0.46548	0.302137	0.128185
D-Citrulline	0.777265	1.91798	0.492242	0.138276	0.202541	0.163113	0.0590301	0.0906182
D-Tryptophan	0.465858	0.389222	0.406738	0.176388	0.181009	0.0998351	0.197618	0.0964089
L-Carnosine	0.36987	0.47192	0.712842	0.860715	0.679127	0.811665	0.805526	0.581533
L-Cysteic acid	0.342752	0.387328	0.373561	0.50921	0.311271	0.645265	0.451478	0.374516
L-Homocystine	0.0146679	0.122871	0.344015	0.0342422	0.0111694	0	0.00552231	0
D-Cystine	0.00247489	0.0119158	0.0315447	0.0135137	0.0271269	0.0133091	0.0301659	0.0216246
4-Aminobenzoic acid	0	0	0	0	0	0	0	0
D-Asparagine	0	0	0	0	0	0	0	0
