# Supplementary material for: Host-derived arginine promotes Klebsiella pneumoniae colonization and dissemination through ArtP–ArgR–capsule signaling
Source: Research Square preprint supplement (doi:10.21203/rs.3.rs-8289577/v1), 2025-12-17
Supplement: Supplementary file 2 [file c71796e12bda23c4444cde84.docx]

**Table S1 Bacterial strains and plasmids used in this study**

| **Strain** | **Characteristics** | **Reference** |
| --- | --- | --- |
| NTUH-K2044 | ST23-KL1, hypervirulent *K. pneumoniae* | Lab stock |
| FK3009 | ST11-KL64, hypervirulent and carbapenem-resistant *K. pneumoniae* | This study |
| MG1655 | *E. coli*, used as the template for amplification of the lacZ gene, which was subsequently fused downstream of target promoters to generate transcriptional reporter constructs for β-galactosidase assays. | Lab stock |
| NTUH-K2044△*argR* | derived from NTUH-K2044, HygR | This study |
| NTUH-K2044△*argR*-C | NTUH-K2044△argR complemented with the pACYC-argR plasmid, HygR, and AprR | This study |
| NTUH-K2044△*artP* | Derived from NTUH-K2044, HygR | This study |
| FK3009△argR | Derived from FK3009, HygR | This study |
| FK3009△argR-C | FK3009△argR complemented with the pACYC-argR plasmid, HygR, and AprR | This study |
| **Plasmid** |  |  |
| pACYC184-Apr | Deived from pACYC-184, p15A ori, medium copy number, AprR | This study |
| pET-30a(+) -argR | Expression vector carrying *argR* under T7 promoter; used for recombinant ArgR protein expression and purification in *E. coli* BL21(DE3). | This study |
| pET-28a(+) | Used as a backbone for the lacZ reporter plasmid carrying the *rop* gene, used for β-galactosidase assays to evaluate promoter activity; *rop* stabilizes plasmid copy number by regulating ColE1 replication control. | This study |
| pACYC-argR | Deived from pACYC-Apr, complementation plasmid, AprR | This study |

**Table S2 Primers used in this study**

| Oligonucleotides | Sequence (5'-3') |
| --- | --- |
| **For RT-qPCR** |  |
| qrmpA-F | AGGGAAATGGGGAGGGTACA |
| qrmpA-R | ACGTCAAGCCACATCCATTG |
| qargR-F | CACCAAATTCTTCAGCGGGC |
| qargR-R | ACCCGTAACGCCAAAATGGA |
| qgalF-KL64-F | ATGATCGCCCGCTTTAACGA |
| qgalF-KL64-R | CGGCTCTTTGGTCTGGATGA |
| qwzi-KL64-F | TCGCGTATTATGCAGTGGGG |
| qwzi-KL64-R | GTTCGTTGGCTGTCCCAGTA |
| qwcaj-KL64-F | CTGCAGTCACGTACTGAGGAA |
| qwcaj-KL64-R | TGCCATTCAAAGGCGTATCG |
| qgalF-KL1-F | AGACCAAAGAGCCGATGGTG |
| qgalF-KL1-R | GCCATCAGATCGGAGTCCAG |
| qwzi-KL1-F | AGAATGAGCCGGGAAACCAG |
| qwzi-KL1-R | AGAAGCTAACTGGCCAACCC |
| qwcaj-KL1-F | CGAGGTCCTACAACGGACAT |
| qwcaj-KL1-R | GCGTGACTAAAGTCGGCAAG |
| q-ropB-F | ATATGATCAACGCCAAGCCG |
| q-ropB-R | ATCTCAGACAGCGGGTTGTT |
| **For argR knock out** |  |
| Hyg-F | AGAGAGCCACTGCGGGATCGT |
| Hyg-R | ATCCCCTGATTCCCTTTGTCAACAGC |
| argR-up-F | CTTAGATCTACCGCCACGCC |
| argR-up-R | ATTACGGTGACGATCCCGCAGTGGCTCTCTAAGTCACCCAGATTATGGTGGT |
| argR-down-F | CATTGCTGTTGACAAAGGGAATCAGGGGATGTAATTCCCCTCTGGCTACCG |
| argR-down-R | TGCGGTAAGAAGAAGCCCCT |
| For artP knock out |  |
| artP-up-F | ACGGCGGTGTCACCAAAGA |
| artP-up-R | ATTACGGTGACGATCCCGCAGTGGCTCTCTCCGCAAACTGACGCGTTT |
| artP-down-F | CATTGCTGTTGACAAAGGGAATCAGGGGATGGCCGCAAATACTACCTTTG |
| artP-down-R | AGAATCGTACTCAGGATCCG |
| **For argR complementation** |  |
| argR-F | TTATTCCGTCGCCTGGAC |
| argR-R | GGGAATTACTCAGAGTTCCTGC |
| pACYC-F | TTGTGAATTAAGGTCCAGGCGACGGAATAATCATGAGCTCAGCCAATCGAC |
| pACYC-R | AATTGCTAACGCAGTCAGGCGGGAATTACTCAGAGTTCCTGCTCAAACAG |
| **For β-galactosidase assays** |  |
| rmpA-pro-F | AACGAGAGAGGATGCTCACGATACGGGTTACGGATATCAAGGAGAACAATAT |
| rmpA-pro-R | GACGGCCAGTGAATCCGTAATCATGGTCATAGAAACAGTAACTTTGATCCATC |
| KL64-wzi-pro-F | AACGAGAGAGGATGCTCACGATACGGGTTACTGAAATCGCCTTCTGCA |
| KL64-wzi-pro-R | GACGGCCAGTGAATCCGTAATCATGGTCATTGTACAAGATCCATTTTCAGCC |
| KL64-galF-pro-F | AACGAGAGAGGATGCTCACGATACGGGTTACGCTCATAAAACCGGCATA |
| KL64-galF-pro-R | GACGGCCAGTGAATCCGTAATCATGGTCATATTCATCTTCACCTGTTTGG |
| KL1-wzi-pro-F | AACGAGAGAGGATGCTCACGATACGGGTTAGAGGTTCGGTGGATAAGAG |
| KL1-wzi-pro-R | GACGGCCAGTGAATCCGTAATCATGGTCATTGTACAAGATCCATTTTCAGCC |
| KL1-galF-pro-F | AACGAGAGAGGATGCTCACGATACGGGTTACGCTCACAAAACCAGCAT |
| KL1-galF-pro-R | GACGGCCAGTGAATCCGTAATCATGGTCATCTTCACCTGTTTGGTTGC |
| lacZ-F | ATGACCATGATTACGGATTCAC |
| lacZ-R | TTATTTTTGACACCAGACCAAC |
| pET28a-F | TTACCAGTTGGTCTGGTGTCAAAAATAATATATCCGGATTGGCGAATGGG |
| pET28a-R | TAACCCGTATCGTGAGCATC |
| **For EMSA** |  |
| EMSA-rmpA-pro-F | TAGCCTGGATCATGTGGT |
| EMSA-rmpA-pro-R | TTTTTTTAACCCGCCCCC |
| EMSA-KL64-galF-pro-F | CGCTCATAAAACCGGCATA |
| EMSA-KL64-galF-pro-R | ATTCATCTTCACCTGTTTGG |
| EMSA-KL64-wzi-pro-F | CTGAAATCGCCTTCTGCA |
| EMSA-KL64-wzi-pro-R | TGTACAAGATCCATTTTCAGCC |
| EMSA-KL1-galF-pro-F | CGCTCACAAAACCAGCAT |
| EMSA-KL1-galF-pro-R | CTTCACCTGTTTGGTTGC |
| EMSA-KL1-wzi-pro-F | GAGGTTCGGTGGATAAGAG |
| EMSA-KL1-wzi-pro-R | TGTACAAGATCCATTTTCAGCC |

**
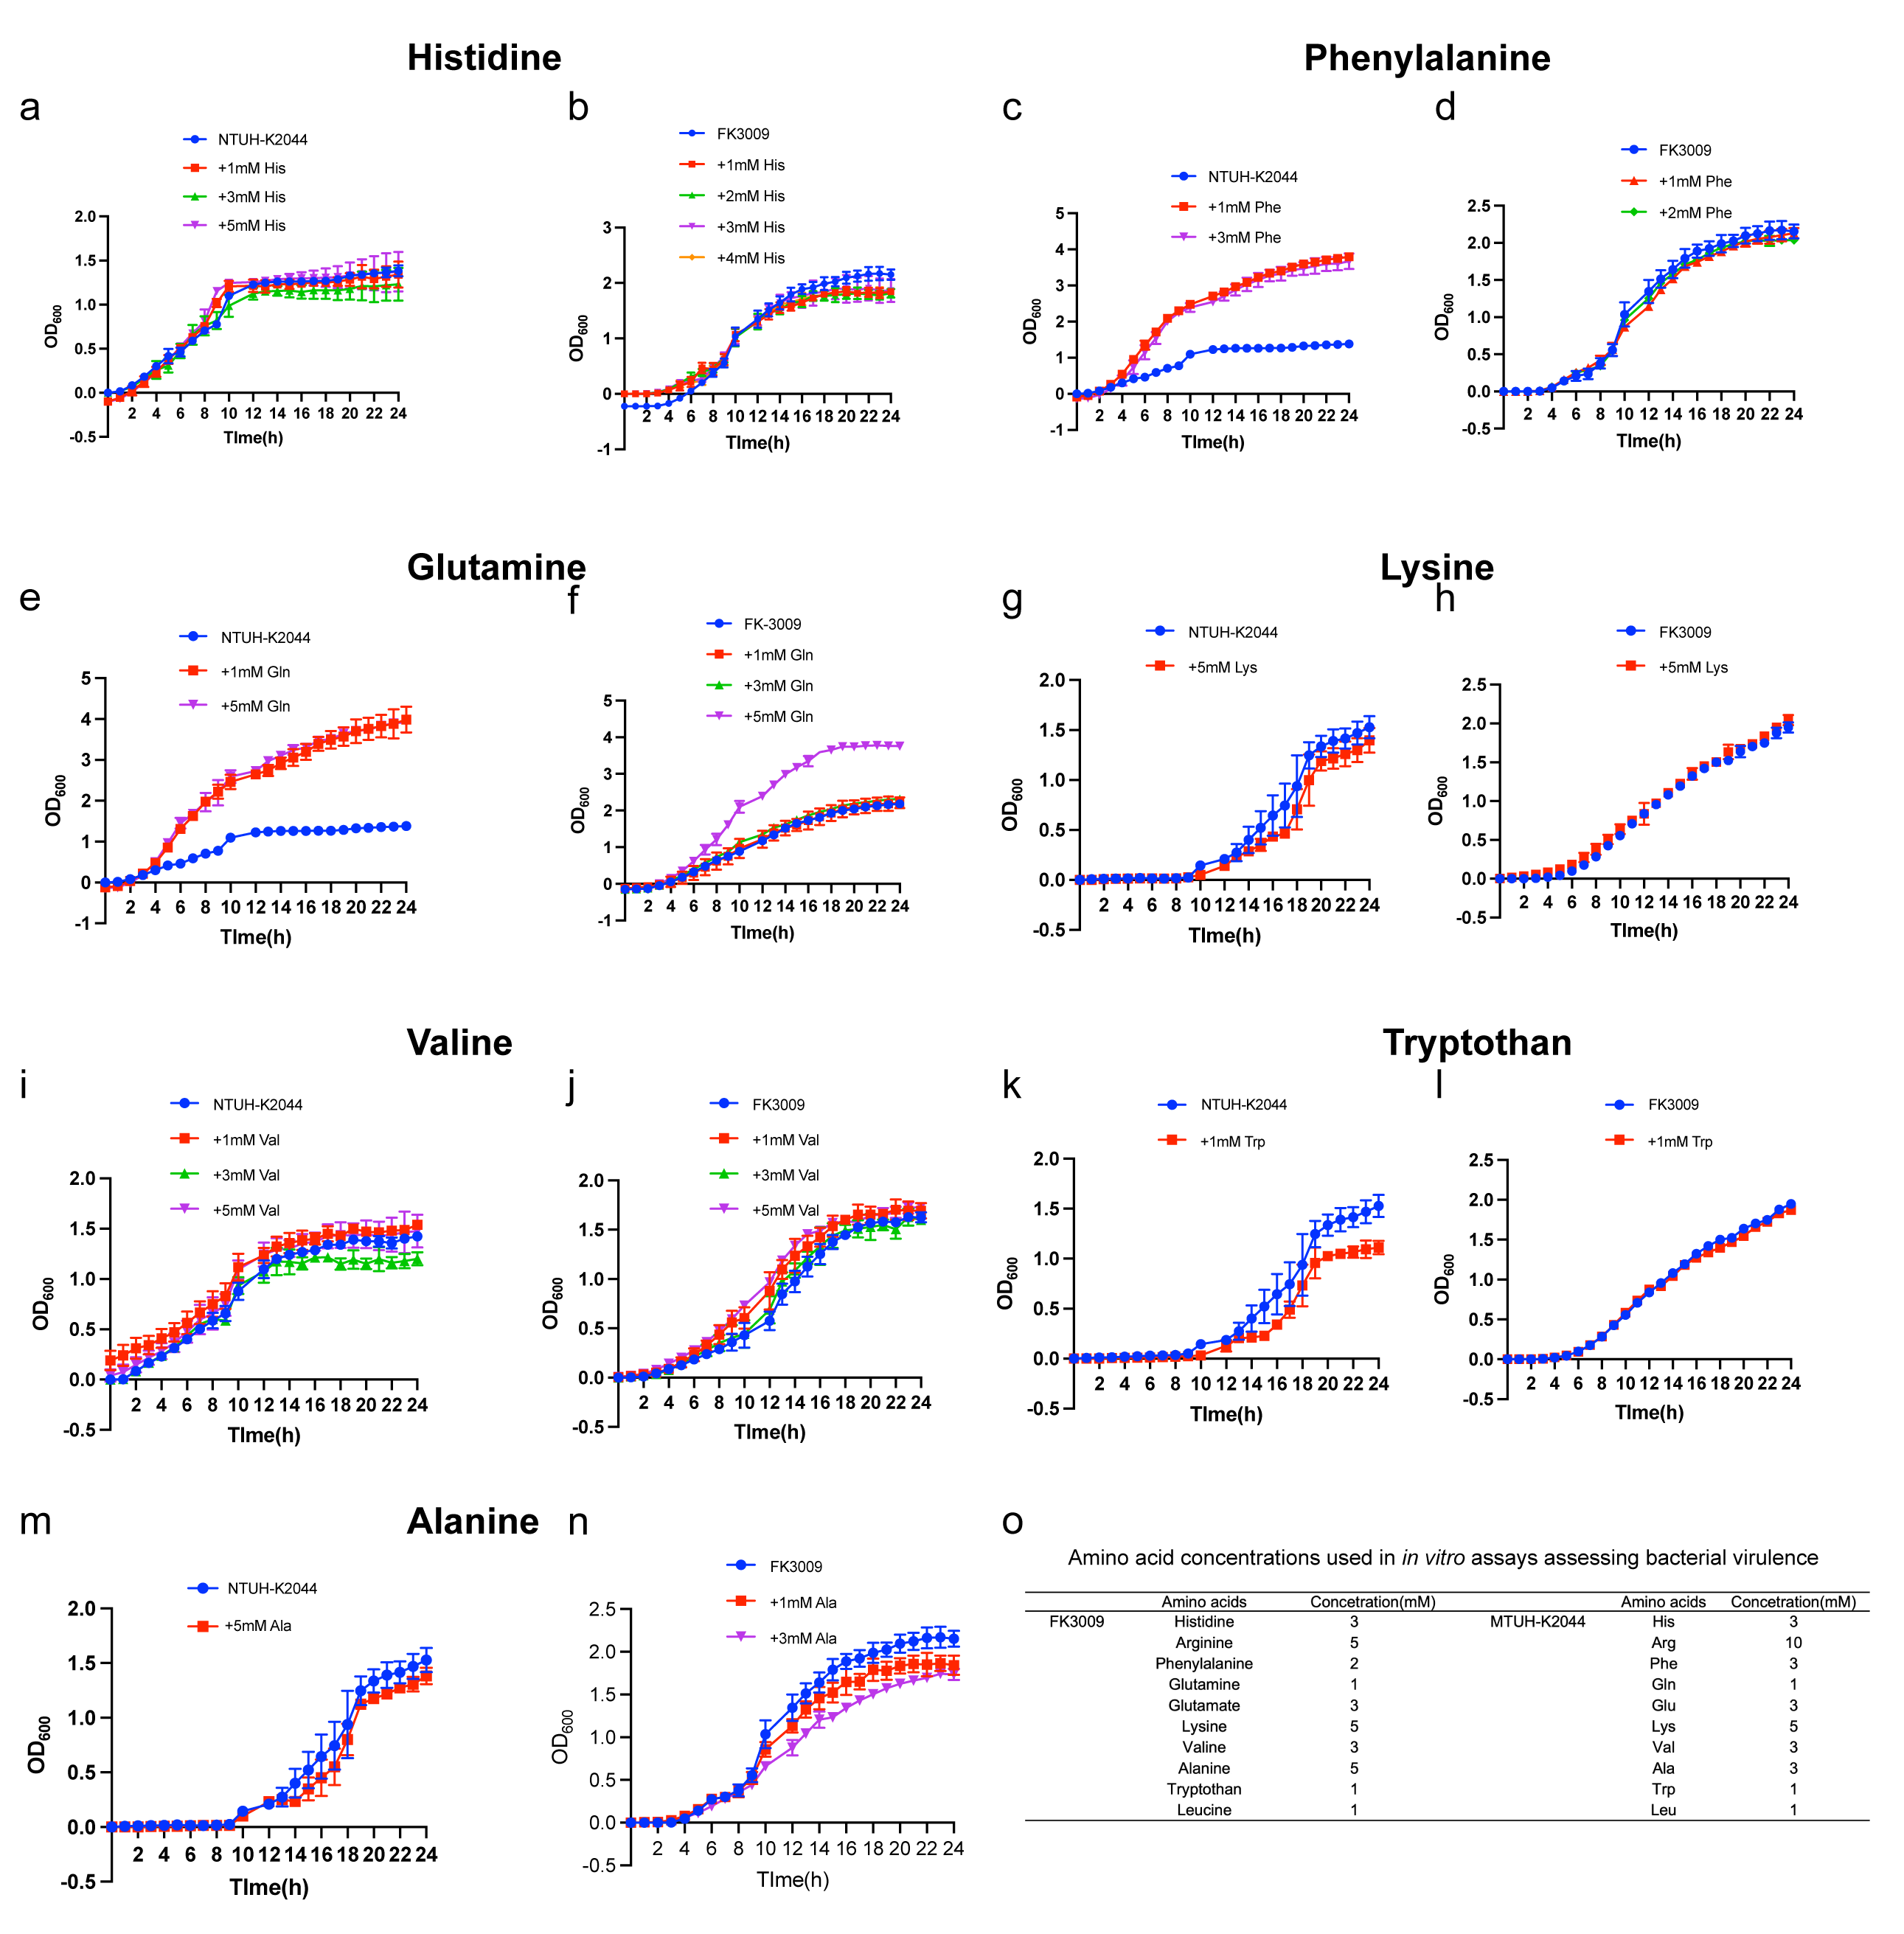
**

**Figure S1. Effects of amino acid supplementation on bacterial growth *in vitro.***Growth curves of *Klebsiella pneumoniae* NTUH-K2044 (panels a, c, e, g, i, k, m) and FK3009 (panels b, d, f, h, j, l, n) in the presence of varying amino acids: histidine (a–b), phenylalanine (c–d), glutamine (e–f), lysine (g–h), valine (i–j), tryptophan (k–l), alanine (m–n). Supplemented concentrations are summarized in panel (o). OD₆₀₀ was recorded over 24 h. Data are shown as mean ± SD of n = 3 biological replicates.


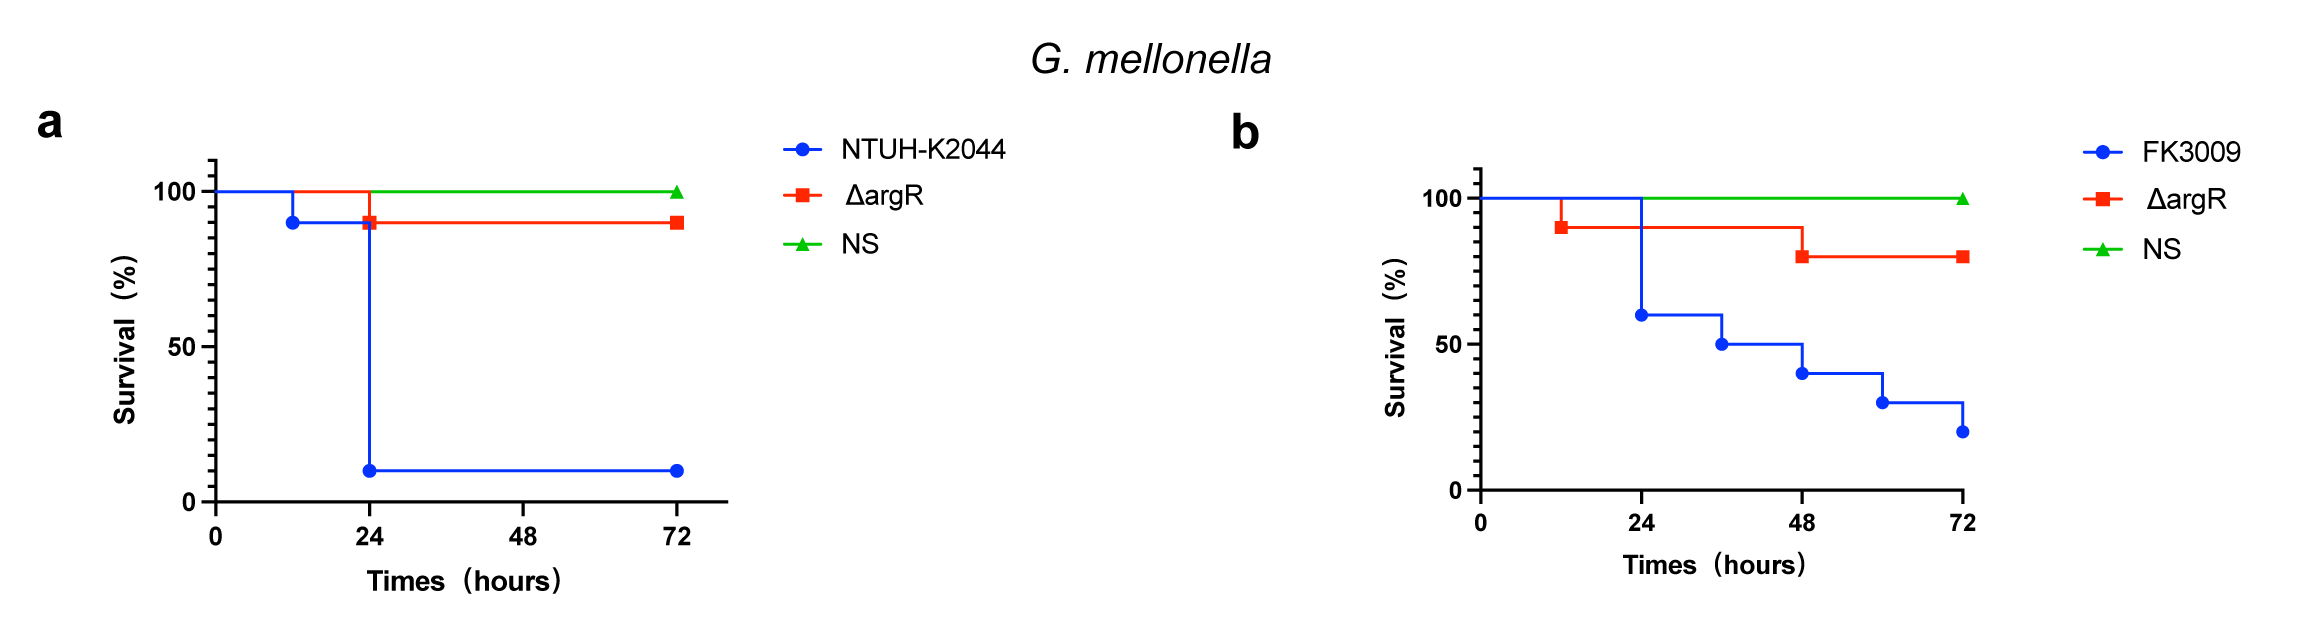


**Figure S2. ArgR is required for full virulence of K. pneumoniae in the Galleria mellonella infection model.** (a) Survival of *G. mellonella* larvae following infection with the hypervirulent NTUH-K2044 wild-type strain, the ΔargR mutant, or PBS (NS) control. Loss of argR markedly attenuated virulence, with ΔargR-infected larvae exhibiting significantly increased survival compared with wild-type.(b) Survival of G. mellonella infected with the carbapenem-resistant FK3009 wild-type strain, its ΔargR derivative, or PBS control. Consistent with results in the hvKp background, argR deletion substantially reduced lethality, indicating that ArgR is essential for virulence across distinct *K. pneumoniae* lineages. Survival was monitored over 72 h. n = 10 larvae per group.


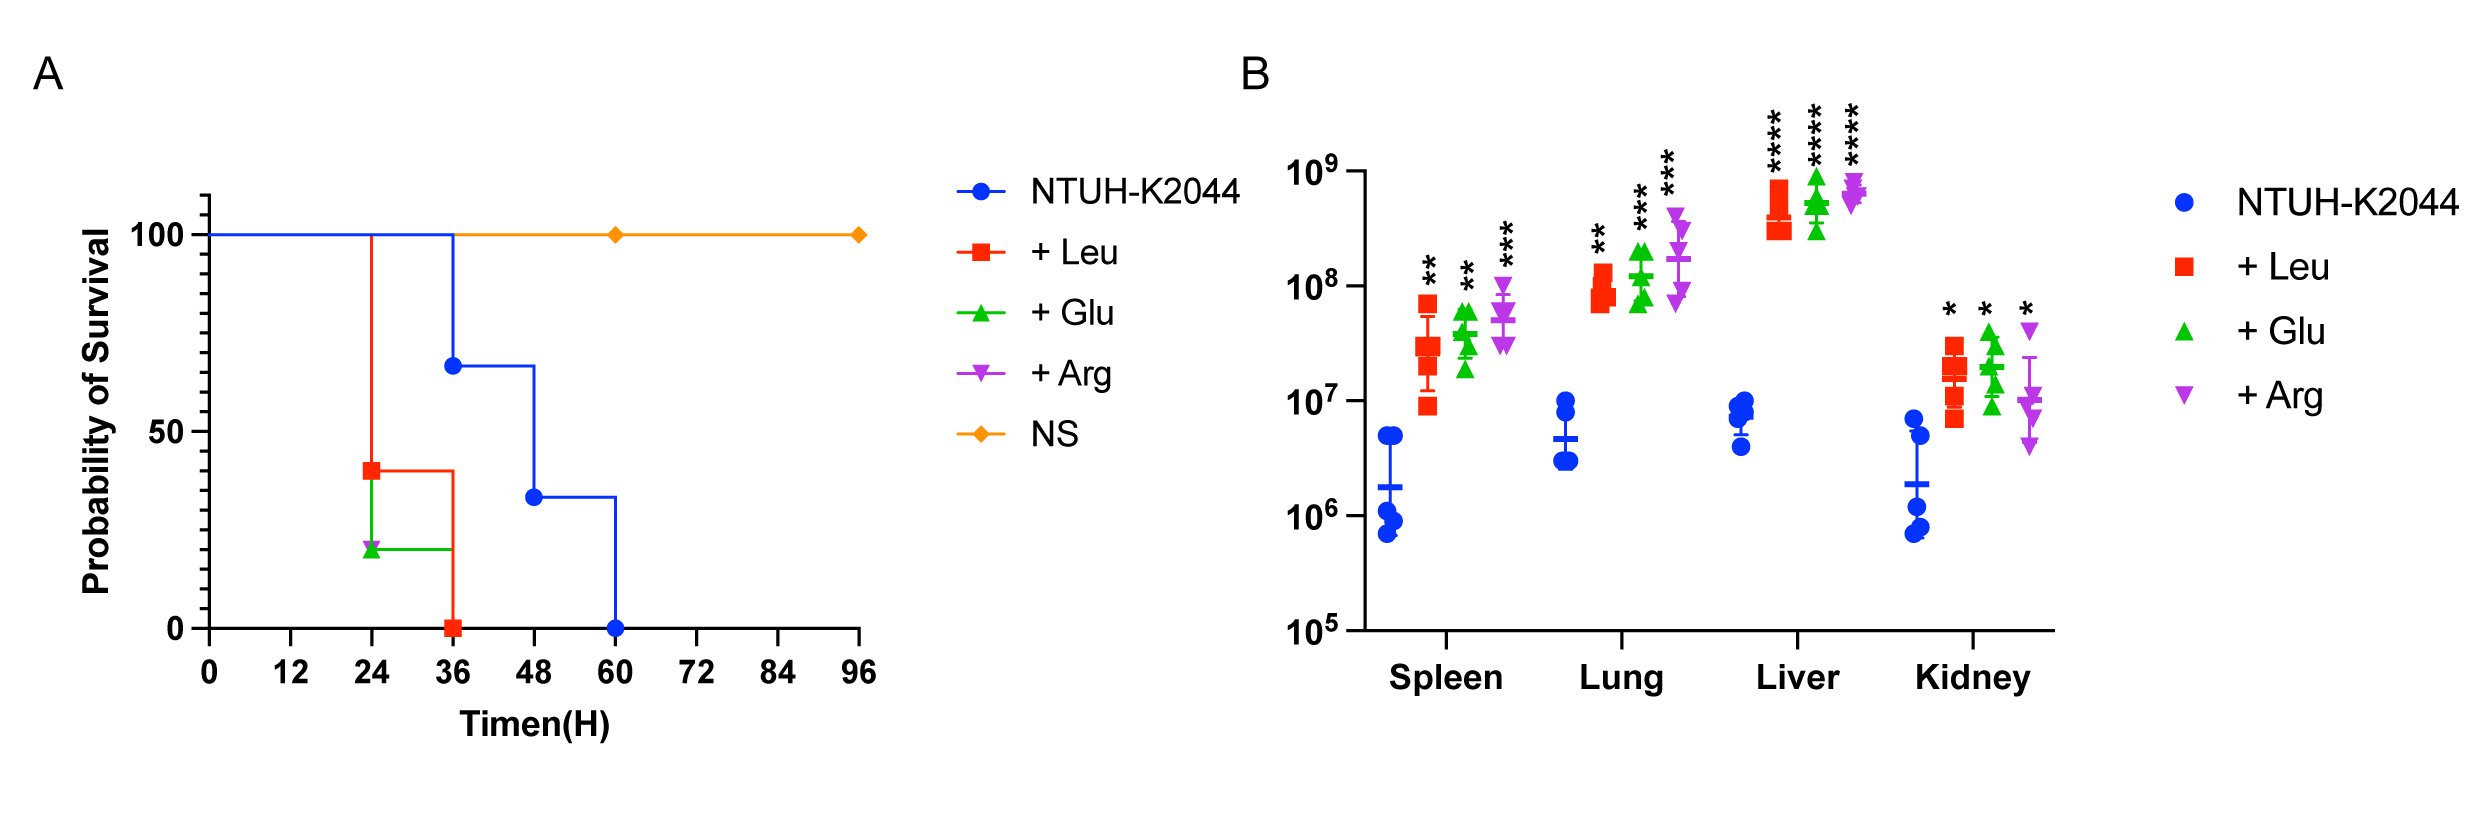


**Figure S3. Effects of amino acid supplementation on the virulence of *Klebsiella pneumoniae* in vivo.**(A) Survival curves of mice infected with *K. pneumoniae* NTUH-K2044 following supplementation with L-leucine, L-glutamine, or L-arginine. Mice receiving no amino acid supplementation (NS) served as controls.(B) Bacterial burdens in the spleen, lung, liver, and kidney at 24 h post-infection. Each symbol represents an individual animal, and bars indicate mean ± SD. Statistical significance was determined using one-way ANOVA with multiple-comparison correction for bacterial counts. *P* < 0.05; ***P*** < 0.01; ***P*** < 0.001; ***P*** < 0.0001.
