# Supplementary material for: Host-derived arginine promotes Klebsiella pneumoniae colonization and dissemination through ArtP–ArgR–capsule signaling
Source: Research Square preprint supplement (doi:10.21203/rs.3.rs-8289577/v1), 2025-12-17
Supplement: Supplementary file 3 [file e74792e8c39c70ea51aa97e1.docx]

Dear Editor,

In accordance with the journal’s guidelines, we would like to recommend a set of potential reviewers who have appropriate expertise to evaluate the scientific content of our study. We believe these individuals possess relevant knowledge in bacterial pathogenesis, host–microbe interactions, and metabolic regulation, and can provide an informed and balanced assessment.

**Suggested Reviewers**

1. **Yao, Yufeng, Professor**

Affiliation: Laboratory of Bacterial Pathogenesis, Shanghai Institute of Immunology, Shanghai Jiao Tong University School of Medicine, Shanghai, China
Email: yfyao@sjtu.edu.cn

1. **Vanessa Sperandio, professor**
   Affiliation: Department of Microbiology, University of Texas (UT) Southwestern Medical Center, Dallas, TX 75390

Email: [vanessa.sperandio@utsouthwestern.edu](mailto:vanessa.sperandio@utsouthwestern.edu)

1. **Francesca L. Short, professor**
   Affiliation: Wellcome Sanger Institute, Hinxton, Cambridgeshire, United Kingdom
   Email: fs13@sanger.ac.uk

We believe these reviewers would provide constructive and unbiased evaluations.

**Reviewers to Exclude**

We respectfully request that the following individuals not be considered as reviewers due to **[choose: potential conflicts of interest, prior collaborations, direct competition, or** **overlapping research programs]**:

1. **Laura A Mike, professor**
   Affiliation: Department of Medicine, Division of Infectious Diseases, University of Pittsburgh, Pittsburgh, PA, USA

Email: laura.mike@pitt.edu

Reason for exclusion: **overlapping research programs**

We provide this list solely to ensure a fair and impartial review process.

Sincerely,

Fangyou Yu, PhD, Professor

Department of Clinical Laboratory Medicine, Shanghai Pulmonary Hospital, Tongji University School of Medicine,

Shanghai 200082, People’s Republic of China

wzjxyfy@163.com
